# Supplementary material
Source: PubMed Central journal article supplement (PMC4832927)
Supplement: NIHMS776226-supplement-3.pdf [file NIHMS776226-supplement-3.pdf]

| Category      | Annotation Cluster 1 Category | Enrichment Score: 7.984500598278341 Term                                        | Count | %     | PValue      | Proteins                                                                                                                                                                                                                                                                                                                                                                                                                       |
|---------------|-------------------------------|---------------------------------------------------------------------------------|-------|-------|-------------|--------------------------------------------------------------------------------------------------------------------------------------------------------------------------------------------------------------------------------------------------------------------------------------------------------------------------------------------------------------------------------------------------------------------------------|
| mitochondria  | GOTERM_CC_FAT                 | GO:0005739-mitochondrion                                                        | 52    | 21.31 | 7.00236E-12 | P54071, Q60597, Q9DB10, Q9R127, Q9CQV7, Q99L43, Q8BH59, Q9DCW4, Q8BWF0, P97450, Q9CPW2, P84091, Q9CQ85, Q66GT5, P56382, Q8CC88, Q05920, Q9ERS2, P47802, P56375, Q35683, P52196, Q9ESW4, Q4KMM3, P19096, Q80Y14, Q9CZU6, Q9QUHO, Q791T5, Q9CPP6, Q924L1, P28271, P97493, Q9CQX8, Q8BIJ6, Q91V92, Q9D051, Q9D8S9, Q9D8T7, P19246, Q9D1L0, Q9JKL4, P58059, Q9D0L7, Q9WVLO, P26638, Q9CQ69, Q9EQ80, P05063, P58281, Q9CZD3, P03893 |
| mitochondria  | GOTERM_CC_FAT                 | GO:0044429-mitochondrial part                                                   | 28    | 11.48 | 4.0111E-09  | Q791T5, Q9CPP6, P54071, Q60597, Q9CQX8, Q8BIJ6, Q9D051, Q9CQV7, Q8BH59, Q99L43, Q9DCW4, Q9JKL4, P58059, P97450, Q9CPW2, Q9CQ85, Q66GT5, Q9CQ69, P56382, Q05920, P58281, Q9ERS2, P47802, Q35683, P52196, Q9ESW4, Q9CZU6, P03893                                                                                                                                                                                                 |
| mitochondria  | GOTERM_CC_FAT                 | GO:0031967-organelle envelope                                                   | 28    | 11.48 | 7.62946E-09 | Q791T5, Q9CPP6, P54071, P21619, Q60597, Q8BKC5, Q9CQV7, Q8BH59, Q99L43, Q9JKL4, P58059, P97450, Q07076, Q9CQ85, Q66GT5, Q9CQ69, P56382, Q91YE6, Q05920, P58281, Q9ERS2, P47802, Q35683, P52196, Q9ESW4, Q9ERU9, Q9CXW3, P03893                                                                                                                                                                                                 |
| mitochondria  | SP_PIR_KEYWORDS               | mitochondrion                                                                   | 34    | 13.93 | 7.87809E-09 | Q791T5, Q9CPP6, P54071, P97493, Q60597, Q9DB10, Q9CQX8, Q8BIJ6, Q9D051, Q9CQV7, Q8BH59, Q99L43, Q9D8T7, Q9DCW4, Q9D1L0, Q8BWF0, Q9JKL4, P58059, P97450, Q9CPW2, Q9CQ85, Q66GT5, P56382, Q9CQ69, Q05920, P58281, Q9ERS2, P47802, Q35683, P52196, Q9ESW4, Q4KMM3, Q9CZU6, P03893                                                                                                                                                 |
| mitochondria  | GOTERM_CC_FAT                 | GO:0031975-envelope                                                             | 28    | 11.48 | 8.25312E-09 | Q791T5, Q9CPP6, P54071, P21619, Q60597, Q8BKC5, Q9CQV7, Q8BH59, Q99L43, Q9JKL4, P58059, P97450, Q07076, Q9CQ85, Q66GT5, Q9CQ69, P56382, Q91YE6, Q05920, P58281, Q9ERS2, P47802, Q35683, P52196, Q9ESW4, Q9ERU9, Q9CXW3, P03893                                                                                                                                                                                                 |
| mitochondria  | GOTERM_CC_FAT                 | GO:0019866-organelle inner membrane                                             | 21    | 8.61  | 1.39463E-08 | Q791T5, Q9CPP6, P97450, P54071, P21619, Q9CQ85, Q66GT5, P56382, Q9CQ69, Q05920, Q9CQV7, Q8BH59, Q99L43, P58281, Q9ERS2, P47802, Q35683, P52196, Q9JKL4, P03893, P58059                                                                                                                                                                                                                                                         |
| mitochondria  | GOTERM_CC_FAT                 | GO:0031090-organelle membrane                                                   | 34    | 13.93 | 2.12705E-08 | Q791T5, Q9CPP6, P54071, P21619, Q60597, Q9CQ95, Q9CQV7, Q99L43, Q8BH59, P17047, Q8K3H0, Q9JKL4, P58059, Q810B6, Q811D0, P97450, Q9Z12, Q08585, Q9CQ85, Q35609, Q66GT5, P56382, Q9CQ69, Q9JKD3, Q05920, P58281, Q62277, Q9ERS2, P47802, Q35683, Q6NVE8, P52196, Q9ESW4, P03893                                                                                                                                                  |
| mitochondria  | GOTERM_CC_FAT                 | GO:0005743-mitochondrial inner membrane                                         | 20    | 8.20  | 3.21884E-08 | Q791T5, Q9CPP6, P97450, P54071, Q9CQ85, Q66GT5, P56382, Q9CQ69, Q05920, Q9CQV7, Q8BH59, Q99L43, P58281, Q9ERS2, P47802, Q35683, P52196, Q9JKL4, P03893, P58059                                                                                                                                                                                                                                                                 |
| mitochondria  | GOTERM_CC_FAT                 | GO:0031966-mitochondrial membrane                                               | 22    | 9.02  | 4.48598E-08 | Q791T5, Q9CPP6, P97450, P54071, Q9CQ85, Q66GT5, Q60597, P56382, Q9CQ69, Q05920, Q9CQV7, Q8BH59, Q99L43, P58281, Q9ERS2, P47802, Q35683, P52196, Q9ESW4, Q9JKL4, P03893, P58059                                                                                                                                                                                                                                                 |
| mitochondria  | GOTERM_CC_FAT                 | GO:0005740-mitochondrial envelope                                               | 22    | 9.02  | 1.25771E-07 | Q791T5, Q9CPP6, P97450, P54071, Q9CQ85, Q66GT5, Q60597, P56382, Q9CQ69, Q05920, Q9CQV7, Q8BH59, Q99L43, P58281, Q9ERS2, P47802, Q35683, P52196, Q9ESW4, Q9JKL4, P03893, P58059                                                                                                                                                                                                                                                 |
| mitochondria  | SP_PIR_KEYWORDS               | mitochondrion inner membrane                                                    | 15    | 6.15  | 1.97278E-07 | Q791T5, Q9CPP6, P97450, Q9CQ85, Q66GT5, Q9CQ69, P56382, Q9CQV7, Q8BH59, Q99L43, P58281, Q9ERS2, Q35683, Q9JKL4, P03893                                                                                                                                                                                                                                                                                                         |
|               | Annotation Cluster 2 Category | Enrichment Score: 5.76289866237697 Term                                         | Count | %     | PValue      | Genes                                                                                                                                                                                                                                                                                                                                                                                                                          |
| Transcription | GOTERM_BP_FAT                 | GO:0006418-tRNA aminoacylation for protein translation                          | 10    | 4.10  | 8.58779E-09 | Q9CZD3, P32921, Q61035, Q8BLY2, Q3U0V1, P26638, Q8BIJ6, Q8BGQ7, Q8BU30, Q9D0R2                                                                                                                                                                                                                                                                                                                                                 |
| Transcription | GOTERM_BP_FAT                 | GO:0043039-tRNA aminoacylation                                                  | 10    | 4.10  | 8.58779E-09 | Q9CZD3, P32921, Q61035, Q8BLY2, Q3U0V1, P26638, Q8BIJ6, Q8BGQ7, Q8BU30, Q9D0R2                                                                                                                                                                                                                                                                                                                                                 |
| Transcription | GOTERM_BP_FAT                 | GO:0043038-amino acid activation                                                | 10    | 4.10  | 8.58779E-09 | Q9CZD3, P32921, Q61035, Q8BLY2, Q3U0V1, P26638, Q8BIJ6, Q8BGQ7, Q8BU30, Q9D0R2                                                                                                                                                                                                                                                                                                                                                 |
| Transcription | GOTERM_MF_FAT                 | GO:0004812-aminoacyl-tRNA ligase activity                                       | 10    | 4.10  | 1.04631E-08 | Q9CZD3, P32921, Q61035, Q8BLY2, Q3U0V1, P26638, Q8BIJ6, Q8BGQ7, Q8BU30, Q9D0R2                                                                                                                                                                                                                                                                                                                                                 |
| Transcription | GOTERM_MF_FAT                 | GO:0016875-ligase activity, forming carbon-oxygen bonds                         | 10    | 4.10  | 1.04631E-08 | Q9CZD3, P32921, Q61035, Q8BLY2, Q3U0V1, P26638, Q8BIJ6, Q8BGQ7, Q8BU30, Q9D0R2                                                                                                                                                                                                                                                                                                                                                 |
| Transcription | GOTERM_MF_FAT                 | GO:0016876-ligase activity, forming aminoacyl-tRNA and related compounds        | 10    | 4.10  | 1.04631E-08 | Q9CZD3, P32921, Q61035, Q8BLY2, Q3U0V1, P26638, Q8BIJ6, Q8BGQ7, Q8BU30, Q9D0R2                                                                                                                                                                                                                                                                                                                                                 |
| Transcription | SP_PIR_KEYWORDS               | Aminoacyl-tRNA synthetase                                                       | 9     | 3.69  | 4.20788E-08 | Q9CZD3, P32921, Q61035, Q8BLY2, P26638, Q8BIJ6, Q8BGQ7, Q8BU30, Q9D0R2                                                                                                                                                                                                                                                                                                                                                         |
| Transcription | KEGG_PATHWAY                  | mmu00970:Aminoacyl-tRNA biosynthesis                                            | 9     | 3.69  | 4.29753E-07 | Q9CZD3, P32921, Q61035, Q8BLY2, P26638, Q8BIJ6, Q8BGQ7, Q8BU30, Q9D0R2                                                                                                                                                                                                                                                                                                                                                         |
| Transcription | INTERPRO                      | IPR002314:Aminoacyl-tRNA synthetase, class II (G, H, P and S), conserved region | 5     | 2.05  | 8.70783E-06 | Q9CZD3, Q61035, Q8BLY2, P26638, Q9D0R2                                                                                                                                                                                                                                                                                                                                                                                         |
| Transcription | SP_PIR_KEYWORDS               | protein biosynthesis                                                            | 11    | 4.51  | 1.93808E-05 | Q9CZD3, P32921, Q61035, Q8BLY2, P26638, Q8BIJ6, P14115, P23116, Q8BGQ7, Q8BU30, Q9D0R2                                                                                                                                                                                                                                                                                                                                         |
| Transcription | GOTERM_BP_FAT                 | GO:0006399-tRNA metabolic process                                               | 10    | 4.10  | 2.14637E-05 | Q9CZD3, P32921, Q61035, Q8BLY2, Q3U0V1, P26638, Q8BIJ6, Q8BGQ7, Q8BU30, Q9D0R2                                                                                                                                                                                                                                                                                                                                                 |
| Transcription | GOTERM_BP_FAT                 | GO:0006412-translation                                                          | 16    | 6.56  | 2.73732E-05 | P32921, Q61035, Q9CPR4, P26638, Q8BIJ6, Q8BGQ7, P23116, P14115, P14206, Q9CZD3, Q8BLY2, Q3U0V1, Q8BU30, Q9D8E6, Q9D0R2, P58059                                                                                                                                                                                                                                                                                                 |
| Transcription | INTERPRO                      | IPR006195:Aminoacyl-tRNA synthetase, class II, conserved region                 | 5     | 2.05  | 5.90434E-05 | Q9CZD3, Q61035, Q8BLY2, P26638, Q9D0R2                                                                                                                                                                                                                                                                                                                                                                                         |
| Transcription | INTERPRO                      | IPR004154:Anticodon-binding                                                     | 4     | 1.64  | 0.00017432  | Q9CZD3, Q61035, Q8BLY2, Q9D0R2                                                                                                                                                                                                                                                                                                                                                                                                 |
| Transcription | GOTERM_BP_FAT                 | GO:0034660-ncRNA metabolic process                                              | 11    | 4.51  | 0.000410825 | Q9CZD3, P32921, Q61035, Q8BLY2, Q3U0V1, P26638, Q8BIJ6, Q8BGQ7, Q8BU30, Q9D0R2, Q923D5                                                                                                                                                                                                                                                                                                                                         |
| Transcription | INTERPRO                      | IPR001412:Aminoacyl-tRNA synthetase, class I, conserved site                    | 5     | 2.05  | 0.000966728 | P32921, P17047, Q3U0V1, Q8BIJ6, Q8BU30                                                                                                                                                                                                                                                                                                                                                                                         |
| Transcription | SP_PIR_KEYWORDS               | ligase                                                                          | 12    | 4.92  | 0.002018475 | Q9CZD3, P32921, Q61035, Q8BLY2, P26638, Q8BIJ6, Q8BGQ7, Q8BU30, Q05920, Q64737, Q3U487, Q9D0R2                                                                                                                                                                                                                                                                                                                                 |
|               | Annotation Cluster 3 Category | Enrichment Score: 4.4598344410174295 Term                                       | Count | %     | PValue      | Genes                                                                                                                                                                                                                                                                                                                                                                                                                          |
| mitochondria  | SP_PIR_KEYWORDS               | mitochondrion                                                                   | 34    | 13.93 | 7.87809E-09 | Q791T5, Q9CPP6, P54071, P97493, Q60597, Q9DB10, Q9CQX8, Q8BIJ6, Q9D051, Q9CQV7, Q8BH59, Q99L43, Q9D8T7, Q9DCW4, Q9D1L0, Q8BWF0, Q9JKL4, P58059, P97450, Q9CPW2, Q9CQ85, Q66GT5, P56382, Q9CQ69, Q05920, P58281, Q9ERS2, P47802, Q35683, P52196, Q9ESW4, Q4KMM3, Q9CZU6, P03893                                                                                                                                                 |

|              |                               |                                                             |       |       |             |                                                                                                                                                                                                                                                                                                                                                        |
|--------------|-------------------------------|-------------------------------------------------------------|-------|-------|-------------|--------------------------------------------------------------------------------------------------------------------------------------------------------------------------------------------------------------------------------------------------------------------------------------------------------------------------------------------------------|
| mitochondria | SP_PIR_KEYWORDS               | transit peptide                                             | 16    | 6.56  | 0.001442618 | P54071, P97450, Q9CPW2, P97493, Q9DB10, Q60597, Q66GT5, Q8BIJ6, Q05920, Q9D051, P58281, Q9D8T7, Q9D1L0, Q9ESW4, Q8BWF0, Q9CZU6                                                                                                                                                                                                                         |
| mitochondria | UP_SEQ_FEATURE                | transit peptide:Mitochondrion                               | 16    | 6.56  | 0.003672184 | P54071, P97450, Q9CPW2, P97493, Q9DB10, Q60597, Q66GT5, Q8BIJ6, Q05920, Q9D051, P58281, Q9D8T7, Q9D1L0, Q9ESW4, Q8BWF0, Q9CZU6                                                                                                                                                                                                                         |
| mitochondria | Annotation Cluster 4 Category | Enrichment Score: 4.143337264351797<br>Term                 | Count | %     | PValue      | Genes                                                                                                                                                                                                                                                                                                                                                  |
| mitochondria | GOTERM_BP_FAT                 | GO:006091-generation of precursor metabolites and energy    | 22    | 9.02  | 4.83949E-11 | Q9CPP6, P97450, P54071, P05201, Q9CPW2, P28271, P97493, Q60597, P56382, Q9CQ69, P06745, Q9D051, Q8BH59, P05063, Q9ERS2, Q9DCW4, Q8C0L0, O35683, Q8BWF0, Q9CZU6, Q9QUH0, P03893                                                                                                                                                                         |
| mitochondria | GOTERM_BP_FAT                 | GO:0022900-electron transport chain                         | 12    | 4.92  | 3.15522E-07 | Q9CPP6, Q9ERS2, Q9DCW4, Q8C0L0, Q9CPW2, O35683, P97493, Q9CQ69, Q8BWF0, Q8BH59, P03893, Q9QUH0                                                                                                                                                                                                                                                         |
| mitochondria | SP_PIR_KEYWORDS               | electron transport                                          | 10    | 4.10  | 8.38447E-06 | Q9CPP6, Q9ERS2, Q9DCW4, Q8C0L0, Q9CPW2, O35683, P97493, Q9CQ69, P03893, Q9QUH0                                                                                                                                                                                                                                                                         |
| mitochondria | GOTERM_BP_FAT                 | GO:0055114-oxidation reduction                              | 19    | 7.79  | 0.004214331 | Q9CPP6, P54071, Q9CPW2, P97493, Q60597, Q9CQ69, Q9D051, O88712, Q8BH59, Q9CY27, Q9ERS2, Q9DCW4, Q8C0L0, O35683, Q00612, Q8BWF0, P19096, Q9QUH0, P03893                                                                                                                                                                                                 |
| mitochondria | SP_PIR_KEYWORDS               | respiratory chain                                           | 5     | 2.05  | 0.009799168 | Q9CPP6, Q9ERS2, O35683, Q9CQ69, P03893                                                                                                                                                                                                                                                                                                                 |
| mitochondria | GOTERM_CC_FAT                 | GO:0070469-respiratory chain                                | 5     | 2.05  | 0.012940514 | Q9CPP6, Q9ERS2, O35683, Q9CQ69, P03893                                                                                                                                                                                                                                                                                                                 |
| mitochondria | GOTERM_MF_FAT                 | GO:0016651-oxidoreductase activity, acting on NADH or NADPH | 3     | 1.23  | 0.145032146 | Q9CPP6, Q9ERS2, P03893                                                                                                                                                                                                                                                                                                                                 |
| cytoskeleton | Annotation Cluster 5 Category | Enrichment Score: 3.529247705841288<br>Term                 | Count | %     | PValue      | Genes                                                                                                                                                                                                                                                                                                                                                  |
| cytoskeleton | GOTERM_BP_FAT                 | GO:0030036-actin cytoskeleton organization                  | 11    | 4.51  | 7.89061E-05 | Q811D0, P70336, Q3UHD9, Q9Z2H5, P08556, Q0GNC1, Q9JL26, Q3UH68, P63001, Q8BPM0, Q03173                                                                                                                                                                                                                                                                 |
| cytoskeleton | GOTERM_BP_FAT                 | GO:0030029-actin filament-based process                     | 11    | 4.51  | 0.000135133 | Q811D0, P70336, Q3UHD9, Q9Z2H5, P08556, Q0GNC1, Q9JL26, Q3UH68, P63001, Q8BPM0, Q03173                                                                                                                                                                                                                                                                 |
| cytoskeleton | GOTERM_BP_FAT                 | GO:0007010-cytoskeleton organization                        | 14    | 5.74  | 0.000472138 | P70336, Q811D0, Q9Z2H5, P08556, Q3U0U96, Q3UH68, P63001, Q03173, P54227, Q3UHD9, Q0GNC1, P19246, Q9JL26, Q8BPM0                                                                                                                                                                                                                                        |
| cytoskeleton | GOTERM_MF_FAT                 | GO:0003779-actin binding                                    | 12    | 4.92  | 0.001517286 | Q9CQI3, Q7TMB8, Q9QYB5, Q9Z2H5, Q3V0K9, Q0GNC1, Q9JL26, Q9CPW4, Q3UH68, Q8BPM0, Q9JKK7, Q03173                                                                                                                                                                                                                                                         |
| cytoskeleton | Annotation Cluster 6 Category | Enrichment Score: 3.174013563079447<br>Term                 | Count | %     | PValue      | Genes                                                                                                                                                                                                                                                                                                                                                  |
|              | INTERPRO                      | IPR001023:Heat shock protein Hsp70                          | 4     | 1.64  | 0.00033585  | P48722, Q9JKR6, Q61699, Q61316                                                                                                                                                                                                                                                                                                                         |
|              | INTERPRO                      | IPR013126:Heat shock protein 70                             | 4     | 1.64  | 0.00033585  | P48722, Q9JKR6, Q61699, Q61316                                                                                                                                                                                                                                                                                                                         |
|              | INTERPRO                      | IPR018181:Heat shock protein 70, conserved site             | 4     | 1.64  | 0.000570994 | P48722, Q9JKR6, Q61699, Q61316                                                                                                                                                                                                                                                                                                                         |
|              | SP_PIR_KEYWORDS               | stress response                                             | 5     | 2.05  | 0.003126243 | P54071, P48722, Q9JKR6, Q61699, Q61316                                                                                                                                                                                                                                                                                                                 |
| cytoskeleton | Annotation Cluster 7 Category | Enrichment Score: 3.12038267063547<br>Term                  | Count | %     | PValue      | Genes                                                                                                                                                                                                                                                                                                                                                  |
| cytoskeleton | SP_PIR_KEYWORDS               | microtubule                                                 | 12    | 4.92  | 0.000214824 | P54227, P28740, Q9ERD7, Q9QXL2, Q6A065, P39054, P27546, Q8BRT1, O08788, Q80U49, P62627, Q8C1B1                                                                                                                                                                                                                                                         |
| cytoskeleton | SP_PIR_KEYWORDS               | cytoskeleton                                                | 20    | 8.20  | 0.00037062  | P28740, Q9Z2H5, Q9QWI6, Q6A065, Q9CPW4, Q8R5J9, P39054, Q80U49, P23116, O08788, Q03173, Q6PDI5, Q61301, Q91VR8, Q9QYB5, P19246, Q8CHH9, Q8BRT1, Q9JKK7, Q9JMH9                                                                                                                                                                                         |
| cytoskeleton | GOTERM_CC_FAT                 | GO:0005856-cytoskeleton                                     | 31    | 12.70 | 0.000401775 | Q9Z2H5, P21619, P23116, O08788, Q03173, Q6PDI5, Q9QXL2, P19246, Q8CHH9, Q9JMH9, Q811D0, P70336, P28740, Q9QWI6, Q6A065, Q9CPW4, Q8R5J9, P39054, Q6PFD5, Q80U49, P62627, Q4ACU6, Q61301, P54227, Q91VR8, Q9QYB5, Q9ERD7, P27546, Q8BRT1, Q9JKK7, Q8C1B1                                                                                                 |
| cytoskeleton | GOTERM_CC_FAT                 | GO:0044430-cytoskeletal part                                | 24    | 9.84  | 0.000493992 | Q811D0, P70336, P28740, P21619, Q6A065, Q9CPW4, P39054, Q6PFD5, Q80U49, P62627, P23116, O08788, Q03173, Q4ACU6, Q6PDI5, P54227, Q9ERD7, Q9QXL2, P19246, Q8CHH9, Q8BRT1, P27546, Q9JMH9, Q8C1B1                                                                                                                                                         |
| cytoskeleton | GOTERM_CC_FAT                 | GO:0005874-microtubule                                      | 12    | 4.92  | 0.00055506  | P54227, P28740, Q9ERD7, Q9QXL2, Q6A065, P39054, P27546, Q8BRT1, O08788, Q80U49, P62627, Q8C1B1                                                                                                                                                                                                                                                         |
| cytoskeleton | GOTERM_CC_FAT                 | GO:0043228-non-membrane-bounded organelle                   | 43    | 17.62 | 0.001692811 | Q9Z2H5, P21619, Q9CPR4, O54962, Q9CQX8, O08788, P23116, Q03173, Q6PDI5, Q9Z3D5, P14206, Q60668, Q9QXL2, P19246, Q8CHH9, Q9D8E6, Q9JMH9, P58059, Q811D0, P70336, P28740, P10922, Q9QWI6, Q6A065, Q9CPW4, P39054, Q8R5J9, Q6PFD5, Q8BTY2, Q80U49, P62627, P14115, Q4ACU6, Q61301, P54227, Q91VR8, Q9QYB5, Q9ERD7, Q8BRT1, P27546, Q4KMM3, Q9JKK7, Q8C1B1 |
| cytoskeleton | GOTERM_CC_FAT                 | GO:0043232-intracellular non-membrane-bounded organelle     | 43    | 17.62 | 0.001692811 | Q9Z2H5, P21619, Q9CPR4, O54962, Q9CQX8, O08788, P23116, Q03173, Q6PDI5, Q9Z3D5, P14206, Q60668, Q9QXL2, P19246, Q8CHH9, Q9D8E6, Q9JMH9, P58059, Q811D0, P70336, P28740, P10922, Q9QWI6, Q6A065, Q9CPW4, P39054, Q8R5J9, Q6PFD5, Q8BTY2, Q80U49, P62627, P14115, Q4ACU6, Q61301, P54227, Q91VR8, Q9QYB5, Q9ERD7, Q8BRT1, P27546, Q4KMM3, Q9JKK7, Q8C1B1 |
| cytoskeleton | GOTERM_CC_FAT                 | GO:0015630-microtubule cytoskeleton                         | 15    | 6.15  | 0.004331794 | P70336, P28740, Q6A065, P39054, Q80U49, P23116, O08788, P62627, Q6PDI5, P54227, Q9ERD7, Q9QXL2, P27546, Q8BRT1, Q8C1B1                                                                                                                                                                                                                                 |
| cytoskeleton | Annotation Cluster 8 Category | Enrichment Score: 2.559623030917132<br>Term                 | Count | %     | PValue      | Genes                                                                                                                                                                                                                                                                                                                                                  |
| cytoskeleton | GOTERM_MF_FAT                 | GO:0008092-cytoskeletal protein binding                     | 15    | 6.15  | 0.0011633   | Q9CQI3, Q9Z2H5, Q3V0K9, Q9CPW4, Q3UH68, Q03173, P54227, Q9QYB5, Q7TMB8, Q58A65, Q0GNC1, Q9JL26, Q8BRT1, Q8BPM0, Q9JKK7                                                                                                                                                                                                                                 |
| cytoskeleton | GOTERM_MF_FAT                 | GO:0003779-actin binding                                    | 12    | 4.92  | 0.001517286 | Q9CQI3, Q7TMB8, Q9QYB5, Q9Z2H5, Q3V0K9, Q0GNC1, Q9JL26, Q9CPW4, Q3UH68, Q8BPM0, Q9JKK7, Q03173                                                                                                                                                                                                                                                         |
| cytoskeleton | SP_PIR_KEYWORDS               | actin-binding                                               | 9     | 3.69  | 0.011867841 | Q7TMB8, Q9QYB5, Q9Z2H5, Q3V0K9, Q0GNC1, Q9CPW4, Q8BPM0, Q9JKK7, Q03173                                                                                                                                                                                                                                                                                 |

| Annotation Cluster 9  |                 | Enrichment Score: 2.361678413877474                |    |        |             |                                                                                                                                                                                                                                                                                                                                        |  |
|-----------------------|-----------------|----------------------------------------------------|----|--------|-------------|----------------------------------------------------------------------------------------------------------------------------------------------------------------------------------------------------------------------------------------------------------------------------------------------------------------------------------------|--|
| Category              | Term            | Count                                              | %  | PValue | Genes       |                                                                                                                                                                                                                                                                                                                                        |  |
| nucleus               | GOTERM_MF_FAT   | GO:000166-nucleotide binding                       | 49 | 20.08  | 0.000151795 | P54071, P32921, Q64737, Q60668, P59708, Q80Z11, Q9JKR6, Q8CHH9, Q9Z130, Q8BU30, Q9JMH9, P70336, Q99020, P63001, Q35609, Q8CC88, Q05920, Q9ERS2, Q3UHD9, P54775, P12367, Q9ESW4, P36536, Q9D0R2, Q5F2E8, Q8BIJ6, Q8BGR6, Q91V92, Q61316, Q9D0R2, Q9CZD3, Q9ERD7, Q3U0V1, Q61699                                                         |  |
| nucleus               | GOTERM_MF_FAT   | GO:0032555-purine ribonucleotide binding           | 41 | 16.80  | 0.000492838 | P32921, Q5F2E8, Q8BIJ6, Q91V92, Q8BGR6, Q64737, Q61316, Q9QXL2, Q80Z11, Q8BLY2, Q9JKR6, Q8CHH9, Q8BU30, Q70161, Q9JMH9, P70336, P28740, Q61035, P48722, P08556, Q3UU96, P26638, P39054, Q35609, P63001, Q8CC88, Q8BGQ7, Q05920, P58281, Q9CZD3, Q5XJV6, Q3UHD9, Q9ERS2, P54775, P12367, Q9ERD7, Q3U0V1, Q9ESW4, P36536, Q61699, Q9D0R2 |  |
| nucleus               | GOTERM_MF_FAT   | GO:0032553-ribonucleotide binding                  | 41 | 16.80  | 0.000492838 | P32921, Q5F2E8, Q8BIJ6, Q91V92, Q8BGR6, Q64737, Q61316, Q9QXL2, Q80Z11, Q8BLY2, Q9JKR6, Q8CHH9, Q8BU30, Q70161, Q9JMH9, P70336, P28740, Q61035, P48722, P08556, Q3UU96, P26638, P39054, Q35609, P63001, Q8CC88, Q8BGQ7, Q05920, P58281, Q9CZD3, Q5XJV6, Q3UHD9, Q9ERS2, P54775, P12367, Q9ERD7, Q3U0V1, Q9ESW4, P36536, Q61699, Q9D0R2 |  |
| nucleus               | GOTERM_MF_FAT   | GO:0017076-purine nucleotide binding               | 41 | 16.80  | 0.001110125 | P32921, Q5F2E8, Q8BIJ6, Q91V92, Q8BGR6, Q64737, Q61316, Q9QXL2, Q80Z11, Q8BLY2, Q9JKR6, Q8CHH9, Q8BU30, Q70161, Q9JMH9, P70336, P28740, Q61035, P48722, P08556, Q3UU96, P26638, P39054, Q35609, P63001, Q8CC88, Q8BGQ7, Q05920, P58281, Q9CZD3, Q5XJV6, Q3UHD9, Q9ERS2, P54775, P12367, Q9ERD7, Q3U0V1, Q9ESW4, P36536, Q61699, Q9D0R2 |  |
| nucleus               | SP_PIR_KEYWORDS | nucleotide-binding                                 | 38 | 15.57  | 0.001195881 | P32921, Q5F2E8, Q8BIJ6, Q91V92, Q8BGR6, Q64737, Q61316, Q80Z11, Q9QXL2, Q8BLY2, Q9JKR6, Q8CHH9, Q8BU30, Q70161, Q9JMH9, P70336, P28740, Q61035, P48722, P08556, Q3UU96, P26638, P39054, P63001, Q8CC88, Q8BGQ7, Q05920, P58281, Q9CZD3, Q5XJV6, Q3UHD9, P54775, P12367, Q9ERD7, Q9ESW4, P36536, Q61699, Q9D0R2                         |  |
| nucleus               | GOTERM_MF_FAT   | GO:0032559-adenyl ribonucleotide binding           | 32 | 13.11  | 0.004884217 | P32921, Q5F2E8, Q8BIJ6, Q91V92, Q64737, Q61316, Q9QXL2, Q8BLY2, Q9JKR6, Q8BU30, Q70161, Q9JMH9, P70336, P28740, Q61035, P48722, Q3UU96, P26638, Q35609, Q8CC88, Q8BGQ7, Q05920, Q9CZD3, Q5XJV6, Q3UHD9, Q9ERS2, P54775, P12367, Q3U0V1, Q9ESW4, Q61699, Q9D0R2                                                                         |  |
| nucleus               | GOTERM_MF_FAT   | GO:0005524-ATP binding                             | 31 | 12.70  | 0.007579659 | P32921, Q5F2E8, Q8BIJ6, Q91V92, Q64737, Q61316, Q9QXL2, Q8BLY2, Q9JKR6, Q8BU30, Q70161, Q9JMH9, P70336, P28740, Q61035, P48722, Q3UU96, P26638, Q35609, Q8CC88, Q8BGQ7, Q05920, Q9CZD3, Q5XJV6, Q3UHD9, Q9ERS2, P54775, Q3U0V1, Q9ESW4, Q61699, Q9D0R2                                                                                 |  |
| nucleus               | GOTERM_MF_FAT   | GO:0030554-adenyl nucleotide binding               | 32 | 13.11  | 0.009943467 | P32921, Q5F2E8, Q8BIJ6, Q91V92, Q64737, Q61316, Q9QXL2, Q8BLY2, Q9JKR6, Q8BU30, Q70161, Q9JMH9, P70336, P28740, Q61035, P48722, Q3UU96, P26638, Q35609, Q8CC88, Q8BGQ7, Q05920, Q9CZD3, Q5XJV6, Q3UHD9, Q9ERS2, P54775, P12367, Q3U0V1, Q9ESW4, Q61699, Q9D0R2                                                                         |  |
| nucleus               | GOTERM_MF_FAT   | GO:0001883-purine nucleoside binding               | 32 | 13.11  | 0.011156858 | P32921, Q5F2E8, Q8BIJ6, Q91V92, Q64737, Q61316, Q9QXL2, Q8BLY2, Q9JKR6, Q8BU30, Q70161, Q9JMH9, P70336, P28740, Q61035, P48722, Q3UU96, P26638, Q35609, Q8CC88, Q8BGQ7, Q05920, Q9CZD3, Q5XJV6, Q3UHD9, Q9ERS2, P54775, P12367, Q3U0V1, Q9ESW4, Q61699, Q9D0R2                                                                         |  |
| nucleus               | GOTERM_MF_FAT   | GO:0001882-nucleoside binding                      | 32 | 13.11  | 0.012171139 | P32921, Q5F2E8, Q8BIJ6, Q91V92, Q64737, Q61316, Q9QXL2, Q8BLY2, Q9JKR6, Q8BU30, Q70161, Q9JMH9, P70336, P28740, Q61035, P48722, Q3UU96, P26638, Q35609, Q8CC88, Q8BGQ7, Q05920, Q9CZD3, Q5XJV6, Q3UHD9, Q9ERS2, P54775, P12367, Q3U0V1, Q9ESW4, Q61699, Q9D0R2                                                                         |  |
| nucleus               | SP_PIR_KEYWORDS | atp-binding                                        | 27 | 11.07  | 0.025655606 | P32921, Q5F2E8, Q8BIJ6, Q91V92, Q64737, Q61316, Q9QXL2, Q8BLY2, Q9JKR6, Q70161, Q8BU30, Q9JMH9, P70336, P28740, Q61035, P48722, Q3UU96, P26638, Q8CC88, Q8BGQ7, Q05920, Q5XJV6, Q9CZD3, P54775, Q9ESW4, Q61699, Q9D0R2                                                                                                                 |  |
| nucleus               | UP_SEQ_FEATURE  | nucleotide phosphate-binding region:ATP            | 13 | 5.33   | 0.727943076 | P70336, P28740, Q3UU96, Q5F2E8, P26638, Q8CC88, Q91V92, Q64737, Q5XJV6, Q9CZD3, P54775, Q9QXL2, Q9JMH9                                                                                                                                                                                                                                 |  |
| Annotation Cluster 10 |                 | Enrichment Score: 2.3084847897649343               |    |        |             |                                                                                                                                                                                                                                                                                                                                        |  |
| Category              | Term            | Count                                              | %  | PValue | Genes       |                                                                                                                                                                                                                                                                                                                                        |  |
| ?                     | GOTERM_MF_FAT   | GO:0019899-enzyme binding                          | 12 | 4.92   | 0.000226292 | Q811D0, Q8BVQ5, Q7TMB8, Q3UHD9, Q9D5V5, Q58A65, Q8QZ77, Q0GNC1, Q9JL26, Q8BMI3, Q8BPM0, Q91YE6                                                                                                                                                                                                                                         |  |
| ?                     | GOTERM_MF_FAT   | GO:0031267-small GTPase binding                    | 6  | 2.46   | 0.001054313 | Q7TMB8, Q0GNC1, Q9JL26, Q8BMI3, Q8BPM0, Q91YE6                                                                                                                                                                                                                                                                                         |  |
| ?                     | GOTERM_MF_FAT   | GO:0051020-GTPase binding                          | 6  | 2.46   | 0.001320235 | Q7TMB8, Q0GNC1, Q9JL26, Q8BMI3, Q8BPM0, Q91YE6                                                                                                                                                                                                                                                                                         |  |
| ?                     | GOTERM_MF_FAT   | GO:0017048-Rho GTPase binding                      | 4  | 1.64   | 0.003707759 | Q7TMB8, Q0GNC1, Q9JL26, Q8BPM0                                                                                                                                                                                                                                                                                                         |  |
| ?                     | INTERPRO        | IPR010472:Diaphanous FH3                           | 3  | 1.23   | 0.005755969 | Q0GNC1, Q9JL26, Q8BPM0                                                                                                                                                                                                                                                                                                                 |  |
| ?                     | INTERPRO        | IPR010473:Diaphanous GTPase-binding                | 3  | 1.23   | 0.005755969 | Q0GNC1, Q9JL26, Q8BPM0                                                                                                                                                                                                                                                                                                                 |  |
| ?                     | GOTERM_MF_FAT   | GO:0017016-Ras GTPase binding                      | 5  | 2.05   | 0.00667251  | Q7TMB8, Q0GNC1, Q9JL26, Q8BPM0, Q91YE6                                                                                                                                                                                                                                                                                                 |  |
| ?                     | SMART           | SM00498:FH2                                        | 3  | 1.23   | 0.008095074 | Q0GNC1, Q9JL26, Q8BPM0                                                                                                                                                                                                                                                                                                                 |  |
| ?                     | INTERPRO        | IPR014768:GTPase-binding/formin homology 3         | 3  | 1.23   | 0.008643849 | Q0GNC1, Q9JL26, Q8BPM0                                                                                                                                                                                                                                                                                                                 |  |
| ?                     | UP_SEQ_FEATURE  | domain:GBD/FH3                                     | 3  | 1.23   | 0.011513986 | Q0GNC1, Q9JL26, Q8BPM0                                                                                                                                                                                                                                                                                                                 |  |
| ?                     | INTERPRO        | IPR003104:Actin-binding FH2 and DRF autoregulatory | 3  | 1.23   | 0.013938269 | Q0GNC1, Q9JL26, Q8BPM0                                                                                                                                                                                                                                                                                                                 |  |
| ?                     | INTERPRO        | IPR015425:Actin-binding FH2                        | 3  | 1.23   | 0.015945537 | Q0GNC1, Q9JL26, Q8BPM0                                                                                                                                                                                                                                                                                                                 |  |
| ?                     | UP_SEQ_FEATURE  | domain:FH2                                         | 3  | 1.23   | 0.021123641 | Q0GNC1, Q9JL26, Q8BPM0                                                                                                                                                                                                                                                                                                                 |  |
| Annotation Cluster 11 |                 | Enrichment Score: 2.2614695977784343               |    |        |             |                                                                                                                                                                                                                                                                                                                                        |  |
| Category              | Term            | Count                                              | %  | PValue | Genes       |                                                                                                                                                                                                                                                                                                                                        |  |
| vesicle               | GOTERM_BP_FAT   | GO:0016192-vesicle-mediated transport              | 20 | 8.20   | 1.71788E-05 | Q810B6, O54774, Q6PAR5, Q9QW16, P08556, P84091, O08585, P63001, P39054, Q9CQW1, Q9JKD3, Q9CR95, Q62277, Q9CZD3, Q3UHD9, Q3UPL0, Q60902, Q8BMI3, P84086, P36536                                                                                                                                                                         |  |
| vesicle               | GOTERM_BP_FAT   | GO:0016044-membrane organization                   | 10 | 4.10   | 0.011470941 | Q62277, Q810B6, Q811D0, Q6PAR5, P08556, Q60902, P63001, P39054, Q9CR95, P58281                                                                                                                                                                                                                                                         |  |
| vesicle               | GOTERM_BP_FAT   | GO:0010324-membrane invagination                   | 8  | 3.28   | 0.013808932 | Q62277, Q810B6, Q6PAR5, P08556, Q60902, P63001, P39054, Q9CR95                                                                                                                                                                                                                                                                         |  |
| vesicle               | GOTERM_BP_FAT   | GO:0006897-endocytosis                             | 8  | 3.28   | 0.013808932 | Q62277, Q810B6, Q6PAR5, P08556, Q60902, P63001, P39054, Q9CR95                                                                                                                                                                                                                                                                         |  |

|              |                                |                                                                |       |       |             |                                                                                                                                                                                                                                                                                                                                                |
|--------------|--------------------------------|----------------------------------------------------------------|-------|-------|-------------|------------------------------------------------------------------------------------------------------------------------------------------------------------------------------------------------------------------------------------------------------------------------------------------------------------------------------------------------|
| vesicle      | SP_PIR_KEYWORDS                | Endocytosis                                                    | 4     | 1.64  | 0.131141263 | Q6PAR5, Q60902, P39054, Q9CR95                                                                                                                                                                                                                                                                                                                 |
|              | Annotation Cluster 12 Category | Enrichment Score: 2.1497048119978475                           |       |       |             |                                                                                                                                                                                                                                                                                                                                                |
|              |                                | Term                                                           | Count | %     | PValue      | Genes                                                                                                                                                                                                                                                                                                                                          |
| mitochondria | KEGG_PATHWAY                   | mmu00020:Citrate cycle (TCA cycle)                             | 7     | 2.87  | 1.1765E-05  | P54071, P28271, Q60597, Q91V92, Q05920, Q9CZU6, Q9D051                                                                                                                                                                                                                                                                                         |
| mitochondria | GOTERM_BP_FAT                  | GO:0045333-cellular respiration                                | 7     | 2.87  | 0.000137001 | Q9CPP6, P54071, P28271, Q8BWF0, Q9CZU6, Q8BH59, P03893                                                                                                                                                                                                                                                                                         |
| mitochondria | GOTERM_BP_FAT                  | GO:0015980-energy derivation by oxidation of organic compounds | 8     | 3.28  | 0.000353351 | Q9CPP6, P54071, P05201, P28271, Q8BWF0, Q9CZU6, Q8BH59, P03893                                                                                                                                                                                                                                                                                 |
| mitochondria | GOTERM_BP_FAT                  | GO:0022904-respiratory electron transport chain                | 4     | 1.64  | 0.006145474 | Q9CPP6, Q8BWF0, Q8BH59, P03893                                                                                                                                                                                                                                                                                                                 |
| mitochondria | GOTERM_BP_FAT                  | GO:0006084-acetyl-CoA metabolic process                        | 4     | 1.64  | 0.008187358 | P54071, P28271, Q91V92, Q9CZU6                                                                                                                                                                                                                                                                                                                 |
| mitochondria | GOTERM_BP_FAT                  | GO:0006732-coenzyme metabolic process                          | 7     | 2.87  | 0.012868992 | Q9CQ60, P54071, P28271, Q00612, Q8BWF0, Q91V92, Q9CZU6                                                                                                                                                                                                                                                                                         |
| mitochondria | SP_PIR_KEYWORDS                | tricarboxylic acid cycle                                       | 3     | 1.23  | 0.026678973 | P54071, P28271, Q9CZU6                                                                                                                                                                                                                                                                                                                         |
| mitochondria | GOTERM_BP_FAT                  | GO:0051186-cofactor metabolic process                          | 7     | 2.87  | 0.036662093 | Q9CQ60, P54071, P28271, Q00612, Q8BWF0, Q91V92, Q9CZU6                                                                                                                                                                                                                                                                                         |
| mitochondria | GOTERM_BP_FAT                  | GO:0006099-tricarboxylic acid cycle                            | 3     | 1.23  | 0.03792115  | P54071, P28271, Q9CZU6                                                                                                                                                                                                                                                                                                                         |
| mitochondria | GOTERM_BP_FAT                  | GO:0046356-acetyl-CoA catabolic process                        | 3     | 1.23  | 0.041009496 | P54071, P28271, Q9CZU6                                                                                                                                                                                                                                                                                                                         |
| mitochondria | GOTERM_BP_FAT                  | GO:0009060-aerobic respiration                                 | 3     | 1.23  | 0.050810278 | P54071, P28271, Q9CZU6                                                                                                                                                                                                                                                                                                                         |
| mitochondria | GOTERM_BP_FAT                  | GO:0009109-coenzyme catabolic process                          | 3     | 1.23  | 0.057761477 | P54071, P28271, Q9CZU6                                                                                                                                                                                                                                                                                                                         |
| mitochondria | GOTERM_BP_FAT                  | GO:0051187-cofactor catabolic process                          | 3     | 1.23  | 0.068758818 | P54071, P28271, Q9CZU6                                                                                                                                                                                                                                                                                                                         |
|              | Annotation Cluster 13 Category | Enrichment Score: 2.019674351083093                            |       |       |             |                                                                                                                                                                                                                                                                                                                                                |
|              |                                | Term                                                           | Count | %     | PValue      | Genes                                                                                                                                                                                                                                                                                                                                          |
|              | INTERPRO                       | IPR001412:Aminoacyl-tRNA synthetase, class I, conserved site   | 5     | 2.05  | 0.000966728 | P32921, P17047, Q3U0V1, Q8BIJ6, Q8BU30                                                                                                                                                                                                                                                                                                         |
|              | INTERPRO                       | IPR014729:Rossmann-like alpha/beta/alpha sandwich fold         | 4     | 1.64  | 0.015230699 | P32921, Q9DCW4, Q8BIJ6, Q8BU30                                                                                                                                                                                                                                                                                                                 |
|              | UP_SEQ_FEATURE                 | short sequence motif:"KMSKS" region                            | 3     | 1.23  | 0.021123641 | P32921, Q8BIJ6, Q8BU30                                                                                                                                                                                                                                                                                                                         |
|              | UP_SEQ_FEATURE                 | short sequence motif:"HIGH" region                             | 3     | 1.23  | 0.026823141 | P32921, Q8BIJ6, Q8BU30                                                                                                                                                                                                                                                                                                                         |
|              | Annotation Cluster 14 Category | Enrichment Score: 1.9459507548476633                           |       |       |             |                                                                                                                                                                                                                                                                                                                                                |
|              |                                | Term                                                           | Count | %     | PValue      | Genes                                                                                                                                                                                                                                                                                                                                          |
| transport    | SP_PIR_KEYWORDS                | transport                                                      | 42    | 17.21 | 3.09961E-05 | Q9CPP6, Q791T5, P97441, O54774, Q9D1C8, P97493, Q8BKCS, Q8BY89, Q9CR95, Q9CQV7, Q8BH59, Q9DCW4, P63080, P61971, Q9EPR4, Q8JZR6, P97450, Q9CPW2, P84091, P54285, Q9CQ85, Q9CQW1, O35609, P56382, Q9CQ69, Q8BTY2, Q91YE6, Q9JKD3, P61620, Q9DCP2, Q9ERS2, Q8C0L0, P47802, O35683, Q3UPL0, Q3U0V1, Q8BBI3, P84086, P36536, Q9ERU9, Q9QUH0, P03893 |
| transport    | SP_PIR_KEYWORDS                | protein transport                                              | 18    | 7.38  | 0.000183925 | O54774, Q9D1C8, P84091, Q9CQ85, O35609, Q9CQW1, Q91YE6, Q9JKD3, Q8BKCS, P61620, Q9CR95, Q9CQV7, P47802, Q3UPL0, Q8BBI3, Q9ERU9, P36536, P61971                                                                                                                                                                                                 |
| transport    | GOTERM_BP_FAT                  | GO:0046907-intracellular transport                             | 17    | 6.97  | 0.000239885 | O54774, Q92122, P84091, O08585, O35609, Q9CQW1, Q91YE6, Q8BKCS, P61620, Q03173, Q8BH59, Q3UHD9, P47802, Q8BBI3, Q9ERU9, P36536, P61971                                                                                                                                                                                                         |
| transport    | GOTERM_BP_FAT                  | GO:0015031-protein transport                                   | 20    | 8.20  | 0.001252975 | O54774, Q9D1C8, P84091, O08585, Q9CQ85, O35609, Q9CQW1, Q91YE6, Q9JKD3, Q8BKCS, P61620, Q9CR95, Q9CQV7, P50396, P47802, Q3UPL0, Q8BBI3, Q9ERU9, P36536, P61971                                                                                                                                                                                 |
| transport    | GOTERM_BP_FAT                  | GO:0045184-establishment of protein localization               | 20    | 8.20  | 0.001369251 | O54774, Q9D1C8, P84091, O08585, Q9CQ85, O35609, Q9CQW1, Q91YE6, Q9JKD3, Q8BKCS, P61620, Q9CR95, Q9CQV7, P50396, P47802, Q3UPL0, Q8BBI3, Q9ERU9, P36536, P61971                                                                                                                                                                                 |
| transport    | GOTERM_MF_FAT                  | GO:0008565-protein transporter activity                        | 6     | 2.46  | 0.001747965 | O54774, Q9CQ85, Q91YE6, Q8BKCS, P61971, P61620                                                                                                                                                                                                                                                                                                 |
| transport    | GOTERM_BP_FAT                  | GO:0008104-protein localization                                | 21    | 8.61  | 0.002842801 | Q811D0, O54774, Q9D1C8, P84091, O08585, Q9CQ85, O35609, Q9CQW1, Q91YE6, Q9JKD3, Q8BKCS, P61620, Q9CR95, Q9CQV7, P50396, P47802, Q3UPL0, Q8BBI3, Q9ERU9, P36536, P61971                                                                                                                                                                         |
| transport    | GOTERM_BP_FAT                  | GO:0006886-intracellular protein transport                     | 11    | 4.51  | 0.004229125 | O54774, P47802, P84091, O08585, O35609, Q8BBI3, Q91YE6, Q8BKCS, P61971, P36536, P61620                                                                                                                                                                                                                                                         |
| transport    | GOTERM_BP_FAT                  | GO:0034613-cellular protein localization                       | 11    | 4.51  | 0.007363292 | O54774, P47802, P84091, O08585, O35609, Q8BBI3, Q91YE6, Q8BKCS, P61971, P36536, P61620                                                                                                                                                                                                                                                         |
| transport    | GOTERM_BP_FAT                  | GO:0070727-cellular macromolecule localization                 | 11    | 4.51  | 0.007674998 | O54774, P47802, P84091, O08585, O35609, Q8BBI3, Q91YE6, Q8BKCS, P61971, P36536, P61620                                                                                                                                                                                                                                                         |
| transport    | GOTERM_BP_FAT                  | GO:0017038-protein import                                      | 4     | 1.64  | 0.098672146 | P47802, Q91YE6, Q8BKCS, P61971                                                                                                                                                                                                                                                                                                                 |
| transport    | GOTERM_BP_FAT                  | GO:0033365-protein localization in organelle                   | 4     | 1.64  | 0.142674735 | P47802, Q91YE6, Q8BKCS, P61971                                                                                                                                                                                                                                                                                                                 |
| transport    | GOTERM_BP_FAT                  | GO:0006606-protein import into nucleus                         | 3     | 1.23  | 0.174053675 | Q91YE6, Q8BKCS, P61971                                                                                                                                                                                                                                                                                                                         |
| transport    | GOTERM_BP_FAT                  | GO:0051170-nuclear import                                      | 3     | 1.23  | 0.183722534 | Q91YE6, Q8BKCS, P61971                                                                                                                                                                                                                                                                                                                         |
| transport    | GOTERM_BP_FAT                  | GO:0034504-protein localization in nucleus                     | 3     | 1.23  | 0.198365303 | Q91YE6, Q8BKCS, P61971                                                                                                                                                                                                                                                                                                                         |
| transport    | GOTERM_BP_FAT                  | GO:0006605-protein targeting                                   | 4     | 1.64  | 0.266345259 | P47802, Q91YE6, Q8BKCS, P61971                                                                                                                                                                                                                                                                                                                 |
| transport    | GOTERM_BP_FAT                  | GO:0006913-nucleocytoplasmic transport                         | 3     | 1.23  | 0.371717581 | Q91YE6, Q8BKCS, P61971                                                                                                                                                                                                                                                                                                                         |
| transport    | GOTERM_BP_FAT                  | GO:0051169-nuclear transport                                   | 3     | 1.23  | 0.381346352 | Q91YE6, Q8BKCS, P61971                                                                                                                                                                                                                                                                                                                         |
|              | Annotation Cluster 15 Category | Enrichment Score: 1.8048666178879997                           |       |       |             |                                                                                                                                                                                                                                                                                                                                                |
|              |                                | Term                                                           | Count | %     | PValue      | Genes                                                                                                                                                                                                                                                                                                                                          |
| metabolism   | GOTERM_BP_FAT                  | GO:0006006-glucose metabolic process                           | 8     | 3.28  | 0.002863061 | Q9CQ60, Q60597, Q00612, P06745, Q8BWF0, Q05920, Q9D051, P05063                                                                                                                                                                                                                                                                                 |

|              |                       |                                                                   |       |       |             |                                                                                                                                                                                                                                        |
|--------------|-----------------------|-------------------------------------------------------------------|-------|-------|-------------|----------------------------------------------------------------------------------------------------------------------------------------------------------------------------------------------------------------------------------------|
| metabolism   | GOTERM_BP_FAT         | GO:0019320-hexose catabolic process                               | 5     | 2.05  | 0.005208823 | Q9CQ60, Q60597, P06745, Q9D051, P05063                                                                                                                                                                                                 |
| metabolism   | GOTERM_BP_FAT         | GO:0006007-glucose catabolic process                              | 5     | 2.05  | 0.005208823 | Q9CQ60, Q60597, P06745, Q9D051, P05063                                                                                                                                                                                                 |
| metabolism   | GOTERM_BP_FAT         | GO:0046365-monosaccharide catabolic process                       | 5     | 2.05  | 0.005959671 | Q9CQ60, Q60597, P06745, Q9D051, P05063                                                                                                                                                                                                 |
| metabolism   | GOTERM_BP_FAT         | GO:0019318-hexose metabolic process                               | 8     | 3.28  | 0.007952654 | Q9CQ60, Q60597, Q00612, P06745, Q8BWF0, Q05920, Q9D051, P05063                                                                                                                                                                         |
| metabolism   | GOTERM_BP_FAT         | GO:0044275-cellular carbohydrate catabolic process                | 5     | 2.05  | 0.008635188 | Q9CQ60, Q60597, P06745, Q9D051, P05063                                                                                                                                                                                                 |
| metabolism   | KEGG_PATHWAY          | mmu00030:Penose phosphate pathway                                 | 4     | 1.64  | 0.009713434 | Q9CQ60, Q00612, P06745, P05063                                                                                                                                                                                                         |
| metabolism   | GOTERM_BP_FAT         | GO:0046164-alcohol catabolic process                              | 5     | 2.05  | 0.011385105 | Q9CQ60, Q60597, P06745, Q9D051, P05063                                                                                                                                                                                                 |
| metabolism   | GOTERM_BP_FAT         | GO:0005996-monosaccharide metabolic process                       | 8     | 3.28  | 0.014790091 | Q9CQ60, Q60597, Q00612, P06745, Q8BWF0, Q05920, Q9D051, P05063                                                                                                                                                                         |
| metabolism   | SP_PIR_KEYWORDS       | glycolysis                                                        | 4     | 1.64  | 0.018937662 | Q60597, P06745, Q9D051, P05063                                                                                                                                                                                                         |
| metabolism   | GOTERM_BP_FAT         | GO:0006096-glycolysis                                             | 4     | 1.64  | 0.021246031 | Q60597, P06745, Q9D051, P05063                                                                                                                                                                                                         |
| metabolism   | SP_PIR_KEYWORDS       | gluconeogenesis                                                   | 3     | 1.23  | 0.021595623 | P06745, Q05920, P05063                                                                                                                                                                                                                 |
| metabolism   | GOTERM_BP_FAT         | GO:0016052-carbohydrate catabolic process                         | 5     | 2.05  | 0.023730749 | Q9CQ60, Q60597, P06745, Q9D051, P05063                                                                                                                                                                                                 |
| metabolism   | UP_SEQ_FEATURE        | binding site:Substrate                                            | 7     | 2.87  | 0.23994563  | Q9CZD3, P54071, P52196, Q00612, Q8BWF0, Q05920, P05063                                                                                                                                                                                 |
| metabolism   | KEGG_PATHWAY          | mmu00010:Glycolysis / Gluconeogenesis                             | 3     | 1.23  | 0.328556443 | P06745, Q9D051, P05063                                                                                                                                                                                                                 |
| neuron       | Annotation Cluster 16 | Enrichment Score: 1.7607233191133849                              |       |       |             |                                                                                                                                                                                                                                        |
| neuron       | Category              | Term                                                              | Count | %     | PValue      | Genes                                                                                                                                                                                                                                  |
| neuron       | SP_PIR_KEYWORDS       | synapse                                                           | 11    | 4.51  | 0.000653926 | Q62277, P97441, Q811D0, Q7TMB8, Q80U40, P39054, Q6PFD5, P63080, Q9JKD3, Q03173, Q4ACU6                                                                                                                                                 |
| neuron       | SP_PIR_KEYWORDS       | cell junction                                                     | 14    | 5.74  | 0.002681595 | P97441, Q811D0, Q8BIW1, P39054, Q6PFD5, Q9JKD3, Q03173, Q61301, Q4ACU6, Q62277, Q7TMB8, Q80U40, P63080, O70161                                                                                                                         |
| neuron       | GOTERM_CC_FAT         | GO:0045202-synapse                                                | 12    | 4.92  | 0.005268321 | Q62277, P97441, Q811D0, Q7TMB8, Q80U40, P39054, Q6PFD5, P63080, P84086, Q9JKD3, Q03173, Q4ACU6                                                                                                                                         |
| neuron       | GOTERM_CC_FAT         | GO:0030054-cell junction                                          | 15    | 6.15  | 0.006310061 | P97441, Q811D0, Q8BIW1, P39054, Q6PFD5, Q9JKD3, Q03173, Q61301, Q4ACU6, Q62277, Q9QYB5, Q7TMB8, Q80U40, P63080, O70161                                                                                                                 |
| neuron       | GOTERM_CC_FAT         | GO:0014069-postsynaptic density                                   | 4     | 1.64  | 0.03438038  | Q811D0, P39054, Q6PFD5, Q4ACU6                                                                                                                                                                                                         |
| neuron       | SP_PIR_KEYWORDS       | postsynaptic cell membrane                                        | 5     | 2.05  | 0.061898307 | Q811D0, P39054, Q6PFD5, P63080, Q4ACU6                                                                                                                                                                                                 |
| neuron       | GOTERM_CC_FAT         | GO:0044456-synapse part                                           | 7     | 2.87  | 0.077504403 | Q62277, Q811D0, P39054, Q6PFD5, P63080, Q9JKD3, Q4ACU6                                                                                                                                                                                 |
| neuron       | GOTERM_CC_FAT         | GO:0045211-postsynaptic membrane                                  | 5     | 2.05  | 0.10054284  | Q811D0, P39054, Q6PFD5, P63080, Q4ACU6                                                                                                                                                                                                 |
| neuron       | GOTERM_CC_FAT         | GO:0044459-plasma membrane part                                   | 29    | 11.89 | 0.147297655 | O54774, P97441, Q640R3, Q03173, Q80Z11, P63080, O70161, Q9EPR4, Q811D0, Q8BIW1, P08556, P84091, O08585, P54285, P63001, P39054, Q9CQW1, Q6PFD5, Q8BTY2, Q9JKD3, Q4ACU6, Q61301, Q9DCP2, Q62277, Q9QYB5, Q7TMB8, Q80U40, Q3UPL0, O88653 |
|              | Annotation Cluster 17 | Enrichment Score: 1.6437148860724222                              |       |       |             |                                                                                                                                                                                                                                        |
|              | Category              | Term                                                              | Count | %     | PValue      | Genes                                                                                                                                                                                                                                  |
| vesicle      | GOTERM_BP_FAT         | GO:0033043-regulation of organelle organization                   | 9     | 3.69  | 0.001139755 | P54227, Q811D0, P70336, Q9CPW4, P63001, P27546, Q8BRT1, Q3U487, Q7TSC1                                                                                                                                                                 |
| cytoskeleton | GOTERM_BP_FAT         | GO:0051493-regulation of cytoskeleton organization                | 7     | 2.87  | 0.00218769  | P54227, Q811D0, P70336, Q9CPW4, P63001, P27546, Q8BRT1                                                                                                                                                                                 |
| vesicle      | GOTERM_BP_FAT         | GO:0010638-positive regulation of organelle organization          | 4     | 1.64  | 0.032806223 | Q811D0, P70336, P63001, Q7TSC1                                                                                                                                                                                                         |
| vesicle      | GOTERM_BP_FAT         | GO:0051130-positive regulation of cellular component organization | 4     | 1.64  | 0.226748912 | Q811D0, P70336, P63001, Q7TSC1                                                                                                                                                                                                         |
|              | GOTERM_BP_FAT         | GO:0051726-regulation of cell cycle                               | 5     | 2.05  | 0.325931904 | Q811D0, P70336, P08556, Q3U487, Q7TSC1                                                                                                                                                                                                 |
|              | Annotation Cluster 18 | Enrichment Score: 1.5702384614450258                              |       |       |             |                                                                                                                                                                                                                                        |
|              | Category              | Term                                                              | Count | %     | PValue      | Genes                                                                                                                                                                                                                                  |
|              | INTERPRO              | IPR011989:Armillo-like helical                                    | 8     | 3.28  | 0.001607437 | O54774, P98203, Q9D0L7, Q148V7, Q8BRT1, Q91YE6, Q8BKCS, Q6PDI5                                                                                                                                                                         |
|              | UP_SEQ_FEATURE        | repeat:HEAT 3                                                     | 4     | 1.64  | 0.024057444 | Q148V7, Q8BRT1, Q8BKCS, Q6PDI5                                                                                                                                                                                                         |
|              | INTERPRO              | IPR000357:HEAT                                                    | 4     | 1.64  | 0.024718434 | Q148V7, Q8BRT1, Q8BKCS, Q6PDI5                                                                                                                                                                                                         |
|              | UP_SEQ_FEATURE        | repeat:HEAT 1                                                     | 4     | 1.64  | 0.036153008 | Q148V7, Q8BRT1, Q8BKCS, Q6PDI5                                                                                                                                                                                                         |
|              | UP_SEQ_FEATURE        | repeat:HEAT 2                                                     | 4     | 1.64  | 0.036153008 | Q148V7, Q8BRT1, Q8BKCS, Q6PDI5                                                                                                                                                                                                         |
|              | UP_SEQ_FEATURE        | repeat:HEAT 5                                                     | 3     | 1.23  | 0.075517389 | Q8BRT1, Q8BKCS, Q6PDI5                                                                                                                                                                                                                 |
|              | UP_SEQ_FEATURE        | repeat:HEAT 4                                                     | 3     | 1.23  | 0.108041453 | Q8BRT1, Q8BKCS, Q6PDI5                                                                                                                                                                                                                 |
|              | Annotation Cluster 19 | Enrichment Score: 1.5317195433539386                              |       |       |             |                                                                                                                                                                                                                                        |
|              | Category              | Term                                                              | Count | %     | PValue      | Genes                                                                                                                                                                                                                                  |
| vesicle      | GOTERM_CC_FAT         | GO:0030117-membrane coat                                          | 5     | 2.05  | 0.008741949 | O54774, P84091, O08585, Q8BMI3, Q9CR95                                                                                                                                                                                                 |
| vesicle      | GOTERM_CC_FAT         | GO:0048475-coated membrane                                        | 5     | 2.05  | 0.008741949 | O54774, P84091, O08585, Q8BMI3, Q9CR95                                                                                                                                                                                                 |
| vesicle      | GOTERM_CC_FAT         | GO:0005905-coated pit                                             | 4     | 1.64  | 0.009922536 | Q60902, P84091, O08585, Q9CR95                                                                                                                                                                                                         |
| vesicle      | GOTERM_CC_FAT         | GO:0030118-clathrin coat                                          | 4     | 1.64  | 0.011730014 | P84091, O08585, Q8BMI3, Q9CR95                                                                                                                                                                                                         |
| vesicle      | GOTERM_CC_FAT         | GO:0044431-Golgi apparatus part                                   | 6     | 2.46  | 0.214649849 | O54774, O08585, O35609, Q8BMI3, Q9JKD3, Q8CDG3                                                                                                                                                                                         |

|               |                       |                                                                    |       |      |             |                                                                                                                        |
|---------------|-----------------------|--------------------------------------------------------------------|-------|------|-------------|------------------------------------------------------------------------------------------------------------------------|
| vesicle       | KEGG_PATHWAY          | mmu04142:Lysosome                                                  | 4     | 1.64 | 0.337920379 | O54774, P17047, O08585, Q8BMI3                                                                                         |
|               | Annotation Cluster 20 | Enrichment Score: 1.4929887354234659                               |       |      |             |                                                                                                                        |
|               | Category              | Term                                                               | Count | %    | PValue      | Genes                                                                                                                  |
| ?             | SMART                 | SM00233:PH                                                         | 11    | 4.51 | 0.000234219 | Q8K394, P70336, Q3UHD9, Q5DU25, Q3UU96, P39054, Q8R4H2, Q8K3H0, Q7SIG6, Q3TES0, Q9QWY8                                 |
| ?             | UP_SEQ_FEATURE        | domain:PH                                                          | 11    | 4.51 | 0.0010517   | Q8K394, P70336, Q3UHD9, Q5DU25, Q3UU96, P39054, Q8R4H2, Q8K3H0, Q7SIG6, Q3TES0, Q9QWY8                                 |
| ?             | GOTERM_BP_FAT         | GO:0032012-regulation of ARF protein signal transduction           | 5     | 2.05 | 0.001643336 | Q3UHD9, Q5DU25, Q7SIG6, Q3TES0, Q9QWY8                                                                                 |
| ?             | INTERPRO              | IPR001849:Pleckstrin homology                                      | 11    | 4.51 | 0.002341219 | Q8K394, P70336, Q3UHD9, Q5DU25, Q3UU96, P39054, Q8R4H2, Q8K3H0, Q7SIG6, Q3TES0, Q9QWY8                                 |
| ?             | SP_PIR_KEYWORDS       | GTase activation                                                   | 8     | 3.28 | 0.002502672 | Q6PAR5, Q3UHD9, P50396, Q8R4H2, Q5SSM3, Q7SIG6, Q80UJ7, Q9QWY8                                                         |
| ?             | KEGG_PATHWAY          | mmu04144:Endocytosis                                               | 10    | 4.10 | 0.007763966 | Q3UHD9, Q9D1C8, Q5DU25, P84091, O08585, P39054, O70161, Q7SIG6, Q3TES0, Q9QWY8                                         |
| ?             | GOTERM_MF_FAT         | GO:0005083-small GTPase regulator activity                         | 9     | 3.69 | 0.009435403 | Q3UHD9, P50396, Q5DU25, Q3UU96, Q8R4H2, Q7SIG6, Q3TES0, Q80UJ7, Q9QWY8                                                 |
| ?             | GOTERM_MF_FAT         | GO:0005096-GTPase activator activity                               | 8     | 3.28 | 0.013640736 | Q6PAR5, Q3UHD9, P50396, Q8R4H2, Q5SSM3, Q7SIG6, Q80UJ7, Q9QWY8                                                         |
| ?             | GOTERM_MF_FAT         | GO:0008047-enzyme activator activity                               | 9     | 3.69 | 0.017428527 | Q6PAR5, Q3UHD9, P50396, Q88653, Q8R4H2, Q5SSM3, Q7SIG6, Q80UJ7, Q9QWY8                                                 |
| cytoskeleton  | SMART                 | SM00326:SH3                                                        | 7     | 2.87 | 0.017693808 | Q811D0, Q80U40, P54285, Q6P9K8, Q4ACU6, Q7SIG6, Q9QWY8                                                                 |
| ?             | SMART                 | SM00105:ArfGap                                                     | 3     | 1.23 | 0.021251929 | Q3UHD9, Q7SIG6, Q9QWY8                                                                                                 |
| ?             | GOTERM_MF_FAT         | GO:0030695-GTPase regulator activity                               | 11    | 4.51 | 0.021285012 | Q6PAR5, Q3UHD9, P50396, Q5DU25, Q3UU96, Q8R4H2, Q5SSM3, Q7SIG6, Q3TES0, Q80UJ7, Q9QWY8                                 |
| cytoskeleton  | SMART                 | SM00248:ANK                                                        | 7     | 2.87 | 0.02255775  | Q810B6, Q3UHD9, Q6P9K8, Q4ACU6, Q7SIG6, Q9DBR7, Q9QWY8                                                                 |
| ?             | GOTERM_MF_FAT         | GO:0060589-nucleoside-triphosphatase regulator activity            | 11    | 4.51 | 0.023532628 | Q6PAR5, Q3UHD9, P50396, Q5DU25, Q3UU96, Q8R4H2, Q5SSM3, Q7SIG6, Q3TES0, Q80UJ7, Q9QWY8                                 |
| ?             | GOTERM_BP_FAT         | GO:0051056-regulation of small GTPase mediated signal transduction | 8     | 3.28 | 0.03495363  | Q6PAR5, Q3UHD9, P08556, Q5DU25, Q8R4H2, Q7SIG6, Q3TES0, Q9QWY8                                                         |
| ?             | GOTERM_BP_FAT         | GO:0046578-regulation of Ras protein signal transduction           | 7     | 2.87 | 0.035840007 | Q3UHD9, P08556, Q5DU25, Q8R4H2, Q7SIG6, Q3TES0, Q9QWY8                                                                 |
| ?             | INTERPRO              | IPR001164:Arf GTPase activating protein                            | 3     | 1.23 | 0.035890214 | Q3UHD9, Q7SIG6, Q9QWY8                                                                                                 |
| ?             | GOTERM_MF_FAT         | GO:0008060-ARF GTPase activator activity                           | 3     | 1.23 | 0.036403669 | Q3UHD9, Q7SIG6, Q9QWY8                                                                                                 |
| ?             | INTERPRO              | IPR011993:Pleckstrin homology-type                                 | 9     | 3.69 | 0.036499024 | P70336, Q9Z2H5, P39054, Q8R4H2, Q9ERU9, Q8K3H0, Q03173, Q7SIG6, Q9QWY8                                                 |
| ?             | GOTERM_BP_FAT         | GO:0032312-regulation of ARF GTPase activity                       | 3     | 1.23 | 0.03792115  | Q3UHD9, Q7SIG6, Q9QWY8                                                                                                 |
| ?             | UP_SEQ_FEATURE        | domain:Arf-GAP                                                     | 3     | 1.23 | 0.039814296 | Q3UHD9, Q7SIG6, Q9QWY8                                                                                                 |
| cytoskeleton  | SP_PIR_KEYWORDS       | sh3 domain                                                         | 7     | 2.87 | 0.058815594 | Q811D0, Q80U40, P54285, Q6P9K8, Q4ACU6, Q7SIG6, Q9QWY8                                                                 |
| cytoskeleton  | INTERPRO              | IPR001452:Src homology-3 domain                                    | 7     | 2.87 | 0.058937003 | Q811D0, Q80U40, P54285, Q6P9K8, Q4ACU6, Q7SIG6, Q9QWY8                                                                 |
| cytoskeleton  | UP_SEQ_FEATURE        | repeat:ANK 1                                                       | 7     | 2.87 | 0.071302013 | Q810B6, Q3UHD9, Q6P9K8, Q4ACU6, Q7SIG6, Q9DBR7, Q9QWY8                                                                 |
| cytoskeleton  | UP_SEQ_FEATURE        | repeat:ANK 2                                                       | 7     | 2.87 | 0.071302013 | Q810B6, Q3UHD9, Q6P9K8, Q4ACU6, Q7SIG6, Q9DBR7, Q9QWY8                                                                 |
| cytoskeleton  | INTERPRO              | IPR002110:Ankyrin                                                  | 7     | 2.87 | 0.072740926 | Q810B6, Q3UHD9, Q6P9K8, Q4ACU6, Q7SIG6, Q9DBR7, Q9QWY8                                                                 |
| cytoskeleton  | SP_PIR_KEYWORDS       | ank repeat                                                         | 7     | 2.87 | 0.080962301 | Q810B6, Q3UHD9, Q6P9K8, Q4ACU6, Q7SIG6, Q9DBR7, Q9QWY8                                                                 |
| cytoskeleton  | UP_SEQ_FEATURE        | domain:SH3                                                         | 6     | 2.46 | 0.102724546 | Q811D0, P54285, Q6P9K8, Q4ACU6, Q7SIG6, Q9QWY8                                                                         |
| cytoskeleton  | UP_SEQ_FEATURE        | repeat:ANK 6                                                       | 4     | 1.64 | 0.115078564 | Q810B6, Q6P9K8, Q4ACU6, Q9DBR7                                                                                         |
| ?             | GOTERM_BP_FAT         | GO:0043087-regulation of GTPase activity                           | 4     | 1.64 | 0.130360779 | Q3UHD9, P50396, Q7SIG6, Q9QWY8                                                                                         |
| cytoskeleton  | UP_SEQ_FEATURE        | repeat:ANK 5                                                       | 4     | 1.64 | 0.221481614 | Q810B6, Q6P9K8, Q4ACU6, Q9DBR7                                                                                         |
| ?             | GOTERM_BP_FAT         | GO:0051336-regulation of hydrolase activity                        | 5     | 2.05 | 0.273944968 | Q791T5, Q3UHD9, P50396, Q7SIG6, Q9QWY8                                                                                 |
| ?             | GOTERM_BP_FAT         | GO:0032318-regulation of Ras GTPase activity                       | 3     | 1.23 | 0.292952292 | Q3UHD9, Q7SIG6, Q9QWY8                                                                                                 |
| cytoskeleton  | UP_SEQ_FEATURE        | repeat:ANK 4                                                       | 4     | 1.64 | 0.298978557 | Q810B6, Q6P9K8, Q4ACU6, Q9DBR7                                                                                         |
| ?             | GOTERM_MF_FAT         | GO:0005085-guanyl-nucleotide exchange factor activity              | 4     | 1.64 | 0.305755858 | Q6PAR5, Q5DU25, Q8R4H2, Q3TES0                                                                                         |
| cytoskeleton  | UP_SEQ_FEATURE        | repeat:ANK 3                                                       | 4     | 1.64 | 0.434669975 | Q810B6, Q6P9K8, Q4ACU6, Q9DBR7                                                                                         |
|               | Annotation Cluster 21 | Enrichment Score: 1.4753414628725434                               |       |      |             |                                                                                                                        |
|               | Category              | Term                                                               | Count | %    | PValue      | Genes                                                                                                                  |
| protein modif | GOTERM_BP_FAT         | GO:0006457-protein folding                                         | 7     | 2.87 | 0.0074196   | P48722, Q9Z2I2, Q62446, Q8BGQ7, Q9ERU9, Q61699, Q9D832                                                                 |
| protein modif | GOTERM_MF_FAT         | GO:0016859-cis-trans isomerase activity                            | 4     | 1.64 | 0.012564676 | Q9Z2I2, Q9WVVL0, Q62446, Q9ERU9                                                                                        |
| protein modif | SP_PIR_KEYWORDS       | Isomerase                                                          | 5     | 2.05 | 0.075870622 | Q9Z2I2, Q9WVVL0, P06745, Q62446, Q9ERU9                                                                                |
| protein modif | SP_PIR_KEYWORDS       | Rotamase                                                           | 3     | 1.23 | 0.076788184 | Q9Z2I2, Q62446, Q9ERU9                                                                                                 |
| protein modif | GOTERM_MF_FAT         | GO:0003755-peptidyl-prolyl cis-trans isomerase activity            | 3     | 1.23 | 0.077337984 | Q9Z2I2, Q62446, Q9ERU9                                                                                                 |
|               | Annotation Cluster 22 | Enrichment Score: 1.464689888398678                                |       |      |             |                                                                                                                        |
|               | Category              | Term                                                               | Count | %    | PValue      | Genes                                                                                                                  |
| cytoskeleton  | GOTERM_CC_FAT         | GO:0015630-microtubule cytoskeleton                                | 15    | 6.15 | 0.004331794 | P70336, P28740, Q6A065, P39054, Q80U49, P23116, O08788, P62627, Q6PDI5, P54227, Q9ERD7, Q9QXL2, P27546, Q8BRT1, Q8C1B1 |
| cytoskeleton  | GOTERM_CC_FAT         | GO:0005813-centrosome                                              | 6     | 2.46 | 0.073898982 | P70336, P28740, Q6A065, Q8BRT1, P23116, Q6PDI5                                                                         |

|                                |                 |                                                                                  |       |      |             |                                                                                |
|--------------------------------|-----------------|----------------------------------------------------------------------------------|-------|------|-------------|--------------------------------------------------------------------------------|
| cytoskeleton                   | GOTERM_CC_FAT   | GO:0005815-microtubule organizing center                                         | 6     | 2.46 | 0.126073592 | P70336, P28740, Q6A065, Q8BRT1, P23116, Q6PDI5                                 |
| Annotation Cluster 23 Category |                 | Enrichment Score: 1.4003148956402045 Term                                        | Count | %    | PValue      | Genes                                                                          |
| cytoskeleton                   | GOTERM_BP_FAT   | GO:0051493-regulation of cytoskeleton organization                               | 7     | 2.87 | 0.00218769  | P54227, Q811D0, P70336, Q9CPW4, P63001, P27546, Q8BRT1                         |
| cytoskeleton                   | GOTERM_BP_FAT   | GO:0070507-regulation of microtubule cytoskeleton organization                   | 4     | 1.64 | 0.01238342  | P54227, P70336, P27546, Q8BRT1                                                 |
| cytoskeleton                   | GOTERM_BP_FAT   | GO:0031111-negative regulation of microtubule polymerization or depolymerization | 3     | 1.23 | 0.019123264 | P54227, P27546, Q8BRT1                                                         |
| cytoskeleton                   | GOTERM_BP_FAT   | GO:0032886-regulation of microtubule-based process                               | 4     | 1.64 | 0.022543367 | P54227, P70336, P27546, Q8BRT1                                                 |
| cytoskeleton                   | GOTERM_BP_FAT   | GO:0031110-regulation of microtubule polymerization or depolymerization          | 3     | 1.23 | 0.054246032 | P54227, P27546, Q8BRT1                                                         |
| cytoskeleton                   | GOTERM_BP_FAT   | GO:0051494-negative regulation of cytoskeleton organization                      | 3     | 1.23 | 0.136378358 | P54227, P27546, Q8BRT1                                                         |
| cytoskeleton                   | GOTERM_BP_FAT   | GO:0010639-negative regulation of organelle organization                         | 3     | 1.23 | 0.203277994 | P54227, P27546, Q8BRT1                                                         |
| cytoskeleton                   | GOTERM_BP_FAT   | GO:0051129-negative regulation of cellular component organization                | 3     | 1.23 | 0.357165788 | P54227, P27546, Q8BRT1                                                         |
| Annotation Cluster 24 Category |                 | Enrichment Score: 1.3644929386492004 Term                                        | Count | %    | PValue      | Genes                                                                          |
| metabolism                     | GOTERM_BP_FAT   | GO:0046165-alcohol biosynthetic process                                          | 4     | 1.64 | 0.013344974 | P05201, Q00612, P06745, Q05920                                                 |
| metabolism                     | GOTERM_BP_FAT   | GO:0034637-cellular carbohydrate biosynthetic process                            | 4     | 1.64 | 0.039589674 | P05201, Q00612, P06745, Q05920                                                 |
| metabolism                     | GOTERM_BP_FAT   | GO:0046364-monosaccharide biosynthetic process                                   | 3     | 1.23 | 0.065020526 | Q00612, P06745, Q05920                                                         |
| metabolism                     | GOTERM_BP_FAT   | GO:0016051-carbohydrate biosynthetic process                                     | 4     | 1.64 | 0.101409377 | P05201, Q00612, P06745, Q05920                                                 |
| Annotation Cluster 25 Category |                 | Enrichment Score: 1.3096258709079858 Term                                        | Count | %    | PValue      | Genes                                                                          |
| mitochondria                   | GOTERM_MF_FAT   | GO:0015035-protein disulfide oxidoreductase activity                             | 3     | 1.23 | 0.008772591 | P97493, Q80Y14, Q9QUH0                                                         |
| mitochondria                   | GOTERM_MF_FAT   | GO:0015036-disulfide oxidoreductase activity                                     | 3     | 1.23 | 0.016179908 | P97493, Q80Y14, Q9QUH0                                                         |
| mitochondria                   | INTERPRO        | IPR012335:Thioredoxin fold                                                       | 5     | 2.05 | 0.050276692 | Q8C0L0, Q9WVL0, P97493, Q80Y14, Q9QUH0                                         |
| mitochondria                   | GOTERM_BP_FAT   | GO:0045454-cell redox homeostasis                                                | 4     | 1.64 | 0.05098457  | Q8C0L0, P97493, Q80Y14, Q9QUH0                                                 |
| mitochondria                   | GOTERM_MF_FAT   | GO:0016667-oxidoreductase activity, acting on sulfur group of donors             | 3     | 1.23 | 0.069795314 | P97493, Q80Y14, Q9QUH0                                                         |
| mitochondria                   | SP_PIR_KEYWORDS | Redox-active center                                                              | 3     | 1.23 | 0.09714624  | Q8C0L0, P97493, Q9QUH0                                                         |
| mitochondria                   | GOTERM_MF_FAT   | GO:0009055-electron carrier activity                                             | 5     | 2.05 | 0.275713001 | Q9DCW4, Q9CPW2, P97493, Q80Y14, Q9QUH0                                         |
| Annotation Cluster 26 Category |                 | Enrichment Score: 1.3046333259581324 Term                                        | Count | %    | PValue      | Genes                                                                          |
| UP_SEQ_FEATURE                 |                 | nucleotide phosphate-binding region:GTP                                          | 10    | 4.10 | 0.024247762 | Q3UHD9, Q9ERD7, P08556, Q80ZJ1, P63001, P39054, Q8CHH9, Q8BGR6, P36536, P58281 |
| SP_PIR_KEYWORDS                |                 | gtp-binding                                                                      | 10    | 4.10 | 0.026636756 | Q3UHD9, Q9ERD7, P08556, Q80ZJ1, P63001, P39054, Q8CHH9, Q8BGR6, P36536, P58281 |
| GOTERM_MF_FAT                  |                 | GO:0003924-GTPase activity                                                       | 6     | 2.46 | 0.027079551 | Q3UHD9, Q9ERD7, P08556, P63001, P39054, P58281                                 |
| GOTERM_MF_FAT                  |                 | GO:0005525-GTP binding                                                           | 10    | 4.10 | 0.044775355 | Q3UHD9, Q9ERD7, P08556, Q80ZJ1, P63001, P39054, Q8CHH9, Q8BGR6, P36536, P58281 |
| GOTERM_MF_FAT                  |                 | GO:0019001-guanyl nucleotide binding                                             | 10    | 4.10 | 0.051002365 | Q3UHD9, Q9ERD7, P08556, Q80ZJ1, P63001, P39054, Q8CHH9, Q8BGR6, P36536, P58281 |
| GOTERM_MF_FAT                  |                 | GO:0032561-guanyl ribonucleotide binding                                         | 10    | 4.10 | 0.051002365 | Q3UHD9, Q9ERD7, P08556, Q80ZJ1, P63001, P39054, Q8CHH9, Q8BGR6, P36536, P58281 |
| INTERPRO                       |                 | IPR005225:Small GTP-binding protein                                              | 4     | 1.64 | 0.361870006 | P08556, Q80ZJ1, P63001, P36536                                                 |
| Annotation Cluster 27 Category |                 | Enrichment Score: 1.2293121471156916 Term                                        | Count | %    | PValue      | Genes                                                                          |
| SMART                          |                 | SM00033:CH                                                                       | 4     | 1.64 | 0.029298712 | Q3V0K9, Q3UH68, Q69ZW3, Q5SXY1                                                 |
| INTERPRO                       |                 | IPR001715:Calponin-like actin-binding domain:CH                                  | 4     | 1.64 | 0.059380087 | Q3V0K9, Q3UH68, Q69ZW3, Q5SXY1                                                 |
| UP_SEQ_FEATURE                 |                 | domain:CH                                                                        | 3     | 1.23 | 0.117916398 | Q3UH68, Q69ZW3, Q5SXY1                                                         |
| Annotation Cluster 28          |                 | Enrichment Score: 1.2285525064729441                                             |       |      |             |                                                                                |

| Category                             | Term            | Count                                                                               | %  | PValue | Genes       |                                                                                                                                                                |
|--------------------------------------|-----------------|-------------------------------------------------------------------------------------|----|--------|-------------|----------------------------------------------------------------------------------------------------------------------------------------------------------------|
| protein modif                        | SP_PIR_KEYWORDS | isopeptide bond                                                                     | 9  | 3.69   | 0.034866925 | Q9D5V5, Q80U40, Q60597, Q9CQ69, Q80U49, Q9ERU9, O88712, Q8CDG3, Q9D0R2                                                                                         |
| protein modif                        | SP_PIR_KEYWORDS | ubl conjugation                                                                     | 13 | 5.33   | 0.05237948  | Q60597, Q9CQ69, O08788, Q80U49, O88712, Q8CDG3, Q62277, Q9QYB5, Q9D5V5, Q80U40, Q8BMI3, Q9ERU9, Q9D0R2                                                         |
| protein modif                        | UP_SEQ_FEATURE  | cross-link:Glycyl lysine isopeptide (Lys-Gly) (interchain with G-Cter in ubiquitin) | 6  | 2.46   | 0.112919161 | Q80U40, Q60597, Q9CQ69, Q80U49, Q8CDG3, Q9D0R2                                                                                                                 |
| Annotation Cluster 29                |                 |                                                                                     |    |        |             |                                                                                                                                                                |
| Enrichment Score: 1.1858016170156027 |                 |                                                                                     |    |        |             |                                                                                                                                                                |
| Category                             | Term            | Count                                                                               | %  | PValue | Genes       |                                                                                                                                                                |
| neural disease                       | KEGG_PATHWAY    | mmu05016:Huntington's disease                                                       | 11 | 4.51   | 0.001130808 | Q9CPP6, P97450, Q9Z1B3, O35683, Q3UVX5, P84091, O08585, Q9CQ69, P56382, Q05A62, O08788                                                                         |
| neural disease                       | SP_PIR_KEYWORDS | respiratory chain                                                                   | 5  | 2.05   | 0.009799168 | Q9CPP6, Q9ERS2, O35683, Q9CQ69, P03893                                                                                                                         |
| neural disease                       | GOTERM_CC_FAT   | GO:0070469-respiratory chain                                                        | 5  | 2.05   | 0.012940514 | Q9CPP6, Q9ERS2, O35683, Q9CQ69, P03893                                                                                                                         |
| neural disease                       | KEGG_PATHWAY    | mmu00190:Oxidative phosphorylation                                                  | 6  | 2.46   | 0.073248313 | Q9CPP6, P97450, O35683, Q9CQ69, P56382, P03893                                                                                                                 |
| neural disease                       | KEGG_PATHWAY    | mmu05012:Parkinson's disease                                                        | 6  | 2.46   | 0.079061354 | Q9CPP6, P97450, O35683, Q9CQ69, P56382, P03893                                                                                                                 |
| neural disease                       | GOTERM_BP_FAT   | GO:0006119-oxidative phosphorylation                                                | 3  | 1.23   | 0.174053675 | P97450, P56382, P03893                                                                                                                                         |
| neural disease                       | KEGG_PATHWAY    | mmu05010:Alzheimer's disease                                                        | 6  | 2.46   | 0.204958188 | Q9CPP6, P97450, Q9Z1B3, O35683, Q9CQ69, P56382                                                                                                                 |
| neural disease                       | GOTERM_MF_FAT   | GO:0015078-hydrogen ion transmembrane transporter activity                          | 3  | 1.23   | 0.293877919 | P97450, Q9CQ69, P56382                                                                                                                                         |
| neural disease                       | GOTERM_MF_FAT   | GO:0015077-monovalent inorganic cation transmembrane transporter activity           | 3  | 1.23   | 0.318197917 | P97450, Q9CQ69, P56382                                                                                                                                         |
| neural disease                       | GOTERM_MF_FAT   | GO:0022890-inorganic cation transmembrane transporter activity                      | 3  | 1.23   | 0.500587206 | P97450, Q9CQ69, P56382                                                                                                                                         |
| Annotation Cluster 30                |                 |                                                                                     |    |        |             |                                                                                                                                                                |
| Enrichment Score: 1.1121899823955164 |                 |                                                                                     |    |        |             |                                                                                                                                                                |
| Category                             | Term            | Count                                                                               | %  | PValue | Genes       |                                                                                                                                                                |
| mitochondria                         | GOTERM_CC_FAT   | GO:0005759-mitochondrial matrix                                                     | 9  | 3.69   | 0.002078179 | Q9DCW4, Q9CPW2, P52196, Q60597, Q9CQX8, Q8BIJ6, Q05920, Q9CZU6, Q9D051                                                                                         |
| mitochondria                         | GOTERM_CC_FAT   | GO:0031980-mitochondrial lumen                                                      | 9  | 3.69   | 0.002078179 | Q9DCW4, Q9CPW2, P52196, Q60597, Q9CQX8, Q8BIJ6, Q05920, Q9CZU6, Q9D051                                                                                         |
| mitochondria                         | GOTERM_CC_FAT   | GO:0031974-membrane-enclosed lumen                                                  | 20 | 8.20   | 0.28628442  | Q8CGF7, Q9CPW2, P21619, Q9CQX8, Q60597, Q8BIJ6, Q05920, Q9D051, O88712, Q923D5, P58281, Q9ERS2, Q9DCW4, Q9JKR6, P52196, Q4KMM3, Q8K310, Q8K3H0, Q9CZU6, Q9CXW3 |
| mitochondria                         | GOTERM_CC_FAT   | GO:0070013-intracellular organelle lumen                                            | 18 | 7.38   | 0.418906721 | Q8CGF7, Q9CPW2, P21619, Q9CQX8, Q60597, Q8BIJ6, Q05920, Q9D051, O88712, Q923D5, Q9ERS2, Q9DCW4, Q9JKR6, P52196, Q4KMM3, Q8K310, Q8K3H0, Q9CZU6                 |
| mitochondria                         | GOTERM_CC_FAT   | GO:0043233-organelle lumen                                                          | 18 | 7.38   | 0.423301864 | Q8CGF7, Q9CPW2, P21619, Q9CQX8, Q60597, Q8BIJ6, Q05920, Q9D051, O88712, Q923D5, Q9ERS2, Q9DCW4, Q9JKR6, P52196, Q4KMM3, Q8K310, Q8K3H0, Q9CZU6                 |
| mitochondria                         | GOTERM_CC_FAT   | GO:0031981-nuclear lumen                                                            | 8  | 3.28   | 0.968119809 | Q8CGF7, Q9ERS2, P21619, Q4KMM3, Q8K310, O88712, Q8K3H0, Q923D5                                                                                                 |
| Annotation Cluster 31                |                 |                                                                                     |    |        |             |                                                                                                                                                                |
| Enrichment Score: 1.1079338678590984 |                 |                                                                                     |    |        |             |                                                                                                                                                                |
| Category                             | Term            | Count                                                                               | %  | PValue | Genes       |                                                                                                                                                                |
| cytoskeleton                         | GOTERM_MF_FAT   | GO:0003774-motor activity                                                           | 6  | 2.46   | 0.03578498  | P28740, Q9QXL2, P39054, O08788, P62627, Q9JMH9                                                                                                                 |
| cytoskeleton                         | SP_PIR_KEYWORDS | motor protein                                                                       | 5  | 2.05   | 0.085341726 | P28740, Q9QXL2, P39054, P62627, Q9JMH9                                                                                                                         |
| cytoskeleton                         | GOTERM_BP_FAT   | GO:0007018-microtubule-based movement                                               | 4  | 1.64   | 0.155358919 | P28740, Q9ERD7, Q9QXL2, P62627                                                                                                                                 |
| Annotation Cluster 32                |                 |                                                                                     |    |        |             |                                                                                                                                                                |
| Enrichment Score: 1.096236483192459  |                 |                                                                                     |    |        |             |                                                                                                                                                                |
| Category                             | Term            | Count                                                                               | %  | PValue | Genes       |                                                                                                                                                                |
| cytoskeleton                         | GOTERM_BP_FAT   | GO:0051493-regulation of cytoskeleton organization                                  | 7  | 2.87   | 0.00218769  | P54227, Q811D0, P70336, Q9CPW4, P63001, P27546, Q8BRT1                                                                                                         |
| cytoskeleton                         | GOTERM_BP_FAT   | GO:0032271-regulation of protein polymerization                                     | 4  | 1.64   | 0.041388225 | P54227, Q811D0, Q9CPW4, P63001                                                                                                                                 |
| cytoskeleton                         | GOTERM_BP_FAT   | GO:0043254-regulation of protein complex assembly                                   | 4  | 1.64   | 0.057214447 | P54227, Q811D0, Q9CPW4, P63001                                                                                                                                 |
| cytoskeleton                         | GOTERM_BP_FAT   | GO:0044087-regulation of cellular component biogenesis                              | 4  | 1.64   | 0.118449694 | P54227, Q811D0, Q9CPW4, P63001                                                                                                                                 |
| cytoskeleton                         | GOTERM_BP_FAT   | GO:0030833-regulation of actin filament polymerization                              | 3  | 1.23   | 0.122778952 | Q811D0, Q9CPW4, P63001                                                                                                                                         |
| cytoskeleton                         | GOTERM_BP_FAT   | GO:0008064-regulation of actin polymerization or depolymerization                   | 3  | 1.23   | 0.145621919 | Q811D0, Q9CPW4, P63001                                                                                                                                         |
| cytoskeleton                         | GOTERM_BP_FAT   | GO:0030832-regulation of actin filament length                                      | 3  | 1.23   | 0.150291628 | Q811D0, Q9CPW4, P63001                                                                                                                                         |
| cytoskeleton                         | GOTERM_BP_FAT   | GO:0032535-regulation of cellular component size                                    | 5  | 2.05   | 0.172335004 | Q811D0, Q7TM88, Q9ERS2, Q9CPW4, P63001                                                                                                                         |
| cytoskeleton                         | GOTERM_BP_FAT   | GO:0032956-regulation of actin cytoskeleton organization                            | 3  | 1.23   | 0.193467614 | Q811D0, Q9CPW4, P63001                                                                                                                                         |
| cytoskeleton                         | GOTERM_BP_FAT   | GO:0032970-regulation of actin filament-based process                               | 3  | 1.23   | 0.198365303 | Q811D0, Q9CPW4, P63001                                                                                                                                         |



| Annotation Cluster 33 |                 | Enrichment Score: 1.0181158533217032                      |    |        |             |                                                                                                                |
|-----------------------|-----------------|-----------------------------------------------------------|----|--------|-------------|----------------------------------------------------------------------------------------------------------------|
| Category              | Term            | Count                                                     | %  | PValue | Genes       |                                                                                                                |
| cytoskeleton          | GOTERM_CC_FAT   | GO:0016323-basolateral plasma membrane                    | 7  | 2.87   | 0.014317736 | Q811D0, Q8BIW1, Q8BTY2, Q03173, O70161, Q9EPR4, Q61301                                                         |
| cytoskeleton          | GOTERM_CC_FAT   | GO:0005912-adherens junction                              | 5  | 2.05   | 0.061473422 | Q811D0, Q8BIW1, Q03173, O70161, Q61301                                                                         |
| cytoskeleton          | GOTERM_CC_FAT   | GO:0070161-anchoring junction                             | 5  | 2.05   | 0.094079524 | Q811D0, Q8BIW1, Q03173, O70161, Q61301                                                                         |
| cytoskeleton          | GOTERM_CC_FAT   | GO:0005925-focal adhesion                                 | 3  | 1.23   | 0.189696691 | Q8BIW1, Q03173, O70161                                                                                         |
| cytoskeleton          | GOTERM_CC_FAT   | GO:0005924-cell-substrate adherens junction               | 3  | 1.23   | 0.210109336 | Q8BIW1, Q03173, O70161                                                                                         |
| cytoskeleton          | GOTERM_CC_FAT   | GO:0030055-cell-substrate junction                        | 3  | 1.23   | 0.235908143 | Q8BIW1, Q03173, O70161                                                                                         |
| Annotation Cluster 34 |                 | Enrichment Score: 0.9618049208641112                      |    |        |             |                                                                                                                |
| Category              | Term            | Count                                                     | %  | PValue | Genes       |                                                                                                                |
| signaling             | GOTERM_BP_FAT   | GO:0033674-positive regulation of kinase activity         | 6  | 2.46   | 0.031201134 | Q811D0, Q3UHD9, Q58A65, O88653, P63001, Q9ESW4                                                                 |
| signaling             | GOTERM_BP_FAT   | GO:0051347-positive regulation of transferase activity    | 6  | 2.46   | 0.035849111 | Q811D0, Q3UHD9, Q58A65, O88653, P63001, Q9ESW4                                                                 |
| signaling             | GOTERM_MF_FAT   | GO:0019901-protein kinase binding                         | 4  | 1.64   | 0.067041984 | Q811D0, Q3UHD9, Q58A65, Q8QZZ7                                                                                 |
| signaling             | GOTERM_BP_FAT   | GO:0045860-positive regulation of protein kinase activity | 5  | 2.05   | 0.086534886 | Q811D0, Q3UHD9, Q58A65, O88653, Q9ESW4                                                                         |
| signaling             | GOTERM_BP_FAT   | GO:0042325-regulation of phosphorylation                  | 8  | 3.28   | 0.096279726 | Q811D0, Q3UHD9, Q58A65, P12367, O88653, P63001, Q9ESW4, P61148                                                 |
| signaling             | GOTERM_MF_FAT   | GO:0019900-kinase binding                                 | 4  | 1.64   | 0.101739823 | Q811D0, Q3UHD9, Q58A65, Q8QZZ7                                                                                 |
| signaling             | GOTERM_BP_FAT   | GO:0019220-regulation of phosphate metabolic process      | 8  | 3.28   | 0.112737877 | Q811D0, Q3UHD9, Q58A65, P12367, O88653, P63001, Q9ESW4, P61148                                                 |
| signaling             | GOTERM_BP_FAT   | GO:0051174-regulation of phosphorus metabolic process     | 8  | 3.28   | 0.112737877 | Q811D0, Q3UHD9, Q58A65, P12367, O88653, P63001, Q9ESW4, P61148                                                 |
| signaling             | GOTERM_BP_FAT   | GO:0043549-regulation of kinase activity                  | 6  | 2.46   | 0.117675876 | Q811D0, Q3UHD9, Q58A65, O88653, P63001, Q9ESW4                                                                 |
| signaling             | GOTERM_BP_FAT   | GO:0051338-regulation of transferase activity             | 6  | 2.46   | 0.132485503 | Q811D0, Q3UHD9, Q58A65, O88653, P63001, Q9ESW4                                                                 |
| signaling             | GOTERM_BP_FAT   | GO:0043085-positive regulation of catalytic activity      | 7  | 2.87   | 0.141186377 | Q791T5, Q811D0, Q3UHD9, Q58A65, O88653, P63001, Q9ESW4                                                         |
| signaling             | GOTERM_BP_FAT   | GO:0032147-activation of protein kinase activity          | 3  | 1.23   | 0.150291628 | Q811D0, O88653, Q9ESW4                                                                                         |
| signaling             | GOTERM_BP_FAT   | GO:0044093-positive regulation of molecular function      | 7  | 2.87   | 0.231549398 | Q791T5, Q811D0, Q3UHD9, Q58A65, O88653, P63001, Q9ESW4                                                         |
| signaling             | GOTERM_BP_FAT   | GO:0045859-regulation of protein kinase activity          | 5  | 2.05   | 0.241880298 | Q811D0, Q3UHD9, Q58A65, O88653, Q9ESW4                                                                         |
| signaling             | GOTERM_MF_FAT   | GO:0019207-kinase regulator activity                      | 3  | 1.23   | 0.249888499 | Q3UHD9, P12367, O88653                                                                                         |
| Annotation Cluster 35 |                 | Enrichment Score: 0.9421042912410842                      |    |        |             |                                                                                                                |
| Category              | Term            | Count                                                     | %  | PValue | Genes       |                                                                                                                |
| vesicle               | GOTERM_BP_FAT   | GO:0006887-exocytosis                                     | 5  | 2.05   | 0.061305958 | Q9CZD3, Q9QW16, Q9CQW1, P84086, Q9JKD3                                                                         |
| vesicle               | GOTERM_BP_FAT   | GO:0032940-secretion by cell                              | 6  | 2.46   | 0.106687202 | Q9CZD3, Q9QW16, Q9Z212, Q9CQW1, P84086, Q9JKD3                                                                 |
| vesicle               | SP_PIR_KEYWORDS | exocytosis                                                | 3  | 1.23   | 0.146201495 | Q9QW16, P84086, Q9JKD3                                                                                         |
| vesicle               | GOTERM_BP_FAT   | GO:0046903-secretion                                      | 6  | 2.46   | 0.178244449 | Q9CZD3, Q9QW16, Q9Z212, Q9CQW1, P84086, Q9JKD3                                                                 |
| Annotation Cluster 36 |                 | Enrichment Score: 0.9409167298695106                      |    |        |             |                                                                                                                |
| Category              | Term            | Count                                                     | %  | PValue | Genes       |                                                                                                                |
| vesicle               | GOTERM_CC_FAT   | GO:0031982-vesicle                                        | 14 | 5.74   | 0.030518847 | P97441, Q07076, P84091, O08585, Q9CQW1, P63001, Q9JKD3, Q9CR95, Q9CZD3, Q62277, P17047, Q3UPL0, Q8BHN3, P19096 |
| vesicle               | GOTERM_CC_FAT   | GO:0031410-cytoplasmic vesicle                            | 13 | 5.33   | 0.053337412 | P97441, P84091, O08585, Q9CQW1, P63001, Q9JKD3, Q9CR95, Q9CZD3, Q62277, P17047, Q3UPL0, Q8BHN3, P19096         |
| vesicle               | GOTERM_CC_FAT   | GO:0030665-clathrin coated vesicle membrane               | 3  | 1.23   | 0.090069153 | Q62277, O08585, Q9CR95                                                                                         |
| vesicle               | SP_PIR_KEYWORDS | cytoplasmic vesicle                                       | 7  | 2.87   | 0.095042972 | Q62277, P97441, Q3UPL0, O08585, Q9CQW1, Q9JKD3, Q9CR95                                                         |
| vesicle               | GOTERM_CC_FAT   | GO:0030659-cytoplasmic vesicle membrane                   | 4  | 1.64   | 0.122524208 | Q62277, P17047, O08585, Q9CR95                                                                                 |
| vesicle               | GOTERM_CC_FAT   | GO:0016023-cytoplasmic membrane-bounded vesicle           | 10 | 4.10   | 0.127157002 | Q62277, Q9CZD3, P17047, P84091, O08585, Q8BHN3, P63001, P19096, Q9JKD3, Q9CR95                                 |
| vesicle               | GOTERM_CC_FAT   | GO:0031988-membrane-bounded vesicle                       | 10 | 4.10   | 0.135321607 | Q62277, Q9CZD3, P17047, P84091, O08585, Q8BHN3, P63001, P19096, Q9JKD3, Q9CR95                                 |
| vesicle               | GOTERM_CC_FAT   | GO:0044433-cytoplasmic vesicle part                       | 4  | 1.64   | 0.148023972 | Q62277, P17047, O08585, Q9CR95                                                                                 |
| vesicle               | GOTERM_CC_FAT   | GO:0012506-vesicle membrane                               | 4  | 1.64   | 0.154651167 | Q62277, P17047, O08585, Q9CR95                                                                                 |
| vesicle               | GOTERM_CC_FAT   | GO:0030662-coated vesicle membrane                        | 3  | 1.23   | 0.169585181 | Q62277, O08585, Q9CR95                                                                                         |
| vesicle               | GOTERM_CC_FAT   | GO:0030136-clathrin-coated vesicle                        | 4  | 1.64   | 0.178539069 | Q62277, O08585, Q9JKD3, Q9CR95                                                                                 |
| vesicle               | GOTERM_CC_FAT   | GO:0030135-coated vesicle                                 | 4  | 1.64   | 0.251285452 | Q62277, O08585, Q9JKD3, Q9CR95                                                                                 |

|               |                       |                                                                  |       |      |             |                                                                                                        |  |
|---------------|-----------------------|------------------------------------------------------------------|-------|------|-------------|--------------------------------------------------------------------------------------------------------|--|
| neuron        | Annotation Cluster 37 | Enrichment Score: 0.9375696001381684                             |       |      |             |                                                                                                        |  |
| neuron        | Category              | Term                                                             | Count | %    | PValue      | Genes                                                                                                  |  |
| neuron        | GOTERM_BP_FAT         | GO:0048169-regulation of long-term neuronal synaptic plasticity  | 3     | 1.23 | 0.026542552 | Q62277, P08556, Q3UVX5                                                                                 |  |
| neuron        | GOTERM_BP_FAT         | GO:0048168-regulation of neuronal synaptic plasticity            | 3     | 1.23 | 0.050810278 | Q62277, P08556, Q3UVX5                                                                                 |  |
| neuron        | GOTERM_BP_FAT         | GO:0048167-regulation of synaptic plasticity                     | 3     | 1.23 | 0.136378358 | Q62277, P08556, Q3UVX5                                                                                 |  |
| neuron        | GOTERM_BP_FAT         | GO:0050804-regulation of synaptic transmission                   | 4     | 1.64 | 0.152154949 | Q62277, P08556, Q3UVX5, Q7TSC1                                                                         |  |
| neuron        | GOTERM_BP_FAT         | GO:0051969-regulation of transmission of nerve impulse           | 4     | 1.64 | 0.175008184 | Q62277, P08556, Q3UVX5, Q7TSC1                                                                         |  |
| neuron        | GOTERM_BP_FAT         | GO:0031644-regulation of neurological system process             | 4     | 1.64 | 0.195308575 | Q62277, P08556, Q3UVX5, Q7TSC1                                                                         |  |
| neuron        | GOTERM_BP_FAT         | GO:0044057-regulation of system process                          | 5     | 2.05 | 0.285961349 | Q62277, P08556, Q9Z2I2, Q3UVX5, Q7TSC1                                                                 |  |
|               | Annotation Cluster 38 | Enrichment Score: 0.9229611258296337                             |       |      |             |                                                                                                        |  |
|               | Category              | Term                                                             | Count | %    | PValue      | Genes                                                                                                  |  |
| Transcription | GOTERM_MF_FAT         | GO:0005198-structural molecule activity                          | 13    | 5.33 | 0.016020858 | Q811D0, Q9Z2H5, P21619, O08585, Q9CPR4, P14115, Q61301, P14206, Q9QYB5, Q9ERD7, P02468, Q9D8E6, P58059 |  |
| Transcription | SP_PIR_KEYWORDS       | ribonucleoprotein                                                | 8     | 3.28 | 0.069622144 | Q99020, Q9CPR4, Q9CQX8, P14115, Q9D8E6, P14206, P58059, Q60668                                         |  |
| Transcription | SP_PIR_KEYWORDS       | ribosomal protein                                                | 6     | 2.46 | 0.092157929 | Q9CPR4, Q9CQX8, P14115, Q9D8E6, P14206, P58059                                                         |  |
| Transcription | GOTERM_CC_FAT         | GO:0005840-ribosome                                              | 6     | 2.46 | 0.132111221 | Q9CPR4, Q9CQX8, P14115, Q9D8E6, P14206, P58059                                                         |  |
| Transcription | GOTERM_MF_FAT         | GO:0003735-structural constituent of ribosome                    | 5     | 2.05 | 0.13856844  | Q9CPR4, P14115, Q9D8E6, P14206, P58059                                                                 |  |
| Transcription | KEGG_PATHWAY          | mmu03010:Ribosome                                                | 4     | 1.64 | 0.198119842 | Q9CPR4, P14115, Q9D8E6, P14206                                                                         |  |
| Transcription | GOTERM_CC_FAT         | GO:0033279-ribosomal subunit                                     | 3     | 1.23 | 0.235908143 | Q9CPR4, Q9CQX8, P14206                                                                                 |  |
| Transcription | GOTERM_CC_FAT         | GO:0030529-ribonucleoprotein complex                             | 8     | 3.28 | 0.469970051 | Q99020, Q9CPR4, Q9CQX8, P14115, Q9D8E6, P14206, P58059, Q60668                                         |  |
|               | Annotation Cluster 39 | Enrichment Score: 0.8438373029560156                             |       |      |             |                                                                                                        |  |
|               | Category              | Term                                                             | Count | %    | PValue      | Genes                                                                                                  |  |
| neuron        | GOTERM_CC_FAT         | GO:0030027-lamellipodium                                         | 5     | 2.05 | 0.011631897 | Q7TMB8, Q9CPW4, P63001, Q03173, Q61301                                                                 |  |
| neuron        | GOTERM_CC_FAT         | GO:0031252-cell leading edge                                     | 6     | 2.46 | 0.020481963 | Q7TMB8, Q9CPW4, P63001, O08788, Q03173, Q61301                                                         |  |
| cytoskeleton  | GOTERM_CC_FAT         | GO:0005912-adherens junction                                     | 5     | 2.05 | 0.061473422 | Q811D0, Q8BIW1, Q03173, O70161, Q61301                                                                 |  |
| neuron        | GOTERM_BP_FAT         | GO:0000904-cell morphogenesis involved in differentiation        | 7     | 2.87 | 0.067194923 | P54227, Q7TMB8, Q99020, P63001, Q03173, O70161, Q61301                                                 |  |
| neuron        | GOTERM_BP_FAT         | GO:0007409-axonogenesis                                          | 6     | 2.46 | 0.069490404 | P54227, Q7TMB8, P63001, Q03173, O70161, Q61301                                                         |  |
| neuron        | GOTERM_BP_FAT         | GO:0048812-neuron projection morphogenesis                       | 6     | 2.46 | 0.089442805 | P54227, Q7TMB8, P63001, Q03173, O70161, Q61301                                                         |  |
| cytoskeleton  | GOTERM_CC_FAT         | GO:0070161-anchoring junction                                    | 5     | 2.05 | 0.094079524 | Q811D0, Q8BIW1, Q03173, O70161, Q61301                                                                 |  |
| neuron        | GOTERM_BP_FAT         | GO:0048667-cell morphogenesis involved in neuron differentiation | 6     | 2.46 | 0.099647063 | P54227, Q7TMB8, P63001, Q03173, O70161, Q61301                                                         |  |
| neuron        | GOTERM_CC_FAT         | GO:0042995-cell projection                                       | 13    | 5.33 | 0.108716678 | Q811D0, Q9CPW4, P63001, Q8BTY2, Q61330, Q03173, Q61301, P58281, Q7TMB8, Q9ERD7, Q60865, P63080, P84086 |  |
| neuron        | GOTERM_BP_FAT         | GO:0000902-cell morphogenesis                                    | 8     | 3.28 | 0.121343886 | P54227, Q7TMB8, Q99020, P63001, Q8BRT1, Q03173, O70161, Q61301                                         |  |
| neuron        | SP_PIR_KEYWORDS       | cell projection                                                  | 6     | 2.46 | 0.126661011 | Q7TMB8, Q9CPW4, Q60865, Q8BTY2, Q03173, Q61301                                                         |  |
| neuron        | GOTERM_BP_FAT         | GO:0048858-cell projection morphogenesis                         | 6     | 2.46 | 0.137344715 | P54227, Q7TMB8, P63001, Q03173, O70161, Q61301                                                         |  |
| neuron        | GOTERM_BP_FAT         | GO:0032990-cell part morphogenesis                               | 6     | 2.46 | 0.158374963 | P54227, Q7TMB8, P63001, Q03173, O70161, Q61301                                                         |  |
| neuron        | GOTERM_BP_FAT         | GO:0031175-neuron projection development                         | 6     | 2.46 | 0.171461221 | P54227, Q7TMB8, P63001, Q03173, O70161, Q61301                                                         |  |
| neuron        | GOTERM_BP_FAT         | GO:0032989-cellular component morphogenesis                      | 8     | 3.28 | 0.195585382 | P54227, Q7TMB8, Q99020, P63001, Q8BRT1, Q03173, O70161, Q61301                                         |  |
| neuron        | SP_PIR_KEYWORDS       | neurogenesis                                                     | 4     | 1.64 | 0.307920296 | P54227, Q7TMB8, P28740, Q03173                                                                         |  |
| cytoskeleton  | GOTERM_CC_FAT         | GO:0015629-actin cytoskeleton                                    | 5     | 2.05 | 0.321046463 | Q9QW16, Q9CPW4, Q03173, Q61301, Q9JMH9                                                                 |  |
| neuron        | GOTERM_BP_FAT         | GO:0048666-neuron development                                    | 6     | 2.46 | 0.356676374 | P54227, Q7TMB8, P63001, Q03173, O70161, Q61301                                                         |  |
| neuron        | GOTERM_BP_FAT         | GO:0030030-cell projection organization                          | 6     | 2.46 | 0.429891387 | P54227, Q7TMB8, P63001, Q03173, O70161, Q61301                                                         |  |
| neuron        | GOTERM_BP_FAT         | GO:0030182-neuron differentiation                                | 7     | 2.87 | 0.450676172 | P54227, Q7TMB8, Q9ERD7, P63001, Q03173, O70161, Q61301                                                 |  |
| neuron        | SP_PIR_KEYWORDS       | differentiation                                                  | 7     | 2.87 | 0.591024754 | P54227, Q7TMB8, P28740, O88712, Q03173, Q61301, P61148                                                 |  |
| neuron        | SP_PIR_KEYWORDS       | developmental protein                                            | 7     | 2.87 | 0.966131272 | P54227, Q7TMB8, P28740, Q03173, Q61301, P61148, Q7TQ95                                                 |  |
|               | Annotation Cluster 40 | Enrichment Score: 0.8407151501893866                             |       |      |             |                                                                                                        |  |
|               | Category              | Term                                                             | Count | %    | PValue      | Genes                                                                                                  |  |
| Transcription | PIRSUPERFAMILY        | PIRSF002072:helix-destabilizing protein                          | 3     | 1.23 | 0.007613879 | Q99020, Q9Z130, Q60668                                                                                 |  |
| Transcription | SMART                 | SM00360:RRM                                                      | 6     | 2.46 | 0.057966459 | Q9D8T7, Q99020, Q8K310, Q9Z130, P59708, Q60668                                                         |  |

|                    |                       |                                                                 |       |      |             |                                                                                |
|--------------------|-----------------------|-----------------------------------------------------------------|-------|------|-------------|--------------------------------------------------------------------------------|
| Transcription      | INTERPRO              | IPR000504:RNA recognition motif, RNP-1                          | 6     | 2.46 | 0.145032146 | Q9D8T7, Q99020, Q8K310, Q9Z130, P59708, Q60668                                 |
| Transcription      | INTERPRO              | IPR012677:Nucleotide-binding, alpha-beta plait                  | 6     | 2.46 | 0.147034531 | Q9D8T7, Q99020, Q8K310, Q9Z130, P59708, Q60668                                 |
| Transcription      | UP_SEQ_FEATURE        | domain:RRM 2                                                    | 4     | 1.64 | 0.149319143 | Q99020, Q8K310, Q9Z130, Q60668                                                 |
| Transcription      | UP_SEQ_FEATURE        | domain:RRM 1                                                    | 4     | 1.64 | 0.149319143 | Q99020, Q8K310, Q9Z130, Q60668                                                 |
| Transcription      | SP_PIR_KEYWORDS       | rna-binding                                                     | 9     | 3.69 | 0.333144059 | Q9D8T7, Q99020, P28271, Q3U0V1, Q8K310, Q9Z130, Q8BGQ7, P59708, Q60668         |
| Transcription      | GOTERM_BP_FAT         | GO:0016071-mRNA metabolic process                               | 5     | 2.05 | 0.583241476 | Q3U0V1, Q9Z130, Q9Z3D5, P59708, Q60668                                         |
| Transcription      | GOTERM_MF_FAT         | GO:0003723-RNA binding                                          | 9     | 3.69 | 0.665557928 | Q9DB27, Q9D8T7, Q99020, P28271, Q3U0V1, Q8K310, Q9Z130, P59708, Q60668         |
|                    | Annotation Cluster 41 | Enrichment Score: 0.819735596539                                |       |      |             |                                                                                |
|                    | Category              | Term                                                            | Count | %    | PValue      | Genes                                                                          |
| nucleus            | GOTERM_CC_FAT         | GO:0005635-nuclear envelope                                     | 6     | 2.46 | 0.063832326 | Q07076, P21619, Q91YE6, Q8BKCS, Q9ERU9, Q9CXW3                                 |
| nucleus            | GOTERM_CC_FAT         | GO:0005643-nuclear pore                                         | 3     | 1.23 | 0.199871394 | Q91YE6, Q8BKCS, Q9ERU9                                                         |
| nucleus            | GOTERM_CC_FAT         | GO:0046930-pore complex                                         | 3     | 1.23 | 0.27227132  | Q91YE6, Q8BKCS, Q9ERU9                                                         |
|                    | Annotation Cluster 42 | Enrichment Score: 0.7439171422679404                            |       |      |             |                                                                                |
|                    | Category              | Term                                                            | Count | %    | PValue      | Genes                                                                          |
|                    | GOTERM_BP_FAT         | GO:0043933-macromolecular complex subunit organization          | 10    | 4.10 | 0.060495238 | P54227, Q58A65, Q9ERD7, P10922, P61458, P02468, Q91YE6, Q8BKCS, P23116, Q03173 |
|                    | GOTERM_BP_FAT         | GO:0034621-cellular macromolecular complex subunit organization | 7     | 2.87 | 0.11385891  | P54227, Q9ERD7, P10922, Q91YE6, Q8BKCS, P23116, Q03173                         |
|                    | GOTERM_BP_FAT         | GO:0065003-macromolecular complex assembly                      | 8     | 3.28 | 0.171989608 | Q58A65, Q9ERD7, P10922, P61458, P02468, Q91YE6, Q8BKCS, P23116                 |
|                    | GOTERM_BP_FAT         | GO:0006461-protein complex assembly                             | 6     | 2.46 | 0.190943405 | Q58A65, Q9ERD7, P61458, P02468, Q91YE6, Q8BKCS                                 |
|                    | GOTERM_BP_FAT         | GO:0070271-protein complex biogenesis                           | 6     | 2.46 | 0.190943405 | Q58A65, Q9ERD7, P61458, P02468, Q91YE6, Q8BKCS                                 |
|                    | GOTERM_BP_FAT         | GO:0034622-cellular macromolecular complex assembly             | 5     | 2.05 | 0.335152986 | Q9ERD7, P10922, Q91YE6, Q8BKCS, P23116                                         |
|                    | GOTERM_BP_FAT         | GO:0043623-cellular protein complex assembly                    | 3     | 1.23 | 0.428486525 | Q9ERD7, Q91YE6, Q8BKCS                                                         |
| neuron             | Annotation Cluster 43 | Enrichment Score: 0.7021491323380084                            |       |      |             |                                                                                |
| neuron             | Category              | Term                                                            | Count | %    | PValue      | Genes                                                                          |
| neuron             | KEGG_PATHWAY          | mmu04720:Long-term potentiation                                 | 4     | 1.64 | 0.119591213 | Q9Z1B3, P08556, Q3UVX5, Q9DBR7                                                 |
| neuron             | KEGG_PATHWAY          | mmu04540:Gap junction                                           | 4     | 1.64 | 0.184942067 | Q9Z1B3, Q9ERD7, P08556, Q3UVX5                                                 |
| neuron             | KEGG_PATHWAY          | mmu04730:Long-term depression                                   | 3     | 1.23 | 0.353848716 | Q9Z1B3, P08556, Q3UVX5                                                         |
|                    | Annotation Cluster 44 | Enrichment Score: 0.6758294605578368                            |       |      |             |                                                                                |
|                    | Category              | Term                                                            | Count | %    | PValue      | Genes                                                                          |
| transport          | GOTERM_BP_FAT         | GO:0046942-carboxylic acid transport                            | 4     | 1.64 | 0.148972588 | Q8R5J9, Q9EPR4, Q8BH59, Q9DCP2                                                 |
| transport          | GOTERM_BP_FAT         | GO:0015849-organic acid transport                               | 4     | 1.64 | 0.152154949 | Q8R5J9, Q9EPR4, Q8BH59, Q9DCP2                                                 |
| transport          | GOTERM_BP_FAT         | GO:0006865-amino acid transport                                 | 3     | 1.23 | 0.247965666 | Q8R5J9, Q8BH59, Q9DCP2                                                         |
| transport          | GOTERM_BP_FAT         | GO:0015837-amine transport                                      | 3     | 1.23 | 0.352288261 | Q8R5J9, Q8BH59, Q9DCP2                                                         |
|                    | Annotation Cluster 45 | Enrichment Score: 0.6620334661135747                            |       |      |             |                                                                                |
|                    | Category              | Term                                                            | Count | %    | PValue      | Genes                                                                          |
|                    | UP_SEQ_FEATURE        | repeat:2                                                        | 6     | 2.46 | 0.08015986  | Q07076, P19246, Q3U0V1, P23116, Q9ERU9, Q03173                                 |
|                    | UP_SEQ_FEATURE        | repeat:1                                                        | 5     | 2.05 | 0.1876468   | Q07076, P19246, Q3U0V1, Q9ERU9, Q03173                                         |
|                    | UP_SEQ_FEATURE        | repeat:4                                                        | 4     | 1.64 | 0.197901429 | P19246, Q3U0V1, P23116, Q03173                                                 |
|                    | UP_SEQ_FEATURE        | repeat:3                                                        | 4     | 1.64 | 0.270083256 | Q07076, P19246, Q3U0V1, Q03173                                                 |
|                    | UP_SEQ_FEATURE        | repeat:7                                                        | 3     | 1.23 | 0.270250117 | P19246, P23116, Q03173                                                         |
|                    | UP_SEQ_FEATURE        | repeat:6                                                        | 3     | 1.23 | 0.292763832 | P19246, P23116, Q03173                                                         |
|                    | UP_SEQ_FEATURE        | repeat:5                                                        | 3     | 1.23 | 0.364953657 | P19246, P23116, Q03173                                                         |
|                    | Annotation Cluster 46 | Enrichment Score: 0.6087089968661792                            |       |      |             |                                                                                |
|                    | Category              | Term                                                            | Count | %    | PValue      | Genes                                                                          |
| ion                | UP_SEQ_FEATURE        | domain:IQ                                                       | 3     | 1.23 | 0.191926871 | Q5DU25, Q9JMH9, Q3TESO                                                         |
| transport/channels |                       |                                                                 |       |      |             |                                                                                |
| ion                | SMART                 | SM00015:IQ                                                      | 3     | 1.23 | 0.229638579 | Q5DU25, Q9JMH9, Q3TESO                                                         |
| transport/channels |                       |                                                                 |       |      |             |                                                                                |

|                        |                       |                                                                |       |      |             |                                                                                                                |
|------------------------|-----------------------|----------------------------------------------------------------|-------|------|-------------|----------------------------------------------------------------------------------------------------------------|
| ion transport/channels | INTERPRO              | IPR000048:IQ calmodulin-binding region                         | 3     | 1.23 | 0.338604227 | Q5DU25, Q9JMH9, Q3TES0                                                                                         |
| neuron                 | Annotation Cluster 47 | Enrichment Score: 0.5986232641183005                           |       |      |             |                                                                                                                |
| neuron                 | Category              | Term                                                           | Count | %    | PValue      | Genes                                                                                                          |
| neuron                 | GOTERM_BP_FAT         | GO:0007267-cell-cell signaling                                 | 8     | 3.28 | 0.096279726 | Q62277, Q9Z212, Q6PFD5, P63080, Q9JJK7, Q8BWF0, Q61301, P61148                                                 |
| neuron                 | GOTERM_BP_FAT         | GO:0019226-transmission of nerve impulse                       | 6     | 2.46 | 0.191296233 | Q62277, Q9Z212, P63080, Q9JJK7, Q8BWF0, Q61301                                                                 |
| neuron                 | GOTERM_BP_FAT         | GO:0007268-synaptic transmission                               | 5     | 2.05 | 0.218949392 | Q62277, P63080, Q9JJK7, Q8BWF0, Q61301                                                                         |
| neuron                 | GOTERM_BP_FAT         | GO:0050877-neurological system process                         | 10    | 4.10 | 0.999820267 | Q62277, P08556, Q9Z212, Q3UVX5, P63080, Q9JJK7, Q8BWF0, Q8BGQ7, Q61301, P58281                                 |
| transport              | Annotation Cluster 48 | Enrichment Score: 0.5774367792002517                           |       |      |             |                                                                                                                |
| transport              | Category              | Term                                                           | Count | %    | PValue      | Genes                                                                                                          |
| transport              | GOTERM_BP_FAT         | GO:0051223-regulation of protein transport                     | 3     | 1.23 | 0.218093401 | Q6PAR5, Q9JKD3, Q7TSC1                                                                                         |
| transport              | GOTERM_BP_FAT         | GO:0070201-regulation of establishment of protein localization | 3     | 1.23 | 0.24796566  | Q6PAR5, Q9JKD3, Q7TSC1                                                                                         |
| transport              | GOTERM_BP_FAT         | GO:0032880-regulation of protein localization                  | 3     | 1.23 | 0.342496072 | Q6PAR5, Q9JKD3, Q7TSC1                                                                                         |
|                        | Annotation Cluster 49 | Enrichment Score: 0.5666146167329914                           |       |      |             |                                                                                                                |
|                        | Category              | Term                                                           | Count | %    | PValue      | Genes                                                                                                          |
|                        | UP_SEQ_FEATURE        | lipid moiety-binding region:S-farnesyl cysteine                | 4     | 1.64 | 0.032431227 | P08556, Q80Z11, P21619, Q9CQW1                                                                                 |
|                        | SP_PIR_KEYWORDS       | prenylation                                                    | 5     | 2.05 | 0.133229126 | P08556, Q80Z11, P21619, Q9CQW1, P63001                                                                         |
|                        | GOTERM_BP_FAT         | GO:0007264-small GTPase mediated signal transduction           | 7     | 2.87 | 0.133680851 | P70336, Q3UHD9, P50396, P08556, Q80Z11, P63001, Q8K2C9                                                         |
|                        | SP_PIR_KEYWORDS       | methylation                                                    | 6     | 2.46 | 0.179680807 | Q99020, P08556, Q80Z11, P63001, Q9Z130, Q60668                                                                 |
|                        | INTERPRO              | IPR005225:Small GTP-binding protein                            | 4     | 1.64 | 0.361870006 | P08556, Q80Z11, P63001, P36536                                                                                 |
|                        | UP_SEQ_FEATURE        | short sequence motif:Effector region                           | 3     | 1.23 | 0.408009168 | P08556, Q80Z11, P63001                                                                                         |
|                        | INTERPRO              | IPR013753:Ras                                                  | 3     | 1.23 | 0.470579359 | P08556, Q80Z11, P63001                                                                                         |
|                        | INTERPRO              | IPR001806:Ras GTPase                                           | 3     | 1.23 | 0.508319263 | P08556, Q80Z11, P63001                                                                                         |
|                        | UP_SEQ_FEATURE        | propeptide:Removed in mature form                              | 4     | 1.64 | 0.651767096 | P08556, Q80Z11, P63001, Q61330                                                                                 |
|                        | SP_PIR_KEYWORDS       | lipoprotein                                                    | 6     | 2.46 | 0.902892395 | P08556, Q80Z11, P21619, Q9CQW1, P63001, Q61330                                                                 |
|                        | Annotation Cluster 50 | Enrichment Score: 0.5547713779771216                           |       |      |             |                                                                                                                |
| ion transport/channels | Category              | Term                                                           | Count | %    | PValue      | Genes                                                                                                          |
| ion transport/channels | GOTERM_MF_FAT         | GO:0031402-sodium ion binding                                  | 4     | 1.64 | 0.154459762 | Q8JZR6, Q8BTY2, Q9EPR4, Q9DCP2                                                                                 |
| ion transport/channels | SP_PIR_KEYWORDS       | Sodium                                                         | 4     | 1.64 | 0.162729435 | Q8JZR6, Q8BTY2, Q9EPR4, Q9DCP2                                                                                 |
| ion transport/channels | GOTERM_MF_FAT         | GO:0015297-antiporter activity                                 | 3     | 1.23 | 0.163444988 | Q8JZR6, Q8BTY2, Q9DCP2                                                                                         |
| ion transport/channels | GOTERM_BP_FAT         | GO:0006811-ion transport                                       | 14    | 5.74 | 0.164059503 | Q8JZR6, P97441, P97450, Q9Z212, P54285, Q8R5J9, Q8BTY2, P56382, Q8BH59, Q9CY27, Q9DCP2, P52196, P63080, Q9EPR4 |
| ion transport/channels | SP_PIR_KEYWORDS       | Sodium transport                                               | 4     | 1.64 | 0.189462324 | Q8JZR6, Q8BTY2, Q9EPR4, Q9DCP2                                                                                 |
| ion transport/channels | GOTERM_BP_FAT         | GO:0006814-sodium ion transport                                | 4     | 1.64 | 0.237441956 | Q8JZR6, Q8BTY2, Q9EPR4, Q9DCP2                                                                                 |
| ion transport/channels | GOTERM_BP_FAT         | GO:0006812-cation transport                                    | 10    | 4.10 | 0.258911708 | Q8JZR6, P97441, P97450, Q9Z212, P54285, Q8BTY2, P56382, Q9EPR4, Q9CY27, Q9DCP2                                 |
| ion transport/channels | GOTERM_BP_FAT         | GO:0030001-metal ion transport                                 | 8     | 3.28 | 0.385876431 | Q8JZR6, P97441, Q9Z212, P54285, Q8BTY2, Q9EPR4, Q9CY27, Q9DCP2                                                 |

|                        |                                       |                                                                  |      |             |                                                        |                                                                                                |
|------------------------|---------------------------------------|------------------------------------------------------------------|------|-------------|--------------------------------------------------------|------------------------------------------------------------------------------------------------|
| ion transport/channels | GOTERM_BP_FAT                         | GO:0015672-monovalent inorganic cation transport                 | 6    | 2.46        | 0.387082945                                            | Q8JZR6, P97450, Q8BTY2, P56382, Q9EPR4, Q9DCP2                                                 |
| ion transport/channels | SP_PIR_KEYWORDS                       | Symport                                                          | 3    | 1.23        | 0.434089547                                            | Q8BTY2, Q9EPR4, Q9DCP2                                                                         |
| ion transport/channels | SP_PIR_KEYWORDS                       | ion transport                                                    | 9    | 3.69        | 0.450971887                                            | Q8JZR6, P97441, P97450, P54285, Q8BTY2, P56382, P63080, Q9EPR4, Q9DCP2                         |
| ion transport/channels | GOTERM_MF_FAT                         | GO:0031420-alkali metal ion binding                              | 4    | 1.64        | 0.512980444                                            | Q8JZR6, Q8BTY2, Q9EPR4, Q9DCP2                                                                 |
| ion transport/channels | GOTERM_MF_FAT                         | GO:0015293-symporter activity                                    | 3    | 1.23        | 0.521199156                                            | Q8BTY2, Q9EPR4, Q9DCP2                                                                         |
| Annotation Cluster 51  |                                       | Enrichment Score: 0.554140939431224                              |      |             |                                                        |                                                                                                |
| Category               | Term                                  | Count                                                            | %    | PValue      | Genes                                                  |                                                                                                |
| SMART                  | SM00320:WD40                          | 6                                                                | 2.46 | 0.112098397 | Q3UPL0, Q9QXL2, Q6NVE8, Q9ERG2, P62881, Q8CCN5         |                                                                                                |
| INTERPRO               | IPR019775:WD40 repeat, conserved site | 7                                                                | 2.87 | 0.12297326  | Q3UPL0, Q9QXL2, Q6NVE8, Q9ERG2, P61971, P62881, Q8CCN5 |                                                                                                |
| UP_SEQ_FEATURE         | repeat:WD 6                           | 5                                                                | 2.05 | 0.22894276  | Q3UPL0, Q9QXL2, Q6NVE8, Q9ERG2, P62881                 |                                                                                                |
| INTERPRO               | IPR001680:WD40 repeat                 | 6                                                                | 2.46 | 0.250463581 | Q3UPL0, Q9QXL2, Q6NVE8, Q9ERG2, P62881, Q8CCN5         |                                                                                                |
| UP_SEQ_FEATURE         | repeat:WD 3                           | 6                                                                | 2.46 | 0.271086411 | Q3UPL0, Q9QXL2, Q6NVE8, Q9ERG2, P62881, Q8CCN5         |                                                                                                |
| SP_PIR_KEYWORDS        | wd repeat                             | 6                                                                | 2.46 | 0.279841302 | Q3UPL0, Q9QXL2, Q6NVE8, Q9ERG2, P62881, Q8CCN5         |                                                                                                |
| UP_SEQ_FEATURE         | repeat:WD 1                           | 6                                                                | 2.46 | 0.286039074 | Q3UPL0, Q9QXL2, Q6NVE8, Q9ERG2, P62881, Q8CCN5         |                                                                                                |
| UP_SEQ_FEATURE         | repeat:WD 2                           | 6                                                                | 2.46 | 0.286039074 | Q3UPL0, Q9QXL2, Q6NVE8, Q9ERG2, P62881, Q8CCN5         |                                                                                                |
| UP_SEQ_FEATURE         | repeat:WD 7                           | 4                                                                | 1.64 | 0.290698295 | Q3UPL0, Q9QXL2, Q6NVE8, P62881                         |                                                                                                |
| INTERPRO               | IPR019782:WD40 repeat 2               | 5                                                                | 2.05 | 0.306469422 | Q3UPL0, Q9QXL2, Q6NVE8, Q9ERG2, P62881                 |                                                                                                |
| INTERPRO               | IPR017986:WD40 repeat, region         | 5                                                                | 2.05 | 0.347318194 | Q3UPL0, Q9QXL2, Q6NVE8, Q9ERG2, P62881                 |                                                                                                |
| UP_SEQ_FEATURE         | repeat:WD 5                           | 5                                                                | 2.05 | 0.367987953 | Q3UPL0, Q9QXL2, Q6NVE8, Q9ERG2, P62881                 |                                                                                                |
| INTERPRO               | IPR019781:WD40 repeat, subgroup       | 5                                                                | 2.05 | 0.368595685 | Q3UPL0, Q9QXL2, Q6NVE8, Q9ERG2, P62881                 |                                                                                                |
| UP_SEQ_FEATURE         | repeat:WD 4                           | 5                                                                | 2.05 | 0.418014464 | Q3UPL0, Q9QXL2, Q6NVE8, Q9ERG2, P62881                 |                                                                                                |
| INTERPRO               | IPR015943:WD40/YVTN repeat-like       | 5                                                                | 2.05 | 0.566241516 | Q9QXL2, Q6NVE8, Q9ERG2, Q80UG2, P62881                 |                                                                                                |
| Annotation Cluster 52  |                                       | Enrichment Score: 0.5451744255490383                             |      |             |                                                        |                                                                                                |
| Category               | Term                                  | Count                                                            | %    | PValue      | Genes                                                  |                                                                                                |
| SMART                  | SM00228:PDZ                           | 4                                                                | 1.64 | 0.179080809 | Q811D0, Q8R4H2, Q4ACU6, Q9JMH9                         |                                                                                                |
| INTERPRO               | IPR001478:PDZ/DHR/GLGF                | 4                                                                | 1.64 | 0.304981001 | Q811D0, Q8R4H2, Q4ACU6, Q9JMH9                         |                                                                                                |
| UP_SEQ_FEATURE         | domain:PDZ                            | 3                                                                | 1.23 | 0.423794083 | Q8R4H2, Q4ACU6, Q9JMH9                                 |                                                                                                |
| Annotation Cluster 53  |                                       | Enrichment Score: 0.4980857191174188                             |      |             |                                                        |                                                                                                |
| Category               | Term                                  | Count                                                            | %    | PValue      | Genes                                                  |                                                                                                |
| ion transport/channels | GOTERM_BP_FAT                         | GO:0019725-cellular homeostasis                                  | 9    | 3.69        | 0.092652314                                            | Q811D0, Q07076, Q8C0L0, Q9Z2I2, P28271, P97493, Q80Y14, Q9CY27, Q9QUH0                         |
| ion transport/channels | GOTERM_BP_FAT                         | GO:0042592-homeostatic process                                   | 12   | 4.92        | 0.164999625                                            | Q811D0, P05201, Q07076, Q8C0L0, Q9Z2I2, P28271, P97493, P63001, Q00612, Q80Y14, Q9CY27, Q9QUH0 |
| ion transport/channels | GOTERM_BP_FAT                         | GO:0008283-cell proliferation                                    | 6    | 2.46        | 0.239890612                                            | Q811D0, Q07076, P08556, Q9Z2I2, P63001, Q8K3H0                                                 |
| ion transport/channels | GOTERM_BP_FAT                         | GO:0030005-cellular di-, tri-valent inorganic cation homeostasis | 4    | 1.64        | 0.26999017                                             | Q07076, Q9Z2I2, P28271, Q9CY27                                                                 |
| ion transport/channels | GOTERM_BP_FAT                         | GO:0055066-di-, tri-valent inorganic cation homeostasis          | 4    | 1.64        | 0.314062694                                            | Q07076, Q9Z2I2, P28271, Q9CY27                                                                 |
| ion transport/channels | GOTERM_BP_FAT                         | GO:0030003-cellular cation homeostasis                           | 4    | 1.64        | 0.336096069                                            | Q07076, Q9Z2I2, P28271, Q9CY27                                                                 |
| ion transport/channels | GOTERM_BP_FAT                         | GO:0055080-cation homeostasis                                    | 4    | 1.64        | 0.451925357                                            | Q07076, Q9Z2I2, P28271, Q9CY27                                                                 |

|                                |                 |                                                                                     |   |      |             |                                                        |
|--------------------------------|-----------------|-------------------------------------------------------------------------------------|---|------|-------------|--------------------------------------------------------|
| ion transport/channels         | GOTERM_BP_FAT   | GO:0006873-cellular ion homeostasis                                                 | 5 | 2.05 | 0.468800282 | Q811D0, Q07076, Q9Z2I2, P28271, Q9CY27                 |
| ion transport/channels         | GOTERM_BP_FAT   | GO:0055082-cellular chemical homeostasis                                            | 5 | 2.05 | 0.489181203 | Q811D0, Q07076, Q9Z2I2, P28271, Q9CY27                 |
| ion transport/channels         | GOTERM_BP_FAT   | GO:0048878-chemical homeostasis                                                     | 6 | 2.46 | 0.547915072 | Q811D0, P05201, Q07076, Q9Z2I2, P28271, Q9CY27         |
| ion transport/channels         | GOTERM_BP_FAT   | GO:0050801-ion homeostasis                                                          | 5 | 2.05 | 0.55929288  | Q811D0, Q07076, Q9Z2I2, P28271, Q9CY27                 |
| Annotation Cluster 54 Category |                 | Enrichment Score: 0.38966211157716224                                               |   |      |             |                                                        |
| metabolism                     | GOTERM_BP_FAT   | GO:0006650-glycerophospholipid metabolic process                                    | 3 | 1.23 | 0.332658224 | Q66GT5, Q8BWF0, O70161                                 |
| metabolism                     | GOTERM_BP_FAT   | GO:0006644-phospholipid metabolic process                                           | 4 | 1.64 | 0.37665877  | Q66GT5, Q8BWF0, O70161, Q99L43                         |
| metabolism                     | GOTERM_BP_FAT   | GO:0019637-organophosphate metabolic process                                        | 4 | 1.64 | 0.423339875 | Q66GT5, Q8BWF0, O70161, Q99L43                         |
| metabolism                     | GOTERM_BP_FAT   | GO:0046486-glycerolipid metabolic process                                           | 3 | 1.23 | 0.52085403  | Q66GT5, Q8BWF0, O70161                                 |
| Annotation Cluster 55 Category |                 | Enrichment Score: 0.35476417773487856                                               |   |      |             |                                                        |
| nucleus                        | GOTERM_BP_FAT   | GO:0044271-nitrogen compound biosynthetic process                                   | 7 | 2.87 | 0.222507822 | P97450, P05201, P61458, Q00612, P56382, Q9R1Z7, Q64737 |
| nucleus                        | GOTERM_BP_FAT   | GO:0009165-nucleotide biosynthetic process                                          | 4 | 1.64 | 0.416518023 | P97450, Q00612, P56382, Q64737                         |
| nucleus                        | GOTERM_BP_FAT   | GO:0009152-purine ribonucleotide biosynthetic process                               | 3 | 1.23 | 0.423854353 | P97450, P56382, Q64737                                 |
| nucleus                        | GOTERM_BP_FAT   | GO:0034654-nucleobase, nucleoside, nucleotide and nucleic acid biosynthetic process | 4 | 1.64 | 0.437892582 | P97450, Q00612, P56382, Q64737                         |
| nucleus                        | GOTERM_BP_FAT   | GO:0034404-nucleobase, nucleoside and nucleotide biosynthetic process               | 4 | 1.64 | 0.437892582 | P97450, Q00612, P56382, Q64737                         |
| nucleus                        | GOTERM_BP_FAT   | GO:0009260-ribonucleotide biosynthetic process                                      | 3 | 1.23 | 0.44226486  | P97450, P56382, Q64737                                 |
| nucleus                        | GOTERM_BP_FAT   | GO:0009150-purine ribonucleotide metabolic process                                  | 3 | 1.23 | 0.478090326 | P97450, P56382, Q64737                                 |
| nucleus                        | GOTERM_BP_FAT   | GO:0009259-ribonucleotide metabolic process                                         | 3 | 1.23 | 0.50402803  | P97450, P56382, Q64737                                 |
| nucleus                        | GOTERM_BP_FAT   | GO:0006164-purine nucleotide biosynthetic process                                   | 3 | 1.23 | 0.553350511 | P97450, P56382, Q64737                                 |
| nucleus                        | GOTERM_BP_FAT   | GO:0006163-purine nucleotide metabolic process                                      | 3 | 1.23 | 0.63794013  | P97450, P56382, Q64737                                 |
| Annotation Cluster 56 Category |                 | Enrichment Score: 0.30667996102688244                                               |   |      |             |                                                        |
| extracellular matrix/adhesion  | GOTERM_BP_FAT   | GO:0016477-cell migration                                                           | 6 | 2.46 | 0.222626348 | P02468, Q9JL26, P63001, Q8BRT1, Q61330, Q61301         |
| extracellular matrix/adhesion  | GOTERM_BP_FAT   | GO:0048870-cell motility                                                            | 6 | 2.46 | 0.335509471 | P02468, Q9JL26, P63001, Q8BRT1, Q61330, Q61301         |
| extracellular matrix/adhesion  | GOTERM_BP_FAT   | GO:0051674-localization of cell                                                     | 6 | 2.46 | 0.335509471 | P02468, Q9JL26, P63001, Q8BRT1, Q61330, Q61301         |
| extracellular matrix/adhesion  | GOTERM_BP_FAT   | GO:0006928-cell motion                                                              | 7 | 2.87 | 0.373726588 | P02468, Q9JL26, P63001, Q8BRT1, Q61330, Q03173, Q61301 |
| extracellular matrix/adhesion  | SP_PIR_KEYWORDS | cell adhesion                                                                       | 5 | 2.05 | 0.757632024 | P98203, Q640R3, P02468, Q61330, Q61301                 |
| extracellular matrix/adhesion  | GOTERM_BP_FAT   | GO:0007155-cell adhesion                                                            | 7 | 2.87 | 0.772189749 | Q811D0, P98203, Q640R3, P02468, P63001, Q61330, Q61301 |
| extracellular matrix/adhesion  | GOTERM_BP_FAT   | GO:0022610-biological adhesion                                                      | 7 | 2.87 | 0.77364754  | Q811D0, P98203, Q640R3, P02468, P63001, Q61330, Q61301 |

|                               |                       |                                                                       |       |      |             |                                                                                |
|-------------------------------|-----------------------|-----------------------------------------------------------------------|-------|------|-------------|--------------------------------------------------------------------------------|
| extracellular matrix/adhesion | GOTERM_BP_FAT         | GO:0016337-cell-cell adhesion                                         | 3     | 1.23 | 0.830414034 | Q811D0, P98203, Q61301                                                         |
|                               | Annotation Cluster 57 | Enrichment Score: 0.3057821581573837                                  |       |      |             |                                                                                |
|                               | Category              | Term                                                                  | Count | %    | PValue      | Genes                                                                          |
|                               | GOTERM_CC_FAT         | GO:000267-cell fraction                                               | 10    | 4.10 | 0.456420595 | Q62277, Q7TMB8, P50396, Q07076, Q9CPU4, P08556, P17047, P63001, Q05920, P14206 |
|                               | GOTERM_CC_FAT         | GO:0005626-insoluble fraction                                         | 9     | 3.69 | 0.460738236 | Q62277, Q7TMB8, P50396, Q07076, Q9CPU4, P08556, P17047, P63001, P14206         |
|                               | GOTERM_CC_FAT         | GO:0005624-membrane fraction                                          | 8     | 3.28 | 0.575220079 | Q62277, Q7TMB8, P50396, Q9CPU4, P08556, P17047, P63001, P14206                 |
|                               | Annotation Cluster 58 | Enrichment Score: 0.25685232404041797                                 |       |      |             |                                                                                |
|                               | Category              | Term                                                                  | Count | %    | PValue      | Genes                                                                          |
| immune                        | GOTERM_BP_FAT         | GO:0002443-leukocyte mediated immunity                                | 3     | 1.23 | 0.337582558 | Q811D0, P84086, P98086                                                         |
| immune                        | GOTERM_BP_FAT         | GO:0002252-immune effector process                                    | 3     | 1.23 | 0.508269998 | Q811D0, P84086, P98086                                                         |
| immune                        | GOTERM_BP_FAT         | GO:0006955-immune response                                            | 3     | 1.23 | 0.988481518 | Q811D0, P84086, P98086                                                         |
|                               | Annotation Cluster 59 | Enrichment Score: 0.24551935737046382                                 |       |      |             |                                                                                |
|                               | Category              | Term                                                                  | Count | %    | PValue      | Genes                                                                          |
| development                   | SP_PIR_KEYWORDS       | angiogenesis                                                          | 3     | 1.23 | 0.204006356 | P32921, P06745, P61148                                                         |
| development                   | GOTERM_BP_FAT         | GO:0001525-angiogenesis                                               | 3     | 1.23 | 0.537297072 | P32921, P06745, P61148                                                         |
| development                   | GOTERM_BP_FAT         | GO:0048514-blood vessel morphogenesis                                 | 3     | 1.23 | 0.749562831 | P32921, P06745, P61148                                                         |
| development                   | GOTERM_BP_FAT         | GO:0001568-blood vessel development                                   | 3     | 1.23 | 0.844127186 | P32921, P06745, P61148                                                         |
| development                   | GOTERM_BP_FAT         | GO:0001944-vasculature development                                    | 3     | 1.23 | 0.853746841 | P32921, P06745, P61148                                                         |
|                               | Annotation Cluster 60 | Enrichment Score: 0.23843932597601025                                 |       |      |             |                                                                                |
|                               | Category              | Term                                                                  | Count | %    | PValue      | Genes                                                                          |
| ion transport/channels        | INTERPRO              | IPR011992:EF-Hand type                                                | 5     | 2.05 | 0.343444183 | Q8K394, Q9Z1B3, Q60902, Q3V0K9, Q8BH59                                         |
| ion transport/channels        | SMART                 | SM00054:EFh                                                           | 3     | 1.23 | 0.392416259 | Q60902, Q3V0K9, Q8BH59                                                         |
| ion transport/channels        | INTERPRO              | IPR018247:EF-HAND 1                                                   | 4     | 1.64 | 0.521888042 | P56375, Q60902, Q3V0K9, Q8BH59                                                 |
| ion transport/channels        | INTERPRO              | IPR002048:Calcium-binding EF-hand                                     | 3     | 1.23 | 0.536439301 | Q60902, Q3V0K9, Q8BH59                                                         |
| ion transport/channels        | INTERPRO              | IPR018249:EF-HAND 2                                                   | 3     | 1.23 | 0.751032478 | Q60902, Q3V0K9, Q8BH59                                                         |
| ion transport/channels        | SP_PIR_KEYWORDS       | calcium                                                               | 8     | 3.28 | 0.868315034 | Q62277, Q9Z1B3, Q07076, Q60902, Q3V0K9, O08585, P54285, Q8BH59                 |
| ion transport/channels        | GOTERM_MF_FAT         | GO:0005509-calcium ion binding                                        | 9     | 3.69 | 0.870738179 | Q62277, Q8K394, Q9Z1B3, Q07076, Q60902, Q3V0K9, O08585, P54285, Q8BH59         |
|                               | Annotation Cluster 61 | Enrichment Score: 0.19281743199543191                                 |       |      |             |                                                                                |
|                               | Category              | Term                                                                  | Count | %    | PValue      | Genes                                                                          |
| ubiquitin                     | GOTERM_BP_FAT         | GO:0030163-protein catabolic process                                  | 9     | 3.69 | 0.475557622 | P35123, Q9D5V5, P54775, A2RT62, Q9ERU9, Q8CDG3, Q8BY87, Q9CXW3, Q3U487         |
| ubiquitin                     | SP_PIR_KEYWORDS       | ubl conjugation pathway                                               | 8     | 3.28 | 0.482424322 | P35123, Q9D5V5, A2RT62, Q9ERU9, Q8CDG3, Q8BY87, Q9CXW3, Q3U487                 |
| metabolism                    | SP_PIR_KEYWORDS       | thiol protease                                                        | 3     | 1.23 | 0.487809466 | P35123, Q8CDG3, Q8BY87                                                         |
| ubiquitin                     | GOTERM_BP_FAT         | GO:0043632-modification-dependent macromolecule catabolic process     | 8     | 3.28 | 0.529724435 | P35123, Q9D5V5, A2RT62, Q9ERU9, Q8CDG3, Q8BY87, Q9CXW3, Q3U487                 |
| ubiquitin                     | GOTERM_BP_FAT         | GO:0019941-modification-dependent protein catabolic process           | 8     | 3.28 | 0.529724435 | P35123, Q9D5V5, A2RT62, Q9ERU9, Q8CDG3, Q8BY87, Q9CXW3, Q3U487                 |
| ubiquitin                     | GOTERM_BP_FAT         | GO:0006511-ubiquitin-dependent protein catabolic process              | 3     | 1.23 | 0.569009457 | P35123, Q9D5V5, Q8BY87                                                         |
| metabolism                    | GOTERM_MF_FAT         | GO:0008234-cysteine-type peptidase activity                           | 3     | 1.23 | 0.575833757 | P35123, Q8CDG3, Q8BY87                                                         |
| ubiquitin                     | GOTERM_BP_FAT         | GO:0051603-proteolysis involved in cellular protein catabolic process | 8     | 3.28 | 0.583076419 | P35123, Q9D5V5, A2RT62, Q9ERU9, Q8CDG3, Q8BY87, Q9CXW3, Q3U487                 |

|             |                       |                                                                |       |       |             |                                                                                                                                                                                                                                                                                                                                                                                                                                                                                                                                                                                                                                                                        |
|-------------|-----------------------|----------------------------------------------------------------|-------|-------|-------------|------------------------------------------------------------------------------------------------------------------------------------------------------------------------------------------------------------------------------------------------------------------------------------------------------------------------------------------------------------------------------------------------------------------------------------------------------------------------------------------------------------------------------------------------------------------------------------------------------------------------------------------------------------------------|
| ubiquitin   | GOTERM_BP_FAT         | GO:0044257-cellular protein catabolic process                  | 8     | 3.28  | 0.589047209 | P35123, Q9D5V5, A2RT62, Q9ERU9, Q8CDG3, Q8BY87, Q9CXW3, Q3U487                                                                                                                                                                                                                                                                                                                                                                                                                                                                                                                                                                                                         |
| ubiquitin   | GOTERM_BP_FAT         | GO:0009057-macromolecule catabolic process                     | 9     | 3.69  | 0.660079123 | P35123, Q9D5V5, P54775, A2RT62, Q9ERU9, Q8CDG3, Q8BY87, Q9CXW3, Q3U487                                                                                                                                                                                                                                                                                                                                                                                                                                                                                                                                                                                                 |
| ubiquitin   | GOTERM_BP_FAT         | GO:0044265-cellular macromolecule catabolic process            | 8     | 3.28  | 0.718234516 | P35123, Q9D5V5, A2RT62, Q9ERU9, Q8CDG3, Q8BY87, Q9CXW3, Q3U487                                                                                                                                                                                                                                                                                                                                                                                                                                                                                                                                                                                                         |
| ubiquitin   | GOTERM_BP_FAT         | GO:0006508-proteolysis                                         | 11    | 4.51  | 0.897894059 | P35123, Q8VCT3, Q11011, Q9D5V5, A2RT62, Q9ERU9, Q8CDG3, Q8BY87, P98086, Q9CXW3, Q3U487                                                                                                                                                                                                                                                                                                                                                                                                                                                                                                                                                                                 |
| metabolism  | SP_PIR_KEYWORDS       | Protease                                                       | 5     | 2.05  | 0.91579008  | P35123, Q8VCT3, Q11011, Q8CDG3, Q8BY87                                                                                                                                                                                                                                                                                                                                                                                                                                                                                                                                                                                                                                 |
| metabolism  | GOTERM_MF_FAT         | GO:0070011-peptidase activity, acting on L-amino acid peptides | 5     | 2.05  | 0.960149221 | P35123, Q8VCT3, Q11011, Q8CDG3, Q8BY87                                                                                                                                                                                                                                                                                                                                                                                                                                                                                                                                                                                                                                 |
| metabolism  | GOTERM_MF_FAT         | GO:0008233-peptidase activity                                  | 5     | 2.05  | 0.968816934 | P35123, Q8VCT3, Q11011, Q8CDG3, Q8BY87                                                                                                                                                                                                                                                                                                                                                                                                                                                                                                                                                                                                                                 |
| neuron      | Annotation Cluster 62 | Enrichment Score: 0.18964112086943943                          |       |       |             |                                                                                                                                                                                                                                                                                                                                                                                                                                                                                                                                                                                                                                                                        |
| neuron      | Category              | Term                                                           | Count | %     | PValue      | Genes                                                                                                                                                                                                                                                                                                                                                                                                                                                                                                                                                                                                                                                                  |
| neuron      | GOTERM_BP_FAT         | GO:0007611-learning or memory                                  | 3     | 1.23  | 0.337582558 | P08556, Q3UVX5, Q9JKK7                                                                                                                                                                                                                                                                                                                                                                                                                                                                                                                                                                                                                                                 |
| neuron      | GOTERM_BP_FAT         | GO:0007610-behavior                                            | 5     | 2.05  | 0.799275884 | P08556, Q3UVX5, P63001, Q9JKK7, P62627                                                                                                                                                                                                                                                                                                                                                                                                                                                                                                                                                                                                                                 |
| neuron      | GOTERM_BP_FAT         | GO:0050890-cognition                                           | 4     | 1.64  | 0.999999835 | P08556, Q3UVX5, Q9JKK7, P58281                                                                                                                                                                                                                                                                                                                                                                                                                                                                                                                                                                                                                                         |
|             | Annotation Cluster 63 | Enrichment Score: 0.14960602912802945                          |       |       |             |                                                                                                                                                                                                                                                                                                                                                                                                                                                                                                                                                                                                                                                                        |
|             | Category              | Term                                                           | Count | %     | PValue      | Genes                                                                                                                                                                                                                                                                                                                                                                                                                                                                                                                                                                                                                                                                  |
| development | GOTERM_BP_FAT         | GO:0060562-epithelial tube morphogenesis                       | 3     | 1.23  | 0.44226486  | Q811D0, Q03173, Q4ACU6                                                                                                                                                                                                                                                                                                                                                                                                                                                                                                                                                                                                                                                 |
| development | GOTERM_BP_FAT         | GO:0035239-tube morphogenesis                                  | 3     | 1.23  | 0.673756257 | Q811D0, Q03173, Q4ACU6                                                                                                                                                                                                                                                                                                                                                                                                                                                                                                                                                                                                                                                 |
| development | GOTERM_BP_FAT         | GO:0002009-morphogenesis of an epithelium                      | 3     | 1.23  | 0.679952409 | Q811D0, Q03173, Q4ACU6                                                                                                                                                                                                                                                                                                                                                                                                                                                                                                                                                                                                                                                 |
| development | GOTERM_BP_FAT         | GO:0035295-tube development                                    | 4     | 1.64  | 0.693942686 | Q811D0, Q03173, Q4ACU6, P61148                                                                                                                                                                                                                                                                                                                                                                                                                                                                                                                                                                                                                                         |
| development | GOTERM_BP_FAT         | GO:0048729-tissue morphogenesis                                | 3     | 1.23  | 0.833940271 | Q811D0, Q03173, Q4ACU6                                                                                                                                                                                                                                                                                                                                                                                                                                                                                                                                                                                                                                                 |
| development | GOTERM_BP_FAT         | GO:0048598-embryonic morphogenesis                             | 4     | 1.64  | 0.866002285 | Q811D0, Q03173, Q4ACU6, Q7TQ95                                                                                                                                                                                                                                                                                                                                                                                                                                                                                                                                                                                                                                         |
| development | GOTERM_BP_FAT         | GO:0060429-epithelium development                              | 3     | 1.23  | 0.883316712 | Q811D0, Q03173, Q4ACU6                                                                                                                                                                                                                                                                                                                                                                                                                                                                                                                                                                                                                                                 |
|             | Annotation Cluster 64 | Enrichment Score: 0.12656767506069933                          |       |       |             |                                                                                                                                                                                                                                                                                                                                                                                                                                                                                                                                                                                                                                                                        |
|             | Category              | Term                                                           | Count | %     | PValue      | Genes                                                                                                                                                                                                                                                                                                                                                                                                                                                                                                                                                                                                                                                                  |
|             | SP_PIR_KEYWORDS       | membrane                                                       | 81    | 33.20 | 0.232920648 | P97441, O54774, Q6PAR5, Q64310, P21619, Q9D1C8, Q3UVX5, Q9DB10, Q61330, Q8BY89, Q9CQV7, Q8BH59, Q9CY27, Q99L43, Q9QWY8, Q80ZJ1, P17047, Q7TQ95, Q810B6, P70336, P97450, P84091, Q9CQ85, O08585, Q9CQW1, P63001, Q66GT5, O35609, Q8BTY2, P56382, Q6PFD5, Q8R4H2, Q9JKD3, Q61301, Q4ACU6, Q9DCP2, Q8BI08, Q62277, Q9QYB5, Q9ERS2, P47802, O35683, Q6NVE8, Q9ESW4, Q9CPP6, Q791T5, Q640R3, Q924L1, Q8K2C9, Q9CR95, P14206, Q80TR1, P63080, Q9ERG2, Q68FD9, Q9JKL4, Q8K3H0, O70161, Q9EPR4, Q75IG6, Q8BWQ6, Q8JZR6, Q811D0, Q9D0L7, P08556, Q9CPU4, P39054, Q8R5J9, Q9CQ69, Q80UG2, P61620, P58281, Q5XJV6, Q80U40, Q8C0L0, Q3UPL0, Q60902, Q88653, Q8BMI3, Q69ZW3, P03893 |
|             | UP_SEQ_FEATURE        | transmembrane region                                           | 40    | 16.39 | 0.999893895 | Q791T5, P97441, Q64310, Q640R3, Q924L1, Q3UVX5, Q9DB10, Q8K2C9, Q8BY89, Q9CQV7, Q9CY27, Q99L43, Q8BH59, Q80TR1, P17047, P63080, Q68FD9, Q9EPR4, Q7TQ95, Q8BWQ6, Q8JZR6, Q9D0L7, Q9CPU4, Q9CQ85, Q8R5J9, O35609, Q8BTY2, Q80UG2, Q9JKD3, P61620, Q8BI08, Q9DCP2, P58281, Q62277, Q5XJV6, Q9ERS2, Q8C0L0, P47802, O35683, P03893                                                                                                                                                                                                                                                                                                                                         |
|             | SP_PIR_KEYWORDS       | transmembrane                                                  | 40    | 16.39 | 0.999999373 | Q791T5, P97441, Q64310, Q640R3, Q924L1, Q3UVX5, Q9DB10, Q8K2C9, Q8BY89, Q9CQV7, Q9CY27, Q99L43, Q8BH59, Q80TR1, P17047, P63080, Q68FD9, Q9EPR4, Q7TQ95, Q8BWQ6, Q8JZR6, Q9D0L7, Q9CPU4, Q9CQ85, Q8R5J9, O35609, Q8BTY2, Q80UG2, Q9JKD3, P61620, Q8BI08, Q9DCP2, P58281, Q62277, Q5XJV6, Q9ERS2, Q8C0L0, P47802, O35683, P03893                                                                                                                                                                                                                                                                                                                                         |
|             | GOTERM_CC_FAT         | GO:0016021-integral to membrane                                | 46    | 18.85 | 0.999999986 | Q791T5, P97441, Q64310, Q640R3, Q924L1, Q3UVX5, Q9DB10, Q8BK5, Q8K2C9, Q8BY89, Q9CQV7, Q9CY27, Q99L43, Q8BH59, Q7TSC1, Q80TR1, P17047, P63080, Q68FD9, Q9EPR4, Q7TQ95, Q8BWQ6, Q8JZR6, Q9D0L7, Q9CPU4, P54285, Q9CQ85, Q9CQW1, Q8R5J9, O35609, Q8BTY2, Q91YE6, Q80UG2, Q9JKD3, P61620, Q8BI08, Q9DCP2, P58281, Q62277, Q5XJV6, Q9ERS2, Q8C0L0, P47802, O35683, Q9ERU9, P03893                                                                                                                                                                                                                                                                                          |
|             | GOTERM_CC_FAT         | GO:0031224-intrinsic to membrane                               | 48    | 19.67 | 0.999999992 | Q791T5, P97441, Q64310, Q640R3, Q924L1, Q3UVX5, Q9DB10, Q61330, Q8BK5, Q8K2C9, Q8BY89, Q9CQV7, Q9CY27, Q99L43, Q8BH59, Q7TSC1, Q80TR1, P17047, P63080, Q68FD9, Q9EPR4, Q7TQ95, Q8BWQ6, Q8JZR6, Q9D0L7, P08556, Q9CPU4, P54285, Q9CQ85, Q9CQW1, Q8R5J9, O35609, Q8BTY2, Q91YE6, Q80UG2, Q9JKD3, P61620, Q8BI08, Q9DCP2, P58281, Q62277, Q5XJV6, Q9ERS2, Q8C0L0, P47802, O35683, Q9ERU9, P03893                                                                                                                                                                                                                                                                          |
|             | Annotation Cluster 65 | Enrichment Score: 0.11367067751158477                          |       |       |             |                                                                                                                                                                                                                                                                                                                                                                                                                                                                                                                                                                                                                                                                        |
|             | Category              | Term                                                           | Count | %     | PValue      | Genes                                                                                                                                                                                                                                                                                                                                                                                                                                                                                                                                                                                                                                                                  |
| signaling   | GOTERM_BP_FAT         | GO:0006793-phosphorus metabolic process                        | 14    | 5.74  | 0.383916228 | P70336, P97450, Q3UU96, Q5F2E8, O35609, Q66GT5, P56382, Q9EPW0, Q5XJV6, Q58A65, O88653, Q9ESW4, P03893, Q9DBR7                                                                                                                                                                                                                                                                                                                                                                                                                                                                                                                                                         |
| signaling   | GOTERM_BP_FAT         | GO:0006796-phosphate metabolic process                         | 14    | 5.74  | 0.383916228 | P70336, P97450, Q3UU96, Q5F2E8, O35609, Q66GT5, P56382, Q9EPW0, Q5XJV6, Q58A65, O88653, Q9ESW4, P03893, Q9DBR7                                                                                                                                                                                                                                                                                                                                                                                                                                                                                                                                                         |
| signaling   | GOTERM_BP_FAT         | GO:0016310-phosphorylation                                     | 11    | 4.51  | 0.503040089 | Q5XJV6, P70336, P97450, Q58A65, O88653, Q3UU96, Q5F2E8, O35609, Q9ESW4, P56382, P03893                                                                                                                                                                                                                                                                                                                                                                                                                                                                                                                                                                                 |
| signaling   | SMART                 | SM00220:S_TKc                                                  | 3     | 1.23  | 0.740973629 | P70336, Q3UU96, Q5F2E8                                                                                                                                                                                                                                                                                                                                                                                                                                                                                                                                                                                                                                                 |
| signaling   | GOTERM_MF_FAT         | GO:0004674-protein serine/threonine kinase activity            | 5     | 2.05  | 0.809676528 | Q5XJV6, P70336, Q3UU96, Q5F2E8, O35609                                                                                                                                                                                                                                                                                                                                                                                                                                                                                                                                                                                                                                 |
| signaling   | UP_SEQ_FEATURE        | binding site:ATP                                               | 7     | 2.87  | 0.838653594 | Q5XJV6, P70336, Q3UU96, Q5F2E8, Q8BI08, Q8BU30, Q05920                                                                                                                                                                                                                                                                                                                                                                                                                                                                                                                                                                                                                 |



|                       |                 |                                                         |       |      |             |                                                                |
|-----------------------|-----------------|---------------------------------------------------------|-------|------|-------------|----------------------------------------------------------------|
| signaling             | INTERPRO        | IPR008271:Serine/threonine protein kinase, active site  | 4     | 1.64 | 0.852418921 | P70336, Q3UU96, Q5F2E8, O35609                                 |
| signaling             | INTERPRO        | IPR002290:Serine/threonine protein kinase               | 3     | 1.23 | 0.863688074 | P70336, Q3UU96, Q5F2E8                                         |
| signaling             | GOTERM_BP_FAT   | GO:0006468-protein amino acid phosphorylation           | 7     | 2.87 | 0.867080595 | Q5XJV6, P70336, Q58A65, O88653, Q3UU96, Q5F2E8, O35609         |
| signaling             | INTERPRO        | IPR017442:Serine/threonine protein kinase-related       | 4     | 1.64 | 0.869744676 | P70336, Q3UU96, Q5F2E8, O35609                                 |
| signaling             | UP_SEQ_FEATURE  | active site:Proton acceptor                             | 8     | 3.28 | 0.879539137 | Q5XJV6, P70336, Q3UU96, Q5F2E8, Q00612, Q9R1Z7, Q8BWF0, P05063 |
| signaling             | INTERPRO        | IPR000719:Protein kinase, core                          | 5     | 2.05 | 0.887027402 | Q5XJV6, P70336, Q3UU96, Q5F2E8, O35609                         |
| signaling             | SP_PIR_KEYWORDS | serine/threonine-protein kinase                         | 4     | 1.64 | 0.894163027 | Q5XJV6, P70336, Q3UU96, Q5F2E8                                 |
| signaling             | SP_PIR_KEYWORDS | kinase                                                  | 7     | 2.87 | 0.919240149 | Q5XJV6, P70336, P12367, Q3UU96, Q5F2E8, Q9ESW4, O70161         |
| signaling             | INTERPRO        | IPR017441:Protein kinase, ATP binding site              | 4     | 1.64 | 0.945665686 | Q5XJV6, P70336, Q3UU96, Q5F2E8                                 |
| signaling             | GOTERM_MF_FAT   | GO:0004672-protein kinase activity                      | 5     | 2.05 | 0.952030621 | Q5XJV6, P70336, Q3UU96, Q5F2E8, O35609                         |
| signaling             | UP_SEQ_FEATURE  | domain:Protein kinase                                   | 4     | 1.64 | 0.977098474 | Q5XJV6, P70336, Q3UU96, Q5F2E8                                 |
| Annotation Cluster 66 |                 | Enrichment Score: 0.10924070055997286                   |       |      |             |                                                                |
| Category              |                 | Term                                                    | Count | %    | PValue      | Genes                                                          |
| Transcription         | GOTERM_BP_FAT   | GO:0016071-mRNA metabolic process                       | 5     | 2.05 | 0.583241476 | Q3U0V1, Q923D5, P59708, Q60668                                 |
| Transcription         | SP_PIR_KEYWORDS | mrna splicing                                           | 3     | 1.23 | 0.732123995 | Q3U0V1, Q923D5, P59708                                         |
| Transcription         | GOTERM_BP_FAT   | GO:0008380-RNA splicing                                 | 3     | 1.23 | 0.756983016 | Q3U0V1, Q923D5, P59708                                         |
| Transcription         | SP_PIR_KEYWORDS | mrna processing                                         | 3     | 1.23 | 0.837729576 | Q3U0V1, Q923D5, P59708                                         |
| Transcription         | GOTERM_BP_FAT   | GO:0006397-mRNA processing                              | 3     | 1.23 | 0.87138728  | Q3U0V1, Q923D5, P59708                                         |
| Transcription         | GOTERM_BP_FAT   | GO:0006396-RNA processing                               | 4     | 1.64 | 0.936961087 | Q3U0V1, Q8BGQ7, Q923D5, P59708                                 |
| Annotation Cluster 67 |                 | Enrichment Score: 0.08905784755672848                   |       |      |             |                                                                |
| Category              |                 | Term                                                    | Count | %    | PValue      | Genes                                                          |
| protein modif         | GOTERM_MF_FAT   | GO:0042803-protein homodimerization activity            | 3     | 1.23 | 0.725454755 | Q9D7X8, Q00612, Q9R1Z7                                         |
| protein modif         | GOTERM_MF_FAT   | GO:0046983-protein dimerization activity                | 4     | 1.64 | 0.82939239  | Q9D7X8, Q00612, Q9R1Z7, Q80UJ7                                 |
| protein modif         | GOTERM_MF_FAT   | GO:0042802-identical protein binding                    | 3     | 1.23 | 0.898371735 | Q9D7X8, Q00612, Q9R1Z7                                         |
| Annotation Cluster 68 |                 | Enrichment Score: 0.0849823566502917                    |       |      |             |                                                                |
| Category              |                 | Term                                                    | Count | %    | PValue      | Genes                                                          |
| apoptosis             | GOTERM_BP_FAT   | GO:0043523-regulation of neuron apoptosis               | 3     | 1.23 | 0.292952292 | P08556, Q8BGQ7, Q7TSC1                                         |
| apoptosis             | GOTERM_BP_FAT   | GO:0043065-positive regulation of apoptosis             | 3     | 1.23 | 0.850601711 | Q791T5, Q9ERS2, Q7TSC1                                         |
| apoptosis             | GOTERM_BP_FAT   | GO:0043068-positive regulation of programmed cell death | 3     | 1.23 | 0.853746841 | Q791T5, Q9ERS2, Q7TSC1                                         |
| apoptosis             | GOTERM_BP_FAT   | GO:0010942-positive regulation of cell death            | 3     | 1.23 | 0.85683182  | Q791T5, Q9ERS2, Q7TSC1                                         |
| apoptosis             | GOTERM_BP_FAT   | GO:0006915-apoptosis                                    | 5     | 2.05 | 0.876820806 | Q791T5, Q9ERS2, Q9D7X8, Q7TSC1, P58281                         |
| apoptosis             | GOTERM_BP_FAT   | GO:0012501-programmed cell death                        | 5     | 2.05 | 0.884920111 | Q791T5, Q9ERS2, Q9D7X8, Q7TSC1, P58281                         |
| apoptosis             | GOTERM_BP_FAT   | GO:0008219-cell death                                   | 5     | 2.05 | 0.914403097 | Q791T5, Q9ERS2, Q9D7X8, Q7TSC1, P58281                         |
| apoptosis             | GOTERM_BP_FAT   | GO:0016265-death                                        | 5     | 2.05 | 0.923089674 | Q791T5, Q9ERS2, Q9D7X8, Q7TSC1, P58281                         |
| apoptosis             | GOTERM_BP_FAT   | GO:0042981-regulation of apoptosis                      | 5     | 2.05 | 0.943585611 | Q791T5, Q9ERS2, P08556, Q8BGQ7, Q7TSC1                         |
| apoptosis             | SP_PIR_KEYWORDS | Apoptosis                                               | 3     | 1.23 | 0.944047971 | Q791T5, Q9ERS2, P58281                                         |
| apoptosis             | GOTERM_BP_FAT   | GO:0043067-regulation of programmed cell death          | 5     | 2.05 | 0.947135157 | Q791T5, Q9ERS2, P08556, Q8BGQ7, Q7TSC1                         |
| apoptosis             | GOTERM_BP_FAT   | GO:0010941-regulation of cell death                     | 5     | 2.05 | 0.948593292 | Q791T5, Q9ERS2, P08556, Q8BGQ7, Q7TSC1                         |
| Annotation Cluster 69 |                 | Enrichment Score: 0.07145885996834248                   |       |      |             |                                                                |
| Category              |                 | Term                                                    | Count | %    | PValue      | Genes                                                          |
|                       | SP_PIR_KEYWORDS | repressor                                               | 6     | 2.46 | 0.610600382 | Q8CGF7, Q9D8T7, Q99020, Q91VW0, Q92130, O88712                 |
|                       | GOTERM_MF_FAT   | GO:0003700-transcription factor activity                | 3     | 1.23 | 0.999701445 | Q8CGF7, Q99020, O88712                                         |
|                       | GOTERM_MF_FAT   | GO:0030528-transcription regulator activity             | 4     | 1.64 | 0.999990856 | Q8CGF7, Q99020, P61458, O88712                                 |
| Annotation Cluster 70 |                 | Enrichment Score: 0.06689470027656456                   |       |      |             |                                                                |
| Category              |                 | Term                                                    | Count | %    | PValue      | Genes                                                          |
| cell cycle            | GOTERM_BP_FAT   | GO:0007049-cell cycle                                   | 8     | 3.28 | 0.721401538 | P54227, Q9DB27, Q9ERD7, Q640R3, Q8CHH9, Q8BRT1, Q8K3H0, P84089 |
| cell cycle            | GOTERM_BP_FAT   | GO:0000278-mitotic cell cycle                           | 3     | 1.23 | 0.844127186 | P54227, Q9ERD7, Q8BRT1                                         |
| cell cycle            | GOTERM_BP_FAT   | GO:0000279-M phase                                      | 3     | 1.23 | 0.897640891 | P54227, Q9ERD7, Q8BRT1                                         |
| cell cycle            | GOTERM_BP_FAT   | GO:0022402-cell cycle process                           | 4     | 1.64 | 0.902852894 | P54227, Q9ERD7, Q640R3, Q8BRT1                                 |
| cell cycle            | GOTERM_BP_FAT   | GO:0022403-cell cycle phase                             | 3     | 1.23 | 0.938041223 | P54227, Q9ERD7, Q8BRT1                                         |

| Annotation Cluster 71 |                 | Enrichment Score: 0.04894286341993925  |       |             |                                                                                                                                                                                                                                                                                                                                         |
|-----------------------|-----------------|----------------------------------------|-------|-------------|-----------------------------------------------------------------------------------------------------------------------------------------------------------------------------------------------------------------------------------------------------------------------------------------------------------------------------------------|
| Category              | Term            | Count                                  | %     | PValue      | Genes                                                                                                                                                                                                                                                                                                                                   |
| Transcription         | SP_PIR_KEYWORDS | 6                                      | 2.46  | 0.610600382 | Q8CGF7, Q9D8T7, Q99020, Q91WV0, Q9Z130, O88712                                                                                                                                                                                                                                                                                          |
| Transcription         | GOTERM_MF_FAT   | 9                                      | 3.69  | 0.665557928 | Q9DB27, Q9D8T7, Q99020, P28271, Q3U0V1, Q8K310, Q9Z130, P59708, Q60668                                                                                                                                                                                                                                                                  |
| Transcription         | SP_PIR_KEYWORDS | 10                                     | 4.10  | 0.999228051 | Q9DB27, Q8CGF7, Q9D8T7, Q99020, Q91WV0, Q3U0V1, Q9Z130, O88712, Q64152, Q60668                                                                                                                                                                                                                                                          |
| Transcription         | SP_PIR_KEYWORDS | 7                                      | 2.87  | 0.999904897 | Q99020, P10922, Q91WV0, Q3U0V1, O54962, Q9Z130, Q60668                                                                                                                                                                                                                                                                                  |
| Transcription         | GOTERM_MF_FAT   | 10                                     | 4.10  | 0.999907867 | Q8CGF7, Q99020, P10922, Q91WV0, Q3U0V1, O54962, Q9Z130, Q8VD37, O88712, Q60668                                                                                                                                                                                                                                                          |
| Transcription         | SP_PIR_KEYWORDS | 10                                     | 4.10  | 0.999915688 | Q9DB27, Q8CGF7, Q9D8T7, Q99020, Q91WV0, Q3U0V1, Q9Z130, O88712, Q64152, Q60668                                                                                                                                                                                                                                                          |
| Transcription         | GOTERM_BP_FAT   | 10                                     | 4.10  | 0.999930733 | Q9DB27, Q8CGF7, Q9D8T7, Q99020, Q91WV0, Q3U0V1, Q9Z130, O88712, Q64152, Q60668                                                                                                                                                                                                                                                          |
| Transcription         | GOTERM_BP_FAT   | 12                                     | 4.92  | 0.99999439  | Q9DB27, Q8CGF7, Q9D8T7, Q9ERS2, Q99020, P61458, Q91WV0, Q3U0V1, Q9Z130, O88712, Q64152, Q60668                                                                                                                                                                                                                                          |
| Annotation Cluster 72 |                 | Enrichment Score: 0.013319303816877494 |       |             |                                                                                                                                                                                                                                                                                                                                         |
| Category              | Term            | Count                                  | %     | PValue      | Genes                                                                                                                                                                                                                                                                                                                                   |
|                       | GOTERM_BP_FAT   | 3                                      | 1.23  | 0.922398689 | Q9ERS2, Q99020, O88712                                                                                                                                                                                                                                                                                                                  |
|                       | GOTERM_BP_FAT   | 3                                      | 1.23  | 0.924115634 | Q9ERS2, Q99020, O88712                                                                                                                                                                                                                                                                                                                  |
|                       | GOTERM_BP_FAT   | 3                                      | 1.23  | 0.962613102 | Q9ERS2, Q99020, O88712                                                                                                                                                                                                                                                                                                                  |
|                       | GOTERM_BP_FAT   | 4                                      | 1.64  | 0.968999363 | Q9ERS2, Q99020, Q9D1C8, O88712                                                                                                                                                                                                                                                                                                          |
|                       | GOTERM_BP_FAT   | 3                                      | 1.23  | 0.972092082 | Q9ERS2, Q99020, O88712                                                                                                                                                                                                                                                                                                                  |
|                       | GOTERM_BP_FAT   | 3                                      | 1.23  | 0.973376521 | Q9ERS2, Q99020, O88712                                                                                                                                                                                                                                                                                                                  |
|                       | GOTERM_BP_FAT   | 3                                      | 1.23  | 0.976062163 | Q9ERS2, Q99020, O88712                                                                                                                                                                                                                                                                                                                  |
|                       | GOTERM_BP_FAT   | 3                                      | 1.23  | 0.978229005 | Q9ERS2, Q99020, O88712                                                                                                                                                                                                                                                                                                                  |
|                       | GOTERM_BP_FAT   | 3                                      | 1.23  | 0.981128847 | Q9ERS2, Q99020, O88712                                                                                                                                                                                                                                                                                                                  |
|                       | GOTERM_BP_FAT   | 3                                      | 1.23  | 0.982009843 | Q9ERS2, Q99020, O88712                                                                                                                                                                                                                                                                                                                  |
|                       | GOTERM_BP_FAT   | 4                                      | 1.64  | 0.999999853 | Q9ERS2, Q99020, O88712, Q60668                                                                                                                                                                                                                                                                                                          |
|                       | GOTERM_BP_FAT   | 3                                      | 1.23  | 0.999999983 | Q9ERS2, Q99020, O88712                                                                                                                                                                                                                                                                                                                  |
| Annotation Cluster 73 |                 | Enrichment Score: 0.006724244229075689 |       |             |                                                                                                                                                                                                                                                                                                                                         |
| Category              | Term            | Count                                  | %     | PValue      | Genes                                                                                                                                                                                                                                                                                                                                   |
| nucleus               | GOTERM_CC_FAT   | 8                                      | 3.28  | 0.968119809 | Q8CGF7, Q9ERS2, P21619, Q4KMM3, Q8K310, O88712, Q8K3H0, Q923D5                                                                                                                                                                                                                                                                          |
| nucleus               | GOTERM_CC_FAT   | 4                                      | 1.64  | 0.991343193 | Q9ERS2, O88712, Q8K3H0, Q923D5                                                                                                                                                                                                                                                                                                          |
| nucleus               | GOTERM_CC_FAT   | 3                                      | 1.23  | 0.994658806 | O88712, Q8K3H0, Q923D5                                                                                                                                                                                                                                                                                                                  |
| Annotation Cluster 74 |                 | Enrichment Score: 0.003751763296613519 |       |             |                                                                                                                                                                                                                                                                                                                                         |
| Category              | Term            | Count                                  | %     | PValue      | Genes                                                                                                                                                                                                                                                                                                                                   |
|                       | GOTERM_MF_FAT   | 40                                     | 16.39 | 0.981692563 | P97441, P54071, Q11011, Q8VCT3, Q3UH68, P28271, Q8BIU6, Q9R1Z7, Q91V92, Q8VD37, Q64737, Q9CY27, Q8BH59, Q9QWY8, Q9Z1B3, Q8K310, Q8BU30, Q9EPR4, Q7SIG6, Q9JI46, Q8JZR6, Q810B6, Q8K394, P70336, Q07076, Q9PCPW2, Q8BIW1, Q3V0K9, Q3UU96, P54285, O08585, Q8BTY2, Q05920, Q9DCP2, Q62277, Q3UHD9, Q9QYB5, Q60902, P19096, Q9ERU9         |
|                       | GOTERM_MF_FAT   | 41                                     | 16.80 | 0.981850544 | P97441, P54071, Q11011, Q8VCT3, Q3UH68, P28271, Q8BIU6, Q9R1Z7, Q91V92, Q8VD37, Q64737, Q9CY27, Q8BH59, Q9QWY8, Q9Z1B3, P63080, Q8K310, Q8BU30, Q9EPR4, Q7SIG6, Q9JI46, Q8JZR6, Q810B6, Q8K394, P70336, Q07076, Q9PCPW2, Q8BIW1, Q3V0K9, Q3UU96, P54285, O08585, Q8BTY2, Q05920, Q9DCP2, Q62277, Q3UHD9, Q9QYB5, Q60902, P19096, Q9ERU9 |
|                       | GOTERM_MF_FAT   | 40                                     | 16.39 | 0.984815269 | P97441, P54071, Q11011, Q8VCT3, Q3UH68, P28271, Q8BIU6, Q9R1Z7, Q91V92, Q8VD37, Q64737, Q9CY27, Q8BH59, Q9QWY8, Q9Z1B3, Q8K310, Q8BU30, Q9EPR4, Q7SIG6, Q9JI46, Q8JZR6, Q810B6, Q8K394, P70336, Q07076, Q9PCPW2, Q8BIW1, Q3V0K9, Q3UU96, P54285, O08585, Q8BTY2, Q05920, Q9DCP2, Q62277, Q3UHD9, Q9QYB5, Q60902, P19096, Q9ERU9         |
|                       | GOTERM_MF_FAT   | 24                                     | 9.84  | 0.991002582 | Q810B6, P70336, P97441, P54071, Q8VCT3, Q11011, Q9PCPW2, Q8BIW1, P28271, Q3UU96, Q3UH68, Q9R1Z7, Q8BIU6, Q05920, Q8VD37, Q64737, Q9CY27, Q9QWY8, Q3UHD9, Q8K310, P19096, Q9ERU9, Q8BU30, Q7SIG6                                                                                                                                         |
|                       | GOTERM_MF_FAT   | 17                                     | 6.97  | 0.996645569 | Q810B6, P70336, P97441, Q11011, Q8VCT3, Q3UU96, Q3UH68, Q9R1Z7, Q8BIU6, Q8VD37, Q9QWY8, Q3UHD9, Q8K310, P19096, Q9ERU9, Q8BU30, Q7SIG6                                                                                                                                                                                                  |
|                       | SP_PIR_KEYWORDS | 8                                      | 3.28  | 0.99745826  | Q810B6, P70336, Q3UHD9, Q3UU96, Q8K310, Q9ERU9, Q8VD37, Q9QWY8                                                                                                                                                                                                                                                                          |

|                               |                                         |                                             |       |             |                                                                                                                                                                                                                                                                                                                                                                                                                                                                                                                                                                                                                                                                                                                                                                                                                                                                                                                                                                                                                                                                                                                                                                                                                                                                                                                                                                                                                                                                                                                                                                                                                                                                                                                                                                                                                                                                                                                                                                                                                                                                                                |                                                                                                                                                                        |
|-------------------------------|-----------------------------------------|---------------------------------------------|-------|-------------|------------------------------------------------------------------------------------------------------------------------------------------------------------------------------------------------------------------------------------------------------------------------------------------------------------------------------------------------------------------------------------------------------------------------------------------------------------------------------------------------------------------------------------------------------------------------------------------------------------------------------------------------------------------------------------------------------------------------------------------------------------------------------------------------------------------------------------------------------------------------------------------------------------------------------------------------------------------------------------------------------------------------------------------------------------------------------------------------------------------------------------------------------------------------------------------------------------------------------------------------------------------------------------------------------------------------------------------------------------------------------------------------------------------------------------------------------------------------------------------------------------------------------------------------------------------------------------------------------------------------------------------------------------------------------------------------------------------------------------------------------------------------------------------------------------------------------------------------------------------------------------------------------------------------------------------------------------------------------------------------------------------------------------------------------------------------------------------------|------------------------------------------------------------------------------------------------------------------------------------------------------------------------|
|                               | SP_PIR_KEYWORDS                         | zinc                                        | 14    | 5.74        | 0.998503309                                                                                                                                                                                                                                                                                                                                                                                                                                                                                                                                                                                                                                                                                                                                                                                                                                                                                                                                                                                                                                                                                                                                                                                                                                                                                                                                                                                                                                                                                                                                                                                                                                                                                                                                                                                                                                                                                                                                                                                                                                                                                    | Q810B6, P70336, P97441, Q11011, Q8VCT3, Q3UU96, Q3UH68, Q9R1Z7, Q8VD37, Q9QWY8, Q3UHD9, Q8K310, Q9ERU9, Q7S1G6                                                         |
|                               | SP_PIR_KEYWORDS                         | metal-binding                               | 21    | 8.61        | 0.999425597                                                                                                                                                                                                                                                                                                                                                                                                                                                                                                                                                                                                                                                                                                                                                                                                                                                                                                                                                                                                                                                                                                                                                                                                                                                                                                                                                                                                                                                                                                                                                                                                                                                                                                                                                                                                                                                                                                                                                                                                                                                                                    | Q810B6, P70336, P54071, Q8VCT3, Q11011, Q9CPW2, Q8BIW1, P28271, Q3UU96, Q3UH68, Q9R1Z7, Q91V92, Q05920, Q8VD37, Q64737, Q9QWY8, Q3UHD9, Q8K310, Q9ERU9, Q7S1G6, Q9JI46 |
| extracellular matrix/adhesion | Annotation Cluster 75 Category          | Enrichment Score: 7.09913148354024E-4 Term  | Count | %           | PValue                                                                                                                                                                                                                                                                                                                                                                                                                                                                                                                                                                                                                                                                                                                                                                                                                                                                                                                                                                                                                                                                                                                                                                                                                                                                                                                                                                                                                                                                                                                                                                                                                                                                                                                                                                                                                                                                                                                                                                                                                                                                                         | Genes                                                                                                                                                                  |
|                               | GOTERM_CC_FAT                           | GO:0005615-extracellular space              | 3     | 1.23        | 0.994519213                                                                                                                                                                                                                                                                                                                                                                                                                                                                                                                                                                                                                                                                                                                                                                                                                                                                                                                                                                                                                                                                                                                                                                                                                                                                                                                                                                                                                                                                                                                                                                                                                                                                                                                                                                                                                                                                                                                                                                                                                                                                                    | Q8VCT3, P06745, P61148                                                                                                                                                 |
|                               | GOTERM_CC_FAT                           | GO:0044421-extracellular region part        | 4     | 1.64        | 0.998961401                                                                                                                                                                                                                                                                                                                                                                                                                                                                                                                                                                                                                                                                                                                                                                                                                                                                                                                                                                                                                                                                                                                                                                                                                                                                                                                                                                                                                                                                                                                                                                                                                                                                                                                                                                                                                                                                                                                                                                                                                                                                                    | Q8VCT3, P02468, P06745, P61148                                                                                                                                         |
|                               | SP_PIR_KEYWORDS                         | Secreted                                    | 5     | 2.05        | 0.999996701                                                                                                                                                                                                                                                                                                                                                                                                                                                                                                                                                                                                                                                                                                                                                                                                                                                                                                                                                                                                                                                                                                                                                                                                                                                                                                                                                                                                                                                                                                                                                                                                                                                                                                                                                                                                                                                                                                                                                                                                                                                                                    | Q8VCT3, P02468, P06745, Q8CC88, P98086                                                                                                                                 |
|                               | GOTERM_CC_FAT                           | GO:0005576-extracellular region             | 6     | 2.46        | 0.999999757                                                                                                                                                                                                                                                                                                                                                                                                                                                                                                                                                                                                                                                                                                                                                                                                                                                                                                                                                                                                                                                                                                                                                                                                                                                                                                                                                                                                                                                                                                                                                                                                                                                                                                                                                                                                                                                                                                                                                                                                                                                                                    | Q8VCT3, P02468, P06745, Q8CC88, P61148, P98086                                                                                                                         |
|                               | Annotation Cluster 76 Category          | Enrichment Score: 1.538419080175349E-7 Term | Count | %           | PValue                                                                                                                                                                                                                                                                                                                                                                                                                                                                                                                                                                                                                                                                                                                                                                                                                                                                                                                                                                                                                                                                                                                                                                                                                                                                                                                                                                                                                                                                                                                                                                                                                                                                                                                                                                                                                                                                                                                                                                                                                                                                                         | Genes                                                                                                                                                                  |
| SP_PIR_KEYWORDS               | disulfide bond                          | 13                                          | 5.33  | 0.999998109 | Q9EQQ9, Q640R3, P97493, Q80UG2, Q61330, Q80TR1, Q8C0L0, P17047, P02468, P63080, Q8BWF0, P98086, Q9QUH0                                                                                                                                                                                                                                                                                                                                                                                                                                                                                                                                                                                                                                                                                                                                                                                                                                                                                                                                                                                                                                                                                                                                                                                                                                                                                                                                                                                                                                                                                                                                                                                                                                                                                                                                                                                                                                                                                                                                                                                         |                                                                                                                                                                        |
| UP_SEQ_FEATURE                | disulfide bond                          | 13                                          | 5.33  | 0.999999802 | Q9EQQ9, Q640R3, P97493, Q80UG2, Q61330, Q80TR1, Q8C0L0, P17047, P02468, P63080, Q8BWF0, P98086, Q9QUH0                                                                                                                                                                                                                                                                                                                                                                                                                                                                                                                                                                                                                                                                                                                                                                                                                                                                                                                                                                                                                                                                                                                                                                                                                                                                                                                                                                                                                                                                                                                                                                                                                                                                                                                                                                                                                                                                                                                                                                                         |                                                                                                                                                                        |
| SP_PIR_KEYWORDS               | signal                                  | 14                                          | 5.74  | 0.999999975 | Q640R3, Q3UVX5, Q8CC88, Q80UG2, Q61330, Q5XJV6, Q80TR1, Q8C0L0, P17047, P02468, Q8BHN3, Q9JKR6, P63080, P98086                                                                                                                                                                                                                                                                                                                                                                                                                                                                                                                                                                                                                                                                                                                                                                                                                                                                                                                                                                                                                                                                                                                                                                                                                                                                                                                                                                                                                                                                                                                                                                                                                                                                                                                                                                                                                                                                                                                                                                                 |                                                                                                                                                                        |
| SP_PIR_KEYWORDS               | glycoprotein                            | 19                                          | 7.79  | 0.999999989 | Q640R3, Q924L1, Q3UVX5, Q8BTY2, Q80UG2, Q61330, Q8BY89, Q9DCP2, Q8BI08, Q9CY27, Q62277, Q80TR1, P17047, P02468, Q8BHN3, Q9JKR6, P63080, Q9EPR4, P98086                                                                                                                                                                                                                                                                                                                                                                                                                                                                                                                                                                                                                                                                                                                                                                                                                                                                                                                                                                                                                                                                                                                                                                                                                                                                                                                                                                                                                                                                                                                                                                                                                                                                                                                                                                                                                                                                                                                                         |                                                                                                                                                                        |
| UP_SEQ_FEATURE                | glycosylation site:N-linked (GlcNAc...) | 19                                          | 7.79  | 1           | Q640R3, Q924L1, Q3UVX5, Q8BTY2, Q80UG2, Q61330, Q8BY89, Q9DCP2, Q8BI08, Q9CY27, Q62277, Q80TR1, P17047, P02468, Q8BHN3, Q9JKR6, P63080, Q9EPR4, P98086                                                                                                                                                                                                                                                                                                                                                                                                                                                                                                                                                                                                                                                                                                                                                                                                                                                                                                                                                                                                                                                                                                                                                                                                                                                                                                                                                                                                                                                                                                                                                                                                                                                                                                                                                                                                                                                                                                                                         |                                                                                                                                                                        |
| UP_SEQ_FEATURE                | signal peptide                          | 14                                          | 5.74  | 1           | Q640R3, Q3UVX5, Q8CC88, Q80UG2, Q61330, Q5XJV6, Q80TR1, Q8C0L0, P17047, P02468, Q8BHN3, Q9JKR6, P63080, P98086                                                                                                                                                                                                                                                                                                                                                                                                                                                                                                                                                                                                                                                                                                                                                                                                                                                                                                                                                                                                                                                                                                                                                                                                                                                                                                                                                                                                                                                                                                                                                                                                                                                                                                                                                                                                                                                                                                                                                                                 |                                                                                                                                                                        |
| Unclustered terms             |                                         |                                             |       |             |                                                                                                                                                                                                                                                                                                                                                                                                                                                                                                                                                                                                                                                                                                                                                                                                                                                                                                                                                                                                                                                                                                                                                                                                                                                                                                                                                                                                                                                                                                                                                                                                                                                                                                                                                                                                                                                                                                                                                                                                                                                                                                |                                                                                                                                                                        |
| SP_PIR_KEYWORDS               | phosphoprotein                          | 164                                         | 67.21 | 8.33551E-25 | O54774, P97441, P32921, P21619, Q8VBV7, O54962, P23116, Q8BKCS, Q64737, Q8BY87, P59708, Q8CCN5, P98203, Q8CHH9, Q6P9K8, Q8BWF0, Q9JMH9, Q5SSM3, P70336, Q99020, Q6A065, O35609, Q8R4H2, P14115, Q9CYB5, Q80X50, P54775, P52196, P19096, Q8C1B1, Q9CXW3, Q148V7, Q8QZZ7, Q5DU25, Q3UH68, Q9CQX8, Q8BIJ6, Q91V92, Q8K2C9, O08788, Q9D051, Q8CGY8, Q9CR95, Q9D8S9, Q80UJ7, Q9D8T7, Q58A65, Q00612, Q9D1L0, Q9EPR4, Q7S1G6, Q5SXY1, P28740, P48722, Q9QWI6, P08556, P54285, Q8BGQ7, O88712, P58281, P05063, Q9CZD3, P50396, Q8C0L0, Q3UPL0, Q8BRT1, P27546, Q8BMM3, Q9ERU9, Q9DB70, P03893, Q9DBR7, Q9CQI3, Q9EQQ9, Q6PAR5, Q9Z2H5, Q9CPR4, Q9R1Z7, Q03173, Q8VD37, Q99L43, Q9D832, Q60668, Q7TSC1, Q9QWY8, Q9Z1B3, Q60865, Q6Y7W8, Q9Z130, Q9D8E6, Q7TQ95, Q8K394, Q3V0K9, P84091, O08585, Q91WV0, P63001, Q8BTY2, Q6PFD5, P06745, Q05920, Q61301, Q4ACU6, Q9DCP2, Q62277, P54227, Q91VR8, Q7TMB8, Q3UHD9, P12367, Q0GNC1, Q9JL26, Q6NVE8, P84086, Q4KMM3, P36536, Q64152, Q9D0R2, Q791T5, Q8CGF7, Q640R3, A2AG50, Q5F2E8, Q62446, Q6PDI5, Q8CDG3, Q9Z3D5, P14206, Q61316, P35123, Q8BVQ5, Q80TR1, Q9QXL2, P19246, Q9ERG2, Q8K310, Q68FD9, Q8K3H0, O70161, Q9DB27, Q8JZR6, Q8BWO6, Q811D0, Q9D0L7, P05201, P10922, Q3TDD9, Q3UU96, P26638, P39054, Q80UG2, Q80U49, Q9EPW0, Q3TES0, Q5XJV6, Q9D5V5, Q80U40, P60469, Q60902, Q3U0V1, Q9CQI3, P54071, Q11011, Q6PAR5, P21619, Q60597, Q8BKCS, P23116, Q9CQV7, Q8BY87, Q9CY27, Q64737, Q7TSC1, P59708, Q60668, Q9Z1B3, Q9DCW4, P61458, Q8CHH9, Q8BWF0, P61971, Q9Z130, Q8BU30, Q9D8E6, Q8K394, Q810B6, P97450, Q99020, O35127, Q07076, Q91WV0, P06745, P56382, Q91YE6, P62627, P14115, Q05920, Q61301, P54227, Q91VR8, Q7TMB8, Q9ERS2, P54775, Q80X50, P12367, P52196, Q8BGS2, Q6NVE8, P84086, Q9ESW4, P19096, Q9CZU6, P84089, Q9QUH0, Q9CXW3, Q9D0R2, Q9CPP6, Q8VCT3, Q148V7, P97493, Q8BIJ6, Q62446, Q91V92, O08788, Q8CGY8, Q8CDG3, Q9Z3D5, P14206, Q61316, Q8BVQ5, Q58A65, Q8BLY2, Q00612, Q8K310, Q9DB27, Q9CQ60, P48722, Q61035, P26638, P39054, Q8R5J9, Q80UG2, Q8BGQ7, Q9EQ80, P58281, P05063, Q9CZD3, Q9ERD7, Q60902, Q3U0V1, P27546, Q9ERU9 |                                                                                                                                                                        |
| SP_PIR_KEYWORDS               | acetylation                             | 92                                          | 37.70 | 1.17312E-22 | Q9EQQ9, O54774, Q11011, P32921, Q9Z2H5, Q8VBV7, O54962, Q8BKCS, P23116, Q03173, Q7TSC1, Q60668, Q9QWY8, P61458, Q60865, Q8CHH9, Q8BPM0, Q6P9K8, Q9Z130, P61971, Q8BU30, Q9JMH9, Q810B6, Q8K394, P70336, Q99020, Q3V0K9, Q8BIW1, Q6A065, Q9CPW4, Q9CQW1, P06745, Q8R4H2, Q91YE6, P62627, Q61301, Q4ACU6, P54227, Q91VR8, Q3UHD9, Q9QYB5, Q7TMB8, P54775, Q9JL26, Q6NVE8, P84086, P19096, Q9QUH0, Q9CXW3, Q9D0R2, Q640R3, Q8QZZ7, Q5DU25, P28271, Q5F2E8, Q91V92, O08788, Q8CGY8, Q6PDI5, P14206, Q9Z3D5, Q80UJ7, Q61316, Q58A65, Q9QXL2, Q8BLY2, Q9ERG2, Q7S1G6, Q9JI46, Q9DB27, Q9CQ60, P05201, P28740, P48722, Q9QWI6, Q9WVLO, Q3UU96, P26638, Q8R5J9, P39054, Q80U49, Q8BGQ7, O88712, Q9EQ80, Q3TES0, P50396, Q3UPL0, P60469, Q3U0V1, Q8BRT1, Q9JKK7, O88851, Q61699, Q69ZW3, Q9DBR7                                                                                                                                                                                                                                                                                                                                                                                                                                                                                                                                                                                                                                                                                                                                                                                                                                                                                                                                                                                                                                                                                                                                                                                                                                                                                                         |                                                                                                                                                                        |
| SP_PIR_KEYWORDS               | cytoplasm                               | 95                                          | 38.93 | 2.64391E-16 | Q9EQQ9, P32921, Q6PAR5, Q9Z2H5, P21619, Q3UVX5, Q60597, Q8BKCS, Q8BY89, Q8VD37, Q03173, Q9CQV7, Q8BY87, Q64737, Q60668, Q9QWY8, Q8CCN5, Q9Z1B3, P98203, Q80ZJ1, P17047, Q6Y7W8, Q8CHH9, Q8BPM0, Q6P9K8, Q9JMH9, Q5SSM3, Q810B6, Q9CPW2, Q6A065, Q8BTY2, Q8CC88, Q61301, Q3UHD9, Q9QYB5, Q7TMB8, Q80X50, Q0GNC1, Q9JL26, Q8BGS2, Q6NVE8, Q4KMM3, Q9ESW4, Q64152, Q8C1B1, Q791T5, Q8CGF7, Q148V7, Q924L1, A2AG50, Q3UH68, O08788, Q8CGY8, Q6PDI5, Q8CDG3, Q3U487, Q9D8T7, Q80TR1, Q58A65, Q9QXL2, Q8BHN3, Q68FD9, O70161, Q9EPR4, Q7S1G6, Q5SXY1, Q8BWO6, Q8JZR6, Q9DB27, Q811D0, Q9D0L7, P28740, P48722, Q9QWI6, Q3TDD9, P54285, Q3UU96, P39054, Q80U49, O88712, Q9EPW0, P58281, Q80U40, Q3UPL0, Q60902, P27546, Q8BRT1, Q9JKK7, Q05A62, Q8BWR2, P62881, Q61699, Q69ZW3, Q9DBR7                                                                                                                                                                                                                                                                                                                                                                                                                                                                                                                                                                                                                                                                                                                                                                                                                                                                                                                                                                                                                                                                                                                                                                                                                                                                                                                 |                                                                                                                                                                        |
| SP_PIR_KEYWORDS               | alternative splicing                    | 94                                          | 38.52 | 2.28687E-06 | Q9EQQ9, P32921, Q6PAR5, Q9Z2H5, P21619, Q3UVX5, Q60597, Q8BKCS, Q8BY89, Q8VD37, Q03173, Q9CQV7, Q8BY87, Q64737, Q60668, Q9QWY8, Q8CCN5, Q9Z1B3, P98203, Q80ZJ1, P17047, Q6Y7W8, Q8CHH9, Q8BPM0, Q6P9K8, Q9JMH9, Q5SSM3, Q810B6, Q9CPW2, Q6A065, Q8BTY2, Q8CC88, Q61301, Q3UHD9, Q9QYB5, Q7TMB8, Q80X50, Q0GNC1, Q9JL26, Q8BGS2, Q6NVE8, Q4KMM3, Q9ESW4, Q64152, Q8C1B1, Q791T5, Q8CGF7, Q148V7, Q924L1, A2AG50, Q3UH68, O08788, Q8CGY8, Q6PDI5, Q8CDG3, Q3U487, Q9D8T7, Q80TR1, Q58A65, Q9QXL2, Q8BHN3, Q68FD9, O70161, Q9EPR4, Q7S1G6, Q5SXY1, Q8BWO6, Q8JZR6, Q9DB27, Q811D0, Q9D0L7, P28740, P48722, Q9QWI6, Q3TDD9, P54285, Q3UU96, P39054, Q80U49, O88712, Q9EPW0, P58281, Q80U40, Q3UPL0, Q60902, P27546, Q8BRT1, Q9JKK7, Q05A62, Q8BWR2, P62881, Q61699, Q69ZW3, Q9DBR7                                                                                                                                                                                                                                                                                                                                                                                                                                                                                                                                                                                                                                                                                                                                                                                                                                                                                                                                                                                                                                                                                                                                                                                                                                                                                                                 |                                                                                                                                                                        |

|                        |                                                                                         |    |       |             |                                                                                                                                                                                                                                                                                                                                                                                                                                                                                                                                                                                                                                                                                                                                                                          |
|------------------------|-----------------------------------------------------------------------------------------|----|-------|-------------|--------------------------------------------------------------------------------------------------------------------------------------------------------------------------------------------------------------------------------------------------------------------------------------------------------------------------------------------------------------------------------------------------------------------------------------------------------------------------------------------------------------------------------------------------------------------------------------------------------------------------------------------------------------------------------------------------------------------------------------------------------------------------|
| SP_PIR_KEYWORDS        | coiled coil                                                                             | 47 | 19.26 | 5.84578E-06 | Q8CGF7, P21619, Q148V7, A2AG50, Q5DU25, Q5F2E8, Q3UH68, O08788, Q8K2C9, P23116, Q03173, Q923D5, P98203, Q58A65, Q9QXL2, P19246, Q8BLY2, Q60865, Q8CHH9, Q8BPM0, Q9ERG2, Q8K3H0, Q75IG6, Q9JMH9, Q7TQ95, Q5SXY1, P70336, P28740, Q9QW16, Q6A065, Q3TDD9, Q3UU96, Q9CQW1, Q8R4H2, Q4ACU6, P58281, Q3TES0, P54227, Q91VR8, Q60902, P60469, Q0GNC1, P02468, Q6NVE8, Q8BRT1, P84086, Q692W3                                                                                                                                                                                                                                                                                                                                                                                   |
| UP_SEQ_FEATURE         | splice variant                                                                          | 93 | 38.11 | 0.000369031 | Q9EQQ9, P32921, Q6PAR5, Q9Z2H5, P21619, Q3UUVX5, Q60597, Q8BKCS, Q8BY89, Q8VD37, Q03173, Q9CQV7, Q8BY87, Q64737, Q60668, Q9QWY8, Q8CCN5, Q9Z1B3, P98203, Q80Z11, P17047, Q6Y7W8, Q8CHH9, Q8BPM0, Q6P9K8, Q9JMH9, Q5SSM3, Q810B6, Q9CPW2, Q6A065, Q8BLY2, Q8CC88, Q61301, Q3UHD9, Q9QYB5, Q7TMB8, Q80X50, Q0GNC1, Q9JL26, Q8BGS2, Q6NVE8, Q4KMM3, Q9ESW4, Q64152, Q8C1B1, Q791T5, Q8CGF7, Q148V7, Q924L1, A2AG50, Q3UH68, O08788, Q8CGY8, Q6PDI5, Q8CDG3, Q3U487, Q9D8T7, Q80TR1, Q58A65, Q9QXL2, Q8BHN3, Q68FD9, O70161, Q9EPR4, Q75IG6, Q5SXY1, Q8BWWQ6, Q8JZR6, Q9DB27, Q811D0, Q9D0L7, P28740, P48722, Q9QW16, Q3TDD9, Q3UU96, P39054, Q80U49, O88712, Q9EPW0, P58281, Q80U40, Q3UPL0, Q60902, P27546, Q8BRT1, Q9JKK7, Q05A62, Q8BWR2, P62881, Q61699, Q692W3, Q9DBR7 |
| UP_SEQ_FEATURE         | compositionally biased region:Pro-rich                                                  | 24 | 9.84  | 0.000486687 | Q8CGF7, Q5DU25, P39054, Q03173, Q8VD37, Q4ACU6, Q8CDG3, Q3TES0, Q923D5, Q9QWY8, Q5XJV6, Q60902, Q3UPL0, Q0GNC1, Q9JL26, Q6Y7W8, Q6NVE8, Q8BMI3, Q8BPM0, Q6P9K8, Q692W3, Q5SSM3, Q75IG6, Q7TQ95                                                                                                                                                                                                                                                                                                                                                                                                                                                                                                                                                                           |
| GOTERM_CC_FAT          | GO:0005768-endosome                                                                     | 12 | 4.92  | 0.00083931  | Q810B6, Q6PAR5, Q3UHD9, Q3UPL0, P17047, Q9D1C8, O88653, Q6NVE8, Q8BMI3, Q9JKD3, Q8K3H0, Q6PDI5                                                                                                                                                                                                                                                                                                                                                                                                                                                                                                                                                                                                                                                                           |
| UP_SEQ_FEATURE         | domain:WHEP-TRS                                                                         | 3  | 1.23  | 0.001347319 | Q9CZD3, P32921, Q61035                                                                                                                                                                                                                                                                                                                                                                                                                                                                                                                                                                                                                                                                                                                                                   |
| SP_PIR_KEYWORDS        | endosome                                                                                | 10 | 4.10  | 0.001512208 | Q810B6, Q6PAR5, P17047, Q9D1C8, O88653, Q6NVE8, Q8BMI3, Q9JKD3, Q8K3H0, Q6PDI5                                                                                                                                                                                                                                                                                                                                                                                                                                                                                                                                                                                                                                                                                           |
| GOTERM_CC_FAT          | GO:0009898-internal side of plasma membrane                                             | 12 | 4.92  | 0.002367904 | O54774, Q9QYB5, Q3UPL0, Q640R3, P08556, Q80Z11, P84091, O88653, O08585, Q9CQW1, P63001, Q61301                                                                                                                                                                                                                                                                                                                                                                                                                                                                                                                                                                                                                                                                           |
| INTERPRO               | IPR000738:WHEP-TRS                                                                      | 3  | 1.23  | 0.002461186 | Q9CZD3, P32921, Q61035                                                                                                                                                                                                                                                                                                                                                                                                                                                                                                                                                                                                                                                                                                                                                   |
| INTERPRO               | IPR012947:Threonyl/alanyl tRNA synthetase, SAD                                          | 3  | 1.23  | 0.002461186 | Q8BLY2, Q8BGQ7, Q9D0R2                                                                                                                                                                                                                                                                                                                                                                                                                                                                                                                                                                                                                                                                                                                                                   |
| GOTERM_MF_FAT          | GO:0005522-profilin binding                                                             | 3  | 1.23  | 0.002498445 | Q7TMB8, Q9JL26, Q03173                                                                                                                                                                                                                                                                                                                                                                                                                                                                                                                                                                                                                                                                                                                                                   |
| GOTERM_CC_FAT          | GO:0012505-endomembrane system                                                          | 17 | 6.97  | 0.003436707 | Q811D0, Q07076, P21619, Q9Z2I2, P84091, O08585, O35609, Q91YE6, Q9JKD3, Q8BKCS, Q9C995, Q62277, P17047, Q60902, Q9ERU9, O70161, Q9CXW3                                                                                                                                                                                                                                                                                                                                                                                                                                                                                                                                                                                                                                   |
| KEGG_PATHWAY           | mmu04810:Regulation of actin cytoskeleton                                               | 11 | 4.51  | 0.003985384 | Q91VR8, P70336, Q7TMB8, P08556, Q9CPW4, P63001, Q8R4H2, Q03173, O70161, P61148, Q9DBR7                                                                                                                                                                                                                                                                                                                                                                                                                                                                                                                                                                                                                                                                                   |
| SP_PIR_KEYWORDS        | multifunctional enzyme                                                                  | 5  | 2.05  | 0.007770003 | Q9EQQ9, Q9WVLO, P19096, Q05920, Q64737                                                                                                                                                                                                                                                                                                                                                                                                                                                                                                                                                                                                                                                                                                                                   |
| BIOCARTA               | m_malatexPathway:Shuttle for transfer of acetyl groups from mitochondria to the cytosol | 3  | 1.23  | 0.008815091 | Q91V92, Q05920, Q9CZU6                                                                                                                                                                                                                                                                                                                                                                                                                                                                                                                                                                                                                                                                                                                                                   |
| KEGG_PATHWAY           | mmu00480:Glutathione metabolism                                                         | 5  | 2.05  | 0.011984823 | P54071, Q9CPU4, Q9D7X8, Q9WVLO, Q00612                                                                                                                                                                                                                                                                                                                                                                                                                                                                                                                                                                                                                                                                                                                                   |
| KEGG_PATHWAY           | mmu00290:Valine, leucine and isoleucine biosynthesis                                    | 3  | 1.23  | 0.014645204 | Q8BJU6, Q8BU30, Q9D051                                                                                                                                                                                                                                                                                                                                                                                                                                                                                                                                                                                                                                                                                                                                                   |
| GOTERM_CC_FAT          | GO:0019898-extrinsic to membrane                                                        | 14 | 5.74  | 0.015358958 | Q810B6, P70336, Q811D0, Q6PAR5, Q9Z2H5, Q9D1C8, P63001, Q6PFD5, Q3UPL0, Q60902, Q8BMI3, Q9ERG2, Q8K3H0, Q75IG6                                                                                                                                                                                                                                                                                                                                                                                                                                                                                                                                                                                                                                                           |
| INTERPRO               | IPR012675:Beta-grasp fold, ferredoxin-type                                              | 3  | 1.23  | 0.015945537 | Q9CPW2, Q8BLY2, Q9D0R2                                                                                                                                                                                                                                                                                                                                                                                                                                                                                                                                                                                                                                                                                                                                                   |
| GOTERM_CC_FAT          | GO:0005829-cytosol                                                                      | 15 | 6.15  | 0.02207591  | Q6PAR5, P05201, Q07076, Q9D1C8, Q9D7X8, P28271, Q9WVLO, P63001, Q9CQW1, O88712, P54775, Q9JL26, Q60865, Q6NVE8, P84086                                                                                                                                                                                                                                                                                                                                                                                                                                                                                                                                                                                                                                                   |
| SP_PIR_KEYWORDS        | lyase                                                                                   | 6  | 2.46  | 0.024947971 | P61458, P28271, Q9R127, P19096, Q91V92, P05063                                                                                                                                                                                                                                                                                                                                                                                                                                                                                                                                                                                                                                                                                                                           |
| KEGG_PATHWAY           | mmu04666:Fc gamma R-mediated phagocytosis                                               | 6  | 2.46  | 0.026566676 | Q9CPW4, P63001, P39054, O70161, Q75IG6, Q9QWY8                                                                                                                                                                                                                                                                                                                                                                                                                                                                                                                                                                                                                                                                                                                           |
| GOTERM_BP_FAT          | GO:0043648-dicarboxylic acid metabolic process                                          | 3  | 1.23  | 0.029234612 | P05201, Q8BWF0, Q05920                                                                                                                                                                                                                                                                                                                                                                                                                                                                                                                                                                                                                                                                                                                                                   |
| GOTERM_CC_FAT          | GO:0044455-mitochondrial membrane part                                                  | 4  | 1.64  | 0.03103387  | P97450, Q9ERS2, P56382, P58281                                                                                                                                                                                                                                                                                                                                                                                                                                                                                                                                                                                                                                                                                                                                           |
| INTERPRO               | IPR013816:ATP-grasp fold, subdomain 2                                                   | 3  | 1.23  | 0.033048556 | Q91V92, Q05920, Q64737                                                                                                                                                                                                                                                                                                                                                                                                                                                                                                                                                                                                                                                                                                                                                   |
| SP_PIR_KEYWORDS        | translocation                                                                           | 4  | 1.64  | 0.057631737 | Q9CQ85, Q9ERU9, P61620, Q9CQV7                                                                                                                                                                                                                                                                                                                                                                                                                                                                                                                                                                                                                                                                                                                                           |
| UP_SEQ_FEATURE         | compositionally biased region:Poly-Glu                                                  | 11 | 4.51  | 0.060407935 | Q8JZR6, Q8BVQ5, Q3UUVX5, Q5DU25, Q9JKR6, Q5F2E8, Q9ERU9, Q8VD37, Q692W3, Q7TSC1, Q3TES0                                                                                                                                                                                                                                                                                                                                                                                                                                                                                                                                                                                                                                                                                  |
| SP_PIR_KEYWORDS        | coated pit                                                                              | 3  | 1.23  | 0.061642569 | Q60902, P84091, O08585                                                                                                                                                                                                                                                                                                                                                                                                                                                                                                                                                                                                                                                                                                                                                   |
| GOTERM_BP_FAT          | GO:0007017-microtubule-based process                                                    | 7  | 2.87  | 0.065678086 | P54227, P28740, Q9ERD7, Q9QXL2, P19246, Q3UU96, P62627                                                                                                                                                                                                                                                                                                                                                                                                                                                                                                                                                                                                                                                                                                                   |
| GOTERM_CC_FAT          | GO:0044440-endosomal part                                                               | 3  | 1.23  | 0.085827234 | Q810B6, Q6NVE8, Q8K3H0                                                                                                                                                                                                                                                                                                                                                                                                                                                                                                                                                                                                                                                                                                                                                   |
| GOTERM_CC_FAT          | GO:0010008-endosome membrane                                                            | 3  | 1.23  | 0.085827234 | Q810B6, Q6NVE8, Q8K3H0                                                                                                                                                                                                                                                                                                                                                                                                                                                                                                                                                                                                                                                                                                                                                   |
| GOTERM_CC_FAT          | GO:0005794-Golgi apparatus                                                              | 15 | 6.15  | 0.097051786 | O54774, Q64310, P08556, P28271, O08585, O35609, Q9CQW1, Q9JKD3, Q8CDG3, Q8BHN3, Q6NVE8, Q8BRT1, Q8BMI3, P36536, Q75IG6                                                                                                                                                                                                                                                                                                                                                                                                                                                                                                                                                                                                                                                   |
| COG_ONTOLOGY           | Cell division and chromosome partitioning                                               | 4  | 1.64  | 0.098115822 | P70336, Q3UU96, Q91YE6, Q5SXY1                                                                                                                                                                                                                                                                                                                                                                                                                                                                                                                                                                                                                                                                                                                                           |
| ion transport/channels | GOTERM_BP_FAT                                                                           | 5  | 2.05  | 0.098673831 | Q8JZR6, P52196, Q8R5J9, Q8BLY2, Q8BH59                                                                                                                                                                                                                                                                                                                                                                                                                                                                                                                                                                                                                                                                                                                                   |
| GOTERM_MF_FAT          | GO:0016836-hydro-lyase activity                                                         | 3  | 1.23  | 0.105536854 | P61458, P28271, P19096                                                                                                                                                                                                                                                                                                                                                                                                                                                                                                                                                                                                                                                                                                                                                   |
| KEGG_PATHWAY           | mmu04310:Wnt signaling pathway                                                          | 6  | 2.46  | 0.114076442 | P70336, Q9Z1B3, P63001, Q8BPM0, O88712, Q9CXW3                                                                                                                                                                                                                                                                                                                                                                                                                                                                                                                                                                                                                                                                                                                           |
| UP_SEQ_FEATURE         | active site:Proton donor                                                                | 6  | 2.46  | 0.123579485 | Q8VCT3, Q11011, Q8BHN3, P06745, O88712, Q64737                                                                                                                                                                                                                                                                                                                                                                                                                                                                                                                                                                                                                                                                                                                           |
| GOTERM_CC_FAT          | GO:0005783-endoplasmic reticulum                                                        | 17 | 6.97  | 0.127315576 | Q811D0, Q9D0L7, Q64310, Q9CPU4, Q9Z2I2, P28271, Q8R5J9, Q9CQW1, P61620, Q6PDI5, Q8CDG3, Q99L43, Q9CY27, Q3UPL0, Q8BHN3, Q9JKR6, P36536                                                                                                                                                                                                                                                                                                                                                                                                                                                                                                                                                                                                                                   |
| neuron                 | GOTERM_CC_FAT                                                                           | 7  | 2.87  | 0.129695489 | Q9ERD7, Q60865, P63080, P84086, Q61330, Q61301, P58281                                                                                                                                                                                                                                                                                                                                                                                                                                                                                                                                                                                                                                                                                                                   |

|                                    |                                                              |                                                  |       |             |                                                                                                                                                                                                                                                                                                                                                                        |                                                                                                                                |
|------------------------------------|--------------------------------------------------------------|--------------------------------------------------|-------|-------------|------------------------------------------------------------------------------------------------------------------------------------------------------------------------------------------------------------------------------------------------------------------------------------------------------------------------------------------------------------------------|--------------------------------------------------------------------------------------------------------------------------------|
|                                    | SP_PIR_KEYWORDS                                              | golgi apparatus                                  | 12    | 4.92        | 0.129714639                                                                                                                                                                                                                                                                                                                                                            | O54774, Q64310, P08556, Q6NVE8, Q8BHN3, Q9CQW1, Q8BRT1, Q8BMI3, Q9JKD3, P36536, Q8CDG3, Q7SIG6                                 |
|                                    | KEGG_PATHWAY                                                 | mmu04070:Phosphatidylinositol signaling system   | 4     | 1.64        | 0.138984775                                                                                                                                                                                                                                                                                                                                                            | Q9Z1B3, O70161, Q9EPW0, Q99L43                                                                                                 |
|                                    | SP_PIR_KEYWORDS                                              | growth regulation                                | 3     | 1.23        | 0.14154955                                                                                                                                                                                                                                                                                                                                                             | Q9DB27, Q9D0L7, Q640R3                                                                                                         |
|                                    | SP_PIR_KEYWORDS                                              | lipid synthesis                                  | 4     | 1.64        | 0.149825964                                                                                                                                                                                                                                                                                                                                                            | P19096, Q91V92, Q05920, Q9CY27                                                                                                 |
|                                    | GOTERM_CC_FAT                                                | GO:0034399-nuclear periphery                     | 3     | 1.23        | 0.149877526                                                                                                                                                                                                                                                                                                                                                            | Q8CGF7, P21619, Q8K310                                                                                                         |
|                                    | UP_SEQ_FEATURE                                               | short sequence motif:Nuclear localization signal | 8     | 3.28        | 0.150576575                                                                                                                                                                                                                                                                                                                                                            | Q8CGF7, P35123, P98203, Q11011, P21619, Q91WV0, Q8K310, Q8CGY8                                                                 |
|                                    | KEGG_PATHWAY                                                 | mmu00620:Pyruvate metabolism                     | 3     | 1.23        | 0.157081662                                                                                                                                                                                                                                                                                                                                                            | P56375, Q05920, Q9D051                                                                                                         |
|                                    | COG_ONTOLOGY                                                 | Translation, ribosomal structure and biogenesis  | 3     | 1.23        | 0.169092775                                                                                                                                                                                                                                                                                                                                                            | Q9DB27, Q9CZD3, Q61035                                                                                                         |
| neuron<br>development<br>signaling | GOTERM_BP_FAT                                                | GO:0007265-Ras protein signal transduction       | 3     | 1.23        | 0.188586241                                                                                                                                                                                                                                                                                                                                                            | P70336, P08556, Q8K2C9                                                                                                         |
|                                    | GOTERM_CC_FAT                                                | GO:0030424-axon                                  | 4     | 1.64        | 0.189072765                                                                                                                                                                                                                                                                                                                                                            | Q9ERD7, P63080, Q61330, Q61301                                                                                                 |
|                                    | KEGG_PATHWAY                                                 | mmu04360:Axon guidance                           | 5     | 2.05        | 0.189524567                                                                                                                                                                                                                                                                                                                                                            | P70336, P08556, P63001, Q8R4H2, Q80UG2                                                                                         |
|                                    | GOTERM_BP_FAT                                                | GO:0000165-MAPKKK cascade                        | 4     | 1.64        | 0.198747782                                                                                                                                                                                                                                                                                                                                                            | Q58A65, O88653, Q8K2C9, Q4ACU6                                                                                                 |
|                                    | GOTERM_MF_FAT                                                | GO:0016407-acetyltransferase activity            | 3     | 1.23        | 0.201343872                                                                                                                                                                                                                                                                                                                                                            | Q9EQQ9, P19096, Q8CGY8                                                                                                         |
|                                    | SP_PIR_KEYWORDS                                              | endoplasmic reticulum                            | 13    | 5.33        | 0.207171409                                                                                                                                                                                                                                                                                                                                                            | Q811D0, Q9D0L7, Q64310, Q9CPU4, Q8R5J9, P61620, Q6PDI5, Q8CDG3, Q9CY27, Q3UPL0, Q8BHN3, Q9JKR6, P36536                         |
|                                    | SMART                                                        | SM00454:SAM                                      | 3     | 1.23        | 0.21148459                                                                                                                                                                                                                                                                                                                                                             | P60469, Q6P9K8, Q4ACU6                                                                                                         |
|                                    | GOTERM_MF_FAT                                                | GO:0019842-vitamin binding                       | 4     | 1.64        | 0.213771471                                                                                                                                                                                                                                                                                                                                                            | P05201, Q60597, P19096, Q05920                                                                                                 |
|                                    | SP_PIR_KEYWORDS                                              | nucleotide binding                               | 3     | 1.23        | 0.21389347                                                                                                                                                                                                                                                                                                                                                             | P28740, P63001, P36536                                                                                                         |
|                                    | SP_PIR_KEYWORDS                                              | P-loop                                           | 3     | 1.23        | 0.21885416                                                                                                                                                                                                                                                                                                                                                             | P28740, P63001, P36536                                                                                                         |
|                                    | KEGG_PATHWAY                                                 | mmu00562:Inositol phosphate metabolism           | 3     | 1.23        | 0.238747171                                                                                                                                                                                                                                                                                                                                                            | Q9Z1B3, O70161, Q9EPW0                                                                                                         |
|                                    | GOTERM_BP_FAT                                                | GO:0007242-intracellular signaling cascade       | 16    | 6.56        | 0.25112417                                                                                                                                                                                                                                                                                                                                                             | Q8K394, P70336, P08556, Q3UU96, P63001, Q8R4H2, Q8K2C9, Q4ACU6, Q7TSC1, P54227, Q9Z1B3, Q3UHD9, P50396, Q58A65, Q80ZJ1, O88653 |
|                                    | GOTERM_BP_FAT                                                | GO:0010564-regulation of cell cycle process      | 3     | 1.23        | 0.257962433                                                                                                                                                                                                                                                                                                                                                            | P70336, Q3U487, Q7TSC1                                                                                                         |
|                                    | GOTERM_BP_FAT                                                | GO:0040008-regulation of growth                  | 6     | 2.46        | 0.263507118                                                                                                                                                                                                                                                                                                                                                            | Q9DB27, Q811D0, Q9ERS2, Q9D0L7, Q640R3, Q00612                                                                                 |
|                                    | UP_SEQ_FEATURE                                               | domain:C2                                        | 3     | 1.23        | 0.275883197                                                                                                                                                                                                                                                                                                                                                            | Q8K394, Q9Z1B3, Q9EPW0                                                                                                         |
| GOTERM_BP_FAT                      | GO:0055085-transmembrane transport                           | 9                                                | 3.69  | 0.280482293 | P97441, P97450, Q9CQ85, P56382, Q9ERU9, P61620, Q9EPR4, Q9CQV7, Q8BH59                                                                                                                                                                                                                                                                                                 |                                                                                                                                |
| SP_PIR_KEYWORDS                    | er-golgi transport                                           | 3                                                | 1.23  | 0.288844212 | Q3UPL0, Q9CQW1, P36536                                                                                                                                                                                                                                                                                                                                                 |                                                                                                                                |
| GOTERM_CC_FAT                      | GO:0005886-plasma membrane                                   | 45                                               | 18.44 | 0.301079006 | P97441, O54774, Q8VCT3, Q640R3, Q9D1C8, Q3UVX5, Q61330, Q03173, Q9CR95, P14206, P98203, Q80TR1, P17047, Q80ZJ1, P63080, O70161, Q9EPR4, Q7SIG6, P70336, Q811D0, Q07076, P08556, Q8BIW1, P84091, P54285, O08585, Q9CQW1, P39054, P63001, Q6PFD5, Q8BTY2, Q80UG2, Q9JKD3, Q61301, Q4ACU6, Q8BI08, Q9DCP2, Q62277, Q7TMB8, Q9QYB5, Q80U40, Q3UPL0, Q60902, O88653, P62881 |                                                                                                                                |
| KEGG_PATHWAY                       | mmu04010:MAPK signaling pathway                              | 7                                                | 2.87  | 0.306913369 | P54227, P08556, O88653, P54285, Q5F2E8, P63001, P61148                                                                                                                                                                                                                                                                                                                 |                                                                                                                                |
| GOTERM_MF_FAT                      | GO:0030145-manganese ion binding                             | 4                                                | 1.64  | 0.309361966 | P54071, Q8BIW1, Q05920, Q64737                                                                                                                                                                                                                                                                                                                                         |                                                                                                                                |
| SP_PIR_KEYWORDS                    | manganese                                                    | 4                                                | 1.64  | 0.311610954 | P54071, Q8BIW1, Q05920, Q64737                                                                                                                                                                                                                                                                                                                                         |                                                                                                                                |
| INTERPRO                           | IPR001660:Sterile alpha motif SAM                            | 3                                                | 1.23  | 0.314669842 | P60469, Q6P9K8, Q4ACU6                                                                                                                                                                                                                                                                                                                                                 |                                                                                                                                |
| INTERPRO                           | IPR016040:NAD(P)-binding domain                              | 4                                                | 1.64  | 0.315693714 | Q00612, P19096, Q91V92, O88712                                                                                                                                                                                                                                                                                                                                         |                                                                                                                                |
| SP_PIR_KEYWORDS                    | Proto-oncogene                                               | 3                                                | 1.23  | 0.323706453 | P35123, P08556, Q924L1                                                                                                                                                                                                                                                                                                                                                 |                                                                                                                                |
| SP_PIR_KEYWORDS                    | Chaperone                                                    | 4                                                | 1.64  | 0.330077042 | P48722, Q9JKR6, Q9CQV7, Q9D832                                                                                                                                                                                                                                                                                                                                         |                                                                                                                                |
| GOTERM_CC_FAT                      | GO:0042470-melanosome                                        | 3                                                | 1.23  | 0.334315709 | Q8BHN3, P63001, P19096                                                                                                                                                                                                                                                                                                                                                 |                                                                                                                                |
| GOTERM_CC_FAT                      | GO:0048770-pigment granule                                   | 3                                                | 1.23  | 0.334315709 | Q8BHN3, P63001, P19096                                                                                                                                                                                                                                                                                                                                                 |                                                                                                                                |
| GOTERM_BP_FAT                      | GO:0008610-lipid biosynthetic process                        | 6                                                | 2.46  | 0.338829753 | Q8VCT3, P19096, Q91V92, Q05920, Q9CY27, Q99L43                                                                                                                                                                                                                                                                                                                         |                                                                                                                                |
| KEGG_PATHWAY                       | mmu04270:Vascular smooth muscle contraction                  | 4                                                | 1.64  | 0.342677479 | P70336, Q9Z1B3, Q8R4H2, Q9DBR7                                                                                                                                                                                                                                                                                                                                         |                                                                                                                                |
| GOTERM_MF_FAT                      | GO:0048037-cofactor binding                                  | 5                                                | 2.05  | 0.346630681 | P54071, P05201, Q60597, P19096, O88712                                                                                                                                                                                                                                                                                                                                 |                                                                                                                                |
| SP_PIR_KEYWORDS                    | cell membrane                                                | 26                                               | 10.66 | 0.370944869 | Q9D1C8, Q3UVX5, Q61330, Q9CR95, P14206, Q80TR1, Q80ZJ1, P17047, P63080, Q7SIG6, Q811D0, P70336, P08556, P84091, P63001, P39054, Q8BTY2, Q6PFD5, Q9JKD3, Q4ACU6, Q61301, Q9DCP2, Q8BI08, Q9QYB5, Q80U40, Q60902                                                                                                                                                         |                                                                                                                                |
| GOTERM_BP_FAT                      | GO:0007346-regulation of mitotic cell cycle                  | 3                                                | 1.23  | 0.371717581 | Q811D0, Q3U487, Q7TSC1                                                                                                                                                                                                                                                                                                                                                 |                                                                                                                                |
| GOTERM_BP_FAT                      | GO:0007005-mitochondrion organization                        | 3                                                | 1.23  | 0.376539536 | P47802, Q9D7X8, P58281                                                                                                                                                                                                                                                                                                                                                 |                                                                                                                                |
| KEGG_PATHWAY                       | mmu04062:Chemokine signaling pathway                         | 5                                                | 2.05  | 0.384826944 | P70336, Q9Z1B3, P08556, P63001, P62881                                                                                                                                                                                                                                                                                                                                 |                                                                                                                                |
| SP_PIR_KEYWORDS                    | nad                                                          | 4                                                | 1.64  | 0.399892697 | Q8BWF0, P19096, O88712, P03893                                                                                                                                                                                                                                                                                                                                         |                                                                                                                                |
| COG_ONTOLOGY                       | Posttranslational modification, protein turnover, chaperones | 3                                                | 1.23  | 0.402334583 | P54775, Q8CGY8, Q9D832                                                                                                                                                                                                                                                                                                                                                 |                                                                                                                                |
| UP_SEQ_FEATURE                     | mutagenesis site                                             | 13                                               | 5.33  | 0.413104523 | Q9EQQ9, Q66GT5, P63001, Q03173, Q9CR95, Q9QWY8, Q80ZJ1, Q0GNC1, Q8BRT1, O70161, Q7SIG6, Q9QUH0, Q9JI46                                                                                                                                                                                                                                                                 |                                                                                                                                |
| GOTERM_MF_FAT                      | GO:0016790-thiolester hydrolase activity                     | 3                                                | 1.23  | 0.417389461 | P35123, P19096, Q8BY87                                                                                                                                                                                                                                                                                                                                                 |                                                                                                                                |
| GOTERM_BP_FAT                      | GO:0000226-microtubule cytoskeleton organization             | 3                                                | 1.23  | 0.44226486  | P54227, P19246, Q3UU96                                                                                                                                                                                                                                                                                                                                                 |                                                                                                                                |
| KEGG_PATHWAY                       | mmu04510:Focal adhesion                                      | 5                                                | 2.05  | 0.447499497 | P70336, P02468, P63001, O70161, Q9DBR7                                                                                                                                                                                                                                                                                                                                 |                                                                                                                                |
| GOTERM_BP_FAT                      | GO:0009628-response to abiotic stimulus                      | 5                                                | 2.05  | 0.449606509 | Q07076, P08556, P63001, P62627, Q7TSC1                                                                                                                                                                                                                                                                                                                                 |                                                                                                                                |
| GOTERM_CC_FAT                      | GO:0030425-dendrite                                          | 3                                                | 1.23  | 0.457337075 | Q60865, P84086, P58281                                                                                                                                                                                                                                                                                                                                                 |                                                                                                                                |
| KEGG_PATHWAY                       | mmu05200:Pathways in cancer                                  | 7                                                | 2.87  | 0.487131671 | P08556, P02468, P63001, O88712, Q8K3H0, Q61301, P61148                                                                                                                                                                                                                                                                                                                 |                                                                                                                                |

|                        |                 |                                                              |                                   |      |             |                                                                                                                                                         |
|------------------------|-----------------|--------------------------------------------------------------|-----------------------------------|------|-------------|---------------------------------------------------------------------------------------------------------------------------------------------------------|
| ion transport/channels | GOTERM_CC_FAT   | GO:0030141-secretory granule                                 | 3                                 | 1.23 | 0.489460587 | Q9CZD3, P17047, P84091                                                                                                                                  |
|                        | SP_PIR_KEYWORDS | oxidoreductase                                               | 9                                 | 3.69 | 0.509657342 | P54071, Q60597, Q00612, Q8BWF0, P19096, Q9D051, O88712, Q9CY27, P03893                                                                                  |
|                        | UP_SEQ_FEATURE  | compositionally biased region:Ser-rich                       | 7                                 | 2.87 | 0.511196675 | Q8BWBQ6, Q3UU96, Q8BRT1, Q68FD9, O08788, Q9DBR7, Q5SXY1                                                                                                 |
|                        | GOTERM_MF_FAT   | GO:0008509-anion transmembrane transporter activity          | 3                                 | 1.23 | 0.513022236 | Q8JZR6, Q8BTY2, P63080                                                                                                                                  |
| nucleus                | SP_PIR_KEYWORDS | growth factor                                                | 3                                 | 1.23 | 0.513457241 | Q9CQI3, P06745, P61148                                                                                                                                  |
|                        | UP_SEQ_FEATURE  | compositionally biased region:Glu-rich                       | 5                                 | 2.05 | 0.514781207 | Q8CGF7, Q8C0L0, Q3UH68, Q6Y7W8, P23116                                                                                                                  |
|                        | GOTERM_CC_FAT   | GO:0005938-cell cortex                                       | 3                                 | 1.23 | 0.528979072 | Q9QYB5, Q8CHH9, Q8BRT1                                                                                                                                  |
|                        | UP_SEQ_FEATURE  | compositionally biased region:Gly-rich                       | 4                                 | 1.64 | 0.543138083 | Q8K394, Q99020, Q3U0V1, Q9Z130                                                                                                                          |
|                        | SP_PIR_KEYWORDS | chromosomal protein                                          | 3                                 | 1.23 | 0.550314142 | P10922, O54962, Q60668                                                                                                                                  |
|                        | GOTERM_BP_FAT   | GO:0022613-ribonucleoprotein complex biogenesis              | 3                                 | 1.23 | 0.553350511 | Q91YE6, P23116, Q923D5                                                                                                                                  |
|                        | GOTERM_MF_FAT   | GO:0008083-growth factor activity                            | 3                                 | 1.23 | 0.55685083  | Q9CQI3, P06745, P61148                                                                                                                                  |
| signaling              | UP_SEQ_FEATURE  | region of interest:Substrate binding                         | 3                                 | 1.23 | 0.568038478 | Q9CZD3, P54071, Q05920                                                                                                                                  |
|                        | GOTERM_BP_FAT   | GO:0016053-organic acid biosynthetic process                 | 3                                 | 1.23 | 0.569009457 | Q8VCT3, P05201, P19096                                                                                                                                  |
|                        | GOTERM_BP_FAT   | GO:0046394-carboxylic acid biosynthetic process              | 3                                 | 1.23 | 0.569009457 | Q8VCT3, P05201, P19096                                                                                                                                  |
|                        | SP_PIR_KEYWORDS | nadp                                                         | 3                                 | 1.23 | 0.573777955 | P54071, Q00612, P19096                                                                                                                                  |
|                        | GOTERM_CC_FAT   | GO:0000139-Golgi membrane                                    | 3                                 | 1.23 | 0.574406681 | O08585, O35609, Q9JKD3                                                                                                                                  |
|                        | GOTERM_BP_FAT   | GO:0009100-glycoprotein metabolic process                    | 3                                 | 1.23 | 0.591751391 | Q811D0, Q8BHN3, Q8CGY8                                                                                                                                  |
|                        | GOTERM_BP_FAT   | GO:0010608-posttranscriptional regulation of gene expression | 3                                 | 1.23 | 0.595454268 | P28271, Q91YE6, Q60668                                                                                                                                  |
|                        | SP_PIR_KEYWORDS | transferase                                                  | 19                                | 7.79 | 0.602085869 | Q9EQQ9, P70336, P05201, Q9D7X8, Q9CPU4, Q9WVLO, Q3UU96, Q5F2E8, Q9CQW1, Q91V92, Q8CGY8, Q64737, Q99L43, Q5XIV6, P52196, Q9ESW4, P19096, O70161, Q9CZU6  |
|                        | KEGG_PATHWAY    | mmu04670:Leukocyte transendothelial migration                | 3                                 | 1.23 | 0.613488863 | P70336, P63001, Q61301                                                                                                                                  |
|                        | signaling       | GOTERM_BP_FAT                                                | GO:0007243-protein kinase cascade | 4    | 1.64        | 0.619411372                                                                                                                                             |
| SP_PIR_KEYWORDS        |                 | Acyltransferase                                              | 3                                 | 1.23 | 0.621525861 | Q9EQQ9, Q9D7X8, P19096                                                                                                                                  |
| UP_SEQ_FEATURE         |                 | compositionally biased region:Poly-Gly                       | 4                                 | 1.64 | 0.623738071 | Q9ERG2, Q80Y14, Q8BWR2, Q7TSC1                                                                                                                          |
| GOTERM_MF_FAT          |                 | GO:0050662-coenzyme binding                                  | 3                                 | 1.23 | 0.625811989 | P54071, Q60597, O88712                                                                                                                                  |
| GOTERM_CC_FAT          |                 | GO:0044432-endoplasmic reticulum part                        | 4                                 | 1.64 | 0.631083397 | Q811D0, Q9Z2I2, Q9JKR6, Q8BHN3                                                                                                                          |
| KEGG_PATHWAY           |                 | mmu03040:Spliceosome                                         | 3                                 | 1.23 | 0.636026032 | Q8CGF7, Q923D5, P59708                                                                                                                                  |
| GOTERM_BP_FAT          |                 | GO:0015674-di-, tri-valent inorganic cation transport        | 3                                 | 1.23 | 0.641318887 | Q9Z2I2, P54285, Q9CY27                                                                                                                                  |
| GOTERM_BP_FAT          |                 | GO:0060341-regulation of cellular localization               | 3                                 | 1.23 | 0.641318887 | Q9Z2I2, Q9JKD3, Q9DBR7                                                                                                                                  |
| immune                 | GOTERM_BP_FAT   | GO:0001775-cell activation                                   | 4                                 | 1.64 | 0.647357067 | Q811D0, Q9Z2I2, P84086, Q7TSC1                                                                                                                          |
|                        | GOTERM_BP_FAT   | GO:0031399-regulation of protein modification process        | 3                                 | 1.23 | 0.65458728  | P12367, Q9D1C8, P61148                                                                                                                                  |
| signaling              | GOTERM_BP_FAT   | GO:0009967-positive regulation of signal transduction        | 3                                 | 1.23 | 0.676866341 | P08556, Q9JKK7, Q7TSC1                                                                                                                                  |
|                        | KEGG_PATHWAY    | mmu04530:Tight junction                                      | 3                                 | 1.23 | 0.682010992 | Q9Z2H5, P08556, Q61301                                                                                                                                  |
|                        | KEGG_PATHWAY    | mmu04910:Insulin signaling pathway                           | 3                                 | 1.23 | 0.693710343 | P12367, P08556, P19096                                                                                                                                  |
|                        | GOTERM_CC_FAT   | GO:0005911-cell-cell junction                                | 3                                 | 1.23 | 0.700421149 | Q811D0, Q9QYB5, Q61301                                                                                                                                  |
|                        | GOTERM_BP_FAT   | GO:0006631-fatty acid metabolic process                      | 3                                 | 1.23 | 0.712338079 | Q8VCT3, Q8BWF0, P19096                                                                                                                                  |
|                        | GOTERM_BP_FAT   | GO:0010647-positive regulation of cell communication         | 3                                 | 1.23 | 0.726133733 | P08556, Q9JKK7, Q7TSC1                                                                                                                                  |
|                        | UP_SEQ_FEATURE  | active site:Nucleophile                                      | 3                                 | 1.23 | 0.726415548 | P97493, Q8BHN3, Q8BWF0                                                                                                                                  |
| immune                 | GOTERM_BP_FAT   | GO:0032268-regulation of cellular protein metabolic process  | 4                                 | 1.64 | 0.731353665 | P12367, Q9D1C8, P28271, P61148                                                                                                                          |
|                        | SP_PIR_KEYWORDS | hydrolase                                                    | 19                                | 7.79 | 0.73350952  | Q9CQ60, Q9EQQ9, Q8VCT3, Q11011, Q8BIW1, P39054, Q66GT5, P56382, Q8CDG3, Q9EPW0, Q8BY87, P35123, Q8BVBQ5, Q9Z1B3, P56375, Q8BHN3, P19096, O88851, Q9J146 |
|                        | GOTERM_CC_FAT   | GO:0048471-perinuclear region of cytoplasm                   | 3                                 | 1.23 | 0.745727642 | Q7TMB8, Q58A65, Q6NVE8                                                                                                                                  |
|                        | UP_SEQ_FEATURE  | compositionally biased region:Poly-Pro                       | 5                                 | 2.05 | 0.753381991 | Q8CGF7, Q80X50, Q80TR1, Q4ACU6, Q7TSC1                                                                                                                  |
|                        | GOTERM_BP_FAT   | GO:0002684-positive regulation of immune system process      | 3                                 | 1.23 | 0.768930396 | O54774, P54285, P98086                                                                                                                                  |
|                        | GOTERM_CC_FAT   | GO:0005694-chromosome                                        | 5                                 | 2.05 | 0.779741338 | Q9QYB5, P10922, O54962, Q8BRT1, Q60668                                                                                                                  |
|                        | GOTERM_BP_FAT   | GO:0045321-leukocyte activation                              | 3                                 | 1.23 | 0.797638108 | Q811D0, Q9Z2I2, P84086                                                                                                                                  |
|                        | GOTERM_MF_FAT   | GO:0016791-phosphatase activity                              | 3                                 | 1.23 | 0.82458255  | Q66GT5, Q9EPW0, Q9DBR7                                                                                                                                  |
|                        | GOTERM_MF_FAT   | GO:0008289-lipid binding                                     | 4                                 | 1.64 | 0.836749665 | P70336, Q07076, P84091, Q3UU96                                                                                                                          |

|            |                 |                                                                   |    |       |             |                                                                                                                                                                                                                                                                                                                                                                        |
|------------|-----------------|-------------------------------------------------------------------|----|-------|-------------|------------------------------------------------------------------------------------------------------------------------------------------------------------------------------------------------------------------------------------------------------------------------------------------------------------------------------------------------------------------------|
| cell cycle | SP_PIR_KEYWORDS | cell cycle                                                        | 5  | 2.05  | 0.85692979  | Q9DB27, Q640R3, Q8BRT1, Q8K3H0, P84089                                                                                                                                                                                                                                                                                                                                 |
|            | SP_PIR_KEYWORDS | nucleus                                                           | 45 | 18.44 | 0.896252453 | Q8CGF7, Q9EQQ9, Q11011, P21619, Q8VBV7, Q8QZZ7, O54962, Q62446, Q8BKC5, P23116, Q8CGY8, Q6PDI5, Q7TSC1, Q8CCN5, P14206, Q923D5, Q60668, P59708, P35123, Q9D8T7, P61458, Q8K310, Q9Z130, Q9JKL4, Q8K3H0, Q5SXY1, Q99020, P48722, Q8BIW1, P10922, Q91WV0, Q9CQZ1, Q91YE6, O88712, Q3UHD9, Q9ERS2, P54775, Q60902, Q3U0V1, Q4KMM3, Q9ERU9, O88851, Q61699, Q64152, Q9CXW3 |
|            | GOTERM_BP_FAT   | GO:0008284-positive regulation of cell proliferation              | 3  | 1.23  | 0.898758    | Q811D0, P08556, P61148                                                                                                                                                                                                                                                                                                                                                 |
|            | SP_PIR_KEYWORDS | magnesium                                                         | 4  | 1.64  | 0.911808249 | P54071, P70336, Q91V92, Q9JI46                                                                                                                                                                                                                                                                                                                                         |
|            | UP_SEQ_FEATURE  | compositionally biased region:Poly-Ala                            | 3  | 1.23  | 0.921525471 | Q99020, Q80Y14, Q4ACU6                                                                                                                                                                                                                                                                                                                                                 |
|            | GOTERM_BP_FAT   | GO:0043009-chordate embryonic development                         | 4  | 1.64  | 0.926079213 | Q811D0, P54775, Q03173, Q64152                                                                                                                                                                                                                                                                                                                                         |
|            | GOTERM_BP_FAT   | GO:0009792-embryonic development ending in birth or egg hatching  | 4  | 1.64  | 0.928949694 | Q811D0, P54775, Q03173, Q64152                                                                                                                                                                                                                                                                                                                                         |
|            | GOTERM_MF_FAT   | GO:0005506-iron ion binding                                       | 3  | 1.23  | 0.943113942 | Q9CPW2, P28271, Q9CY27                                                                                                                                                                                                                                                                                                                                                 |
|            | GOTERM_MF_FAT   | GO:0000287-magnesium ion binding                                  | 3  | 1.23  | 0.973100318 | P54071, Q91V92, Q9JI46                                                                                                                                                                                                                                                                                                                                                 |
|            | GOTERM_BP_FAT   | GO:0033554-cellular response to stress                            | 3  | 1.23  | 0.974302391 | Q9DB27, Q8K2C9, Q8BGQ7                                                                                                                                                                                                                                                                                                                                                 |
|            | UP_SEQ_FEATURE  | sequence variant                                                  | 3  | 1.23  | 0.975116407 | Q8CGF7, Q9Z1B3, Q80X50                                                                                                                                                                                                                                                                                                                                                 |
|            | GOTERM_BP_FAT   | GO:0042127-regulation of cell proliferation                       | 4  | 1.64  | 0.977945123 | Q811D0, P08556, P61148, Q7TSC1                                                                                                                                                                                                                                                                                                                                         |
|            | UP_SEQ_FEATURE  | compositionally biased region:Poly-Ser                            | 3  | 1.23  | 0.980147716 | Q3UVX5, Q9ERU9, Q3TES0                                                                                                                                                                                                                                                                                                                                                 |
|            | UP_SEQ_FEATURE  | topological domain:Luminal                                        | 3  | 1.23  | 0.987598222 | P17047, P61620, Q8BI08                                                                                                                                                                                                                                                                                                                                                 |
| immune     | GOTERM_BP_FAT   | GO:0010033-response to organic substance                          | 3  | 1.23  | 0.992394697 | P48722, Q9Z2I2, Q8BGQ7                                                                                                                                                                                                                                                                                                                                                 |
|            | GOTERM_MF_FAT   | GO:0043565-sequence-specific DNA binding                          | 3  | 1.23  | 0.99530688  | Q99020, Q91WV0, Q60668                                                                                                                                                                                                                                                                                                                                                 |
| immune     | INTERPRO        | IPR013783:Immunoglobulin-like fold                                | 3  | 1.23  | 0.998231362 | P10922, Q640R3, Q61330                                                                                                                                                                                                                                                                                                                                                 |
|            | GOTERM_BP_FAT   | GO:0010604-positive regulation of macromolecule metabolic process | 3  | 1.23  | 0.998467768 | Q99020, P61458, P61148                                                                                                                                                                                                                                                                                                                                                 |
|            | SP_PIR_KEYWORDS | transducer                                                        | 5  | 2.05  | 0.999998179 | Q8K394, Q9Z1B3, Q80TR1, Q3UVX5, P62881                                                                                                                                                                                                                                                                                                                                 |
|            | UP_SEQ_FEATURE  | topological domain:Cytoplasmic                                    | 17 | 6.97  | 0.99999809  | Q8JZR6, P97441, Q640R3, Q3UVX5, O35609, Q8R5J9, Q8BTY2, Q80UG2, Q9JKD3, Q8BY89, P61620, Q8BI08, Q62277, Q80TR1, P17047, P63080, Q7TQ95                                                                                                                                                                                                                                 |
|            | GOTERM_BP_FAT   | GO:0007186-G-protein coupled receptor protein signaling pathway   | 6  | 2.46  | 0.999999954 | Q80TR1, Q3UVX5, Q9ESW4, P63080, Q8R4H2, P62881                                                                                                                                                                                                                                                                                                                         |
|            | UP_SEQ_FEATURE  | topological domain:Extracellular                                  | 10 | 4.10  | 0.999999957 | Q8JZR6, Q80TR1, Q640R3, Q3UVX5, Q8BTY2, P63080, Q80UG2, Q9JKD3, Q8BY89, Q7TQ95                                                                                                                                                                                                                                                                                         |
|            | GOTERM_BP_FAT   | GO:0007166-cell surface receptor linked signal transduction       | 8  | 3.28  | 1           | Q80TR1, Q3UVX5, P54285, Q9ESW4, P63080, Q8R4H2, P62881, P61148                                                                                                                                                                                                                                                                                                         |
|            | SP_PIR_KEYWORDS | receptor                                                          | 6  | 2.46  | 1           | Q80TR1, Q60902, Q3UVX5, P63080, Q80UG2, P14206                                                                                                                                                                                                                                                                                                                         |
