# Supplementary material
Source: PubMed Central journal article supplement (PMC4832927)
Supplement: NIHMS776226-supplement-5.pdf [file NIHMS776226-supplement-5.pdf]

| Category | Annotation Cluster 1<br>Category | Enrichment Score: 13.714996894919818<br>Term | Count | %     | PValue      | Probes                                                                                                                                                                                                                                                                                                                                                                                                                                                                                                                                                                                                                                                                             |
|----------|----------------------------------|----------------------------------------------|-------|-------|-------------|------------------------------------------------------------------------------------------------------------------------------------------------------------------------------------------------------------------------------------------------------------------------------------------------------------------------------------------------------------------------------------------------------------------------------------------------------------------------------------------------------------------------------------------------------------------------------------------------------------------------------------------------------------------------------------|
|          | SP_PIR_KEYWORDS                  | disulfide bond                               | 40    | 58.82 | 5.57E-16    | 1448148_AT, 1419298_AT, 1420394_S_AT, 1437726_X_AT, 1455965_AT, 1436996_X_AT, 1419455_AT, 1435903_AT, 1423547_AT, 1451784_X_AT, 1448380_AT, 1449195_S_AT, 1451161_A_AT, 1417963_AT, 1418021_AT, 1425545_X_AT, 1421812_AT, 1451941_A_AT, 1417868_A_AT, 1455332_X_AT, 1460248_AT, 1451683_X_AT, 1424067_AT, 1419315_AT, 1422875_AT, 1419483_AT, 1419132_AT, 1419482_AT, 1417870_X_AT, 1452014_A_AT, 1426808_AT, 1456567_X_AT, 1427301_AT, 1419128_AT, 1448591_AT, 1420699_AT, 1448710_AT, 1428018_A_AT, 1421792_S_AT, 1449401_AT, 1435477_S_AT, 1449156_AT, 1419202_AT, 1418910_AT, 1439426_X_AT, 1416340_A_AT, 1419561_AT, 1449164_AT, 1434366_X_AT                                 |
|          | UP_SEQ_FEATURE                   | disulfide bond                               | 39    | 57.35 | 1.85E-15    | 1451683_X_AT, 1419298_AT, 1424067_AT, 1420394_S_AT, 1419315_AT, 1437726_X_AT, 1422875_AT, 1436996_X_AT, 1455965_AT, 1419483_AT, 1419132_AT, 1419482_AT, 1419455_AT, 1417870_X_AT, 1452014_A_AT, 1426808_AT, 1435903_AT, 1427301_AT, 1419128_AT, 1423547_AT, 1451784_X_AT, 1448380_AT, 1448591_AT, 1448710_AT, 1420699_AT, 1449401_AT, 1428018_A_AT, 1449195_S_AT, 1421792_S_AT, 1435477_S_AT, 1451161_A_AT, 1418910_AT, 1417963_AT, 1419202_AT, 1449156_AT, 1439426_X_AT, 1425545_X_AT, 1418021_AT, 1421812_AT, 1451941_A_AT, 1416340_A_AT, 1417868_A_AT, 1455332_X_AT, 1449164_AT, 1419561_AT, 1460248_AT                                                                         |
|          | SP_PIR_KEYWORDS                  | signal                                       | 42    | 61.76 | 3.69E-15    | 1448148_AT, 1419298_AT, 1420394_S_AT, 1437726_X_AT, 1427076_AT, 1455965_AT, 1436996_X_AT, 1419455_AT, 1435903_AT, 1448891_AT, 1423547_AT, 1451784_X_AT, 1419064_A_AT, 1448380_AT, 1449195_S_AT, 1451161_A_AT, 1417963_AT, 1418021_AT, 1425545_X_AT, 1421812_AT, 1451941_A_AT, 1417868_A_AT, 1455332_X_AT, 1418028_AT, 1460248_AT, 1451683_X_AT, 1424067_AT, 1419315_AT, 1422875_AT, 1419132_AT, 1417870_X_AT, 1452014_A_AT, 1456567_X_AT, 1427301_AT, 1419128_AT, 1419100_AT, 1448591_AT, 1428018_A_AT, 1421792_S_AT, 1449401_AT, 1435477_S_AT, 1449156_AT, 1419202_AT, 1418910_AT, 1439426_X_AT, 1416340_A_AT, 1448303_AT, 1434366_X_AT, 1419561_AT, 1449164_AT                   |
|          | UP_SEQ_FEATURE                   | signal peptide                               | 42    | 61.76 | 7.97E-15    | 1448148_AT, 1419298_AT, 1420394_S_AT, 1437726_X_AT, 1427076_AT, 1455965_AT, 1436996_X_AT, 1419455_AT, 1435903_AT, 1448891_AT, 1423547_AT, 1451784_X_AT, 1419064_A_AT, 1448380_AT, 1449195_S_AT, 1451161_A_AT, 1417963_AT, 1418021_AT, 1425545_X_AT, 1421812_AT, 1451941_A_AT, 1417868_A_AT, 1455332_X_AT, 1418028_AT, 1460248_AT, 1451683_X_AT, 1424067_AT, 1419315_AT, 1422875_AT, 1419132_AT, 1417870_X_AT, 1452014_A_AT, 1456567_X_AT, 1427301_AT, 1419128_AT, 1419100_AT, 1448591_AT, 1428018_A_AT, 1421792_S_AT, 1449401_AT, 1435477_S_AT, 1449156_AT, 1419202_AT, 1418910_AT, 1439426_X_AT, 1416340_A_AT, 1448303_AT, 1434366_X_AT, 1419561_AT, 1449164_AT                   |
|          | SP_PIR_KEYWORDS                  | glycoprotein                                 | 43    | 63.24 | 3.34E-13    | 1448148_AT, 1419298_AT, 1420394_S_AT, 1437726_X_AT, 1427076_AT, 1455965_AT, 1419455_AT, 1427221_AT, 1435903_AT, 1451784_X_AT, 1419064_A_AT, 1448380_AT, 1449195_S_AT, 1448640_AT, 1451161_A_AT, 1417963_AT, 1418021_AT, 1425545_X_AT, 1421812_AT, 1451941_A_AT, 1417868_A_AT, 1455332_X_AT, 1418028_AT, 1460248_AT, 1451683_X_AT, 1424067_AT, 1419315_AT, 1422875_AT, 1420361_AT, 1419483_AT, 1419132_AT, 1419482_AT, 1417870_X_AT, 1456567_X_AT, 1427301_AT, 1448606_AT, 1419128_AT, 1419100_AT, 1448591_AT, 1420699_AT, 1448710_AT, 1428018_A_AT, 1421792_S_AT, 1435477_S_AT, 1449156_AT, 1419202_AT, 1418910_AT, 1428114_AT, 1416340_A_AT, 1448303_AT, 1434366_X_AT, 1449164_AT |
|          | UP_SEQ_FEATURE                   | glycosylation site:N-linked (GlcNAc...)      | 41    | 60.29 | 5.07E-12    | 1448148_AT, 1419298_AT, 1420394_S_AT, 1427076_AT, 1455965_AT, 1419455_AT, 1427221_AT, 1435903_AT, 1451784_X_AT, 1419064_A_AT, 1448380_AT, 1448640_AT, 1451161_A_AT, 1417963_AT, 1418021_AT, 1425545_X_AT, 1421812_AT, 1451941_A_AT, 1417868_A_AT, 1455332_X_AT, 1418028_AT, 1460248_AT, 1451683_X_AT, 1424067_AT, 1419315_AT, 1422875_AT, 1420361_AT, 1419483_AT, 1419132_AT, 1419482_AT, 1417870_X_AT, 1456567_X_AT, 1427301_AT, 1448606_AT, 1419128_AT, 1419100_AT, 1448591_AT, 1420699_AT, 1448710_AT, 1428018_A_AT, 1421792_S_AT, 1435477_S_AT, 1449156_AT, 1419202_AT, 1418910_AT, 1428114_AT, 1416340_A_AT, 1448303_AT, 1449164_AT                                           |
|          | Annotation Cluster 2<br>Category | Enrichment Score: 4.658720772381782<br>Term  | Count | %     | PValue      | Genes                                                                                                                                                                                                                                                                                                                                                                                                                                                                                                                                                                                                                                                                              |
| immune   | INTERPRO                         | IPR003599:Immunoglobulin subtype             | 11    | 16.18 | 6.62E-08    | 1424067_AT, 1419315_AT, 1422875_AT, 1428018_A_AT, 1421792_S_AT, 1435477_S_AT, 1449156_AT, 1421812_AT, 1451941_A_AT, 1455332_X_AT, 1435903_AT, 1427301_AT, 1448891_AT                                                                                                                                                                                                                                                                                                                                                                                                                                                                                                               |
| immune   | SP_PIR_KEYWORDS                  | Immunoglobulin domain                        | 12    | 17.65 | 1.36E-07    | 1420394_S_AT, 1424067_AT, 1419315_AT, 1422875_AT, 1421792_S_AT, 1428018_A_AT, 1435477_S_AT, 1449156_AT, 1421812_AT, 1451941_A_AT, 1455332_X_AT, 1435903_AT, 1427301_AT, 1448891_AT                                                                                                                                                                                                                                                                                                                                                                                                                                                                                                 |
| immune   | SMART                            | SM00409:IG                                   | 11    | 16.18 | 1.67E-07    | 1424067_AT, 1419315_AT, 1422875_AT, 1428018_A_AT, 1421792_S_AT, 1435477_S_AT, 1449156_AT, 1421812_AT, 1451941_A_AT, 1455332_X_AT, 1435903_AT, 1427301_AT, 1448891_AT                                                                                                                                                                                                                                                                                                                                                                                                                                                                                                               |
| immune   | INTERPRO                         | IPR007110:Immunoglobulin-like                | 12    | 17.65 | 4.91E-07    | 1451683_X_AT, 1451784_X_AT, 1424067_AT, 1420394_S_AT, 1419315_AT, 1422875_AT, 1428018_A_AT, 1435477_S_AT, 1449156_AT, 1425545_X_AT, 1421812_AT, 1451941_A_AT, 1455332_X_AT, 1435903_AT, 1427301_AT, 1448891_AT                                                                                                                                                                                                                                                                                                                                                                                                                                                                     |
| immune   | INTERPRO                         | IPR013783:Immunoglobulin-like fold           | 10    | 14.71 | 5.71E-05    | 1451683_X_AT, 1451784_X_AT, 1420394_S_AT, 1424067_AT, 1421792_S_AT, 1428018_A_AT, 1435477_S_AT, 1425545_X_AT, 1421812_AT, 1451941_A_AT, 1455332_X_AT, 1435903_AT, 1427301_AT, 1448891_AT                                                                                                                                                                                                                                                                                                                                                                                                                                                                                           |
| immune   | INTERPRO                         | IPR013106:Immunoglobulin V-set               | 6     | 8.82  | 9.05E-04    | 1419315_AT, 1421792_S_AT, 1428018_A_AT, 1435903_AT, 1427301_AT, 1449156_AT                                                                                                                                                                                                                                                                                                                                                                                                                                                                                                                                                                                                         |
| immune   | UP_SEQ_FEATURE                   | domain:Ig-like C2-type 1                     | 5     | 7.35  | 0.002402145 | 1424067_AT, 1420394_S_AT, 1451941_A_AT, 1455332_X_AT, 1435477_S_AT, 1427301_AT, 1449156_AT                                                                                                                                                                                                                                                                                                                                                                                                                                                                                                                                                                                         |
| immune   | UP_SEQ_FEATURE                   | domain:Ig-like C2-type 2                     | 5     | 7.35  | 0.002402145 | 1424067_AT, 1420394_S_AT, 1451941_A_AT, 1455332_X_AT, 1435477_S_AT, 1427301_AT, 1449156_AT                                                                                                                                                                                                                                                                                                                                                                                                                                                                                                                                                                                         |
| immune   | INTERPRO                         | IPR013151:Immunoglobulin                     | 5     | 7.35  | 0.005368799 | 1424067_AT, 1420394_S_AT, 1451941_A_AT, 1455332_X_AT, 1435477_S_AT, 1427301_AT, 1448891_AT                                                                                                                                                                                                                                                                                                                                                                                                                                                                                                                                                                                         |
|          | Annotation Cluster 3<br>Category | Enrichment Score: 4.38133131814222<br>Term   | Count | %     | PValue      | Genes                                                                                                                                                                                                                                                                                                                                                                                                                                                                                                                                                                                                                                                                              |

|                 |                                                   |                                                                             |             |             |                                                                                                                                                                                                                                                                                                                                                                                                                                                                                                                                                                                            |                                                                                                                                                                                                                                                                             |
|-----------------|---------------------------------------------------|-----------------------------------------------------------------------------|-------------|-------------|--------------------------------------------------------------------------------------------------------------------------------------------------------------------------------------------------------------------------------------------------------------------------------------------------------------------------------------------------------------------------------------------------------------------------------------------------------------------------------------------------------------------------------------------------------------------------------------------|-----------------------------------------------------------------------------------------------------------------------------------------------------------------------------------------------------------------------------------------------------------------------------|
| UP_SEQ_FEATURE  | topological domain:Extracellular                  | 26                                                                          | 38.24       | 2.92E-07    | 1451683_X_AT, 1420394_S_AT, 1424067_AT, 1419315_AT, 1422875_AT, 1420361_AT, 1427076_AT, 1419483_AT, 1419132_AT, 1419482_AT, 1419599_S_AT, 1419455_AT, 1419598_AT, 1427221_AT, 1435903_AT, 1448606_AT, 1419128_AT, 1451784_X_AT, 1448710_AT, 1420699_AT, 1428018_A_AT, 1449195_S_AT, 1421792_S_AT, 1435477_S_AT, 1451161_A_AT, 1449156_AT, 1425545_X_AT, 1418826_AT, 1451941_A_AT, 1455332_X_AT, 1448303_AT, 1449164_AT                                                                                                                                                                     |                                                                                                                                                                                                                                                                             |
| UP_SEQ_FEATURE  | topological domain:Cytoplasmic                    | 29                                                                          | 42.65       | 1.29E-06    | 1451683_X_AT, 1424067_AT, 1420394_S_AT, 1419315_AT, 1422875_AT, 1420361_AT, 1427076_AT, 1419483_AT, 1438910_A_AT, 1419132_AT, 1419482_AT, 1419599_S_AT, 1419455_AT, 1419598_AT, 1427221_AT, 1435903_AT, 1448606_AT, 1419128_AT, 1451784_X_AT, 1419064_A_AT, 1448710_AT, 1420699_AT, 1421792_S_AT, 1451161_A_AT, 1449156_AT, 1425545_X_AT, 1421812_AT, 1418826_AT, 1451941_A_AT, 1455332_X_AT, 1418028_AT, 1448303_AT, 1449164_AT                                                                                                                                                           |                                                                                                                                                                                                                                                                             |
| SP_PIR_KEYWORDS | transmembrane                                     | 35                                                                          | 51.47       | 3.82E-06    | 1426025_S_AT, 1451683_X_AT, 1424067_AT, 1420394_S_AT, 1419315_AT, 1422875_AT, 1425025_AT, 1420361_AT, 1437540_AT, 1427076_AT, 1419483_AT, 1418808_AT, 1438910_A_AT, 1419132_AT, 1419482_AT, 1419599_S_AT, 1419455_AT, 1419598_AT, 1427221_AT, 1435903_AT, 1448606_AT, 1419128_AT, 1451784_X_AT, 1419064_A_AT, 1448710_AT, 1420699_AT, 1421792_S_AT, 1428018_A_AT, 1449195_S_AT, 1435477_S_AT, 1448640_AT, 1451161_A_AT, 1449156_AT, 1425545_X_AT, 1421812_AT, 1418826_AT, 1451941_A_AT, 1428114_AT, 1455332_X_AT, 1418028_AT, 1448303_AT, 1449164_AT                                       |                                                                                                                                                                                                                                                                             |
| UP_SEQ_FEATURE  | transmembrane region                              | 34                                                                          | 50.00       | 7.17E-06    | 1426025_S_AT, 1451683_X_AT, 1424067_AT, 1420394_S_AT, 1419315_AT, 1422875_AT, 1425025_AT, 1420361_AT, 1437540_AT, 1427076_AT, 1419483_AT, 1438910_A_AT, 1419132_AT, 1419482_AT, 1419599_S_AT, 1419455_AT, 1419598_AT, 1427221_AT, 1435903_AT, 1448606_AT, 1419128_AT, 1451784_X_AT, 1419064_A_AT, 1448710_AT, 1420699_AT, 1421792_S_AT, 1428018_A_AT, 1449195_S_AT, 1435477_S_AT, 1448640_AT, 1451161_A_AT, 1449156_AT, 1425545_X_AT, 1421812_AT, 1418826_AT, 1451941_A_AT, 1428114_AT, 1455332_X_AT, 1418028_AT, 1448303_AT, 1449164_AT                                                   |                                                                                                                                                                                                                                                                             |
| SP_PIR_KEYWORDS | membrane                                          | 38                                                                          | 55.88       | 1.15E-04    | 1454268_A_AT, 1426025_S_AT, 1451683_X_AT, 1424067_AT, 1420394_S_AT, 1419315_AT, 1418825_AT, 1422875_AT, 1425025_AT, 1420361_AT, 1437540_AT, 1427076_AT, 1419483_AT, 1438910_A_AT, 1419132_AT, 1419482_AT, 1419599_S_AT, 1419455_AT, 1419598_AT, 1427221_AT, 1416612_AT, 1435903_AT, 1427301_AT, 1448606_AT, 1419128_AT, 1451784_X_AT, 1419064_A_AT, 1448710_AT, 1420699_AT, 1421792_S_AT, 1449195_S_AT, 1428018_A_AT, 1435477_S_AT, 1448640_AT, 1451161_A_AT, 1449156_AT, 1425545_X_AT, 1418826_AT, 1421812_AT, 1451941_A_AT, 1428114_AT, 1455332_X_AT, 1418028_AT, 1448303_AT, 1449164_AT |                                                                                                                                                                                                                                                                             |
| GOTERM_CC_FAT   | GO:0016021-integral to membrane                   | 36                                                                          | 52.94       | 8.97E-04    | 1426025_S_AT, 1451683_X_AT, 1424067_AT, 1420394_S_AT, 1419315_AT, 1422875_AT, 1425025_AT, 1420361_AT, 1437540_AT, 1427076_AT, 1419483_AT, 1418808_AT, 1438910_A_AT, 1419132_AT, 1419482_AT, 1419599_S_AT, 1419455_AT, 1419598_AT, 1427221_AT, 1435903_AT, 1448606_AT, 1419128_AT, 1451784_X_AT, 1419064_A_AT, 1448710_AT, 1420699_AT, 1421792_S_AT, 1428018_A_AT, 1449195_S_AT, 1435477_S_AT, 1448640_AT, 1451161_A_AT, 1424754_AT, 1449156_AT, 1425545_X_AT, 1421812_AT, 1418826_AT, 1451941_A_AT, 1428114_AT, 1455332_X_AT, 1418028_AT, 1448303_AT, 1449164_AT                           |                                                                                                                                                                                                                                                                             |
| GOTERM_CC_FAT   | GO:0031224-intrinsic to membrane                  | 37                                                                          | 54.41       | 0.001060222 | 1426025_S_AT, 1451683_X_AT, 1424067_AT, 1420394_S_AT, 1419315_AT, 1422875_AT, 1425025_AT, 1420361_AT, 1437540_AT, 1427076_AT, 1419483_AT, 1418808_AT, 1438910_A_AT, 1419132_AT, 1419482_AT, 1419599_S_AT, 1419455_AT, 1419598_AT, 1427221_AT, 1435903_AT, 1427301_AT, 1448606_AT, 1419128_AT, 1451784_X_AT, 1419064_A_AT, 1448710_AT, 1420699_AT, 1421792_S_AT, 1428018_A_AT, 1449195_S_AT, 1435477_S_AT, 1448640_AT, 1451161_A_AT, 1424754_AT, 1449156_AT, 1425545_X_AT, 1421812_AT, 1418826_AT, 1451941_A_AT, 1428114_AT, 1455332_X_AT, 1418028_AT, 1448303_AT, 1449164_AT               |                                                                                                                                                                                                                                                                             |
| GOTERM_CC_FAT   | GO:0005886-plasma membrane                        | 25                                                                          | 36.76       | 0.007853312 | 1426025_S_AT, 1451683_X_AT, 1420394_S_AT, 1424067_AT, 1418825_AT, 1422875_AT, 1437540_AT, 1419483_AT, 1438910_A_AT, 1419132_AT, 1419482_AT, 1427221_AT, 1435903_AT, 1427301_AT, 1448606_AT, 1419128_AT, 1451784_X_AT, 1419064_A_AT, 1448710_AT, 1420699_AT, 1421223_A_AT, 1428018_A_AT, 1421792_S_AT, 1435477_S_AT, 1451161_A_AT, 1425545_X_AT, 1421812_AT, 1451941_A_AT, 1455332_X_AT, 1448303_AT, 1449164_AT                                                                                                                                                                             |                                                                                                                                                                                                                                                                             |
| immune          | Annotation Cluster 4<br>Category<br>GOTERM_BP_FAT | Enrichment Score: 2.8902508251328323<br>Term<br>GO:0006952-defense response | Count<br>14 | %<br>20.59  | PValue<br>2.78E-08                                                                                                                                                                                                                                                                                                                                                                                                                                                                                                                                                                         | Genes<br>1451683_X_AT, 1451784_X_AT, 1419100_AT, 1418825_AT, 1437726_X_AT, 1420361_AT, 1420699_AT, 1449401_AT, 1435477_S_AT, 1436996_X_AT, 1419132_AT, 1439426_X_AT, 1425545_X_AT, 1418021_AT, 1421812_AT, 1451941_A_AT, 1455332_X_AT, 1434366_X_AT, 1419561_AT, 1423547_AT |
| immune          | SP_PIR_KEYWORDS                                   | immune response                                                             | 10          | 14.71       | 7.23E-08                                                                                                                                                                                                                                                                                                                                                                                                                                                                                                                                                                                   | 1451683_X_AT, 1451784_X_AT, 1420394_S_AT, 1418825_AT, 1437726_X_AT, 1420699_AT, 1449401_AT, 1428018_A_AT, 1419132_AT, 1418021_AT, 1425545_X_AT, 1435903_AT, 1434366_X_AT                                                                                                    |
| immune          | GOTERM_BP_FAT                                     | GO:0006955-immune response                                                  | 14          | 20.59       | 8.55E-08                                                                                                                                                                                                                                                                                                                                                                                                                                                                                                                                                                                   | 1451683_X_AT, 1451784_X_AT, 1424067_AT, 1420394_S_AT, 1418825_AT, 1437726_X_AT, 1420361_AT, 1420699_AT, 1449401_AT, 1428018_A_AT, 1435477_S_AT, 1419132_AT, 1425545_X_AT, 1418021_AT, 1451941_A_AT, 1455332_X_AT, 1434366_X_AT, 1419561_AT, 1435903_AT                      |
| immune          | GOTERM_BP_FAT                                     | GO:0045087-innate immune response                                           | 7           | 10.29       | 7.95E-06                                                                                                                                                                                                                                                                                                                                                                                                                                                                                                                                                                                   | 1418021_AT, 1418825_AT, 1437726_X_AT, 1420361_AT, 1420699_AT, 1449401_AT, 1434366_X_AT, 1419132_AT                                                                                                                                                                          |
| immune          | SP_PIR_KEYWORDS                                   | innate immunity                                                             | 6           | 8.82        | 1.93E-05                                                                                                                                                                                                                                                                                                                                                                                                                                                                                                                                                                                   | 1418021_AT, 1418825_AT, 1437726_X_AT, 1420699_AT, 1449401_AT, 1434366_X_AT, 1419132_AT                                                                                                                                                                                      |
| immune          | GOTERM_BP_FAT                                     | GO:0002449-lymphocyte mediated immunity                                     | 6           | 8.82        | 2.83E-05                                                                                                                                                                                                                                                                                                                                                                                                                                                                                                                                                                                   | 1418021_AT, 1424067_AT, 1451941_A_AT, 1437726_X_AT, 1420361_AT, 1455332_X_AT, 1449401_AT, 1434366_X_AT, 1435477_S_AT                                                                                                                                                        |
| immune          | GOTERM_BP_FAT                                     | GO:0002250-adaptive immune response                                         | 6           | 8.82        | 4.65E-05                                                                                                                                                                                                                                                                                                                                                                                                                                                                                                                                                                                   | 1418021_AT, 1424067_AT, 1451941_A_AT, 1437726_X_AT, 1420361_AT, 1455332_X_AT, 1449401_AT, 1434366_X_AT, 1435477_S_AT                                                                                                                                                        |

|        |                               |                                                                                                                                      |       |       |             |                                                                                                                                                                                                                                            |
|--------|-------------------------------|--------------------------------------------------------------------------------------------------------------------------------------|-------|-------|-------------|--------------------------------------------------------------------------------------------------------------------------------------------------------------------------------------------------------------------------------------------|
| immune | GOTERM_BP_FAT                 | GO:0002460-adaptive immune response based on somatic recombination of immune receptors built from immunoglobulin superfamily domains | 6     | 8.82  | 4.65E-05    | 1418021_AT, 1424067_AT, 1451941_A_AT, 1437726_X_AT, 1420361_AT, 1455332_X_AT, 1449401_AT, 1434366_X_AT, 1435477_S_AT                                                                                                                       |
| immune | GOTERM_BP_FAT                 | GO:0002443-leukocyte mediated immunity                                                                                               | 6     | 8.82  | 6.04E-05    | 1418021_AT, 1424067_AT, 1451941_A_AT, 1437726_X_AT, 1420361_AT, 1455332_X_AT, 1449401_AT, 1434366_X_AT, 1435477_S_AT                                                                                                                       |
| immune | GOTERM_BP_FAT                 | GO:0006954-inflammatory response                                                                                                     | 8     | 11.76 | 9.41E-05    | 1418021_AT, 1419100_AT, 1437726_X_AT, 1420361_AT, 1420699_AT, 1449401_AT, 1434366_X_AT, 1419561_AT, 1419132_AT                                                                                                                             |
| immune | GOTERM_BP_FAT                 | GO:0019882-antigen processing and presentation                                                                                       | 5     | 7.35  | 2.54E-04    | 1425545_X_AT, 1451683_X_AT, 1451784_X_AT, 1421812_AT, 1424067_AT, 1451941_A_AT, 1420361_AT, 1455332_X_AT, 1435477_S_AT                                                                                                                     |
| immune | GOTERM_BP_FAT                 | GO:0002252-immune effector process                                                                                                   | 6     | 8.82  | 3.19E-04    | 1418021_AT, 1424067_AT, 1451941_A_AT, 1437726_X_AT, 1420361_AT, 1455332_X_AT, 1449401_AT, 1434366_X_AT, 1435477_S_AT                                                                                                                       |
| immune | GOTERM_BP_FAT                 | GO:0050778-positive regulation of immune response                                                                                    | 6     | 8.82  | 3.62E-04    | 1418021_AT, 1437726_X_AT, 1420361_AT, 1420699_AT, 1449401_AT, 1434366_X_AT, 1419132_AT                                                                                                                                                     |
| immune | GOTERM_BP_FAT                 | GO:0002253-activation of immune response                                                                                             | 5     | 7.35  | 5.36E-04    | 1418021_AT, 1437726_X_AT, 1420699_AT, 1449401_AT, 1434366_X_AT, 1419132_AT                                                                                                                                                                 |
| immune | GOTERM_BP_FAT                 | GO:0009611-response to wounding                                                                                                      | 8     | 11.76 | 0.001378617 | 1418021_AT, 1419100_AT, 1437726_X_AT, 1420361_AT, 1420699_AT, 1449401_AT, 1434366_X_AT, 1419561_AT, 1419132_AT                                                                                                                             |
| immune | GOTERM_BP_FAT                 | GO:0048584-positive regulation of response to stimulus                                                                               | 6     | 8.82  | 0.00154885  | 1418021_AT, 1437726_X_AT, 1420361_AT, 1420699_AT, 1449401_AT, 1434366_X_AT, 1419132_AT                                                                                                                                                     |
| immune | GOTERM_BP_FAT                 | GO:0002684-positive regulation of immune system process                                                                              | 6     | 8.82  | 0.002788943 | 1418021_AT, 1437726_X_AT, 1420361_AT, 1420699_AT, 1449401_AT, 1434366_X_AT, 1419132_AT                                                                                                                                                     |
| immune | GOTERM_BP_FAT                 | GO:0016064-immunoglobulin mediated immune response                                                                                   | 4     | 5.88  | 0.003139579 | 1418021_AT, 1451941_A_AT, 1437726_X_AT, 1455332_X_AT, 1449401_AT, 1434366_X_AT, 1435477_S_AT                                                                                                                                               |
| immune | GOTERM_BP_FAT                 | GO:0019724-B cell mediated immunity                                                                                                  | 4     | 5.88  | 0.003488663 | 1418021_AT, 1451941_A_AT, 1437726_X_AT, 1455332_X_AT, 1449401_AT, 1434366_X_AT, 1435477_S_AT                                                                                                                                               |
| immune | SP_PIR_KEYWORDS               | inflammatory response                                                                                                                | 4     | 5.88  | 0.005771685 | 1418021_AT, 1420699_AT, 1419561_AT, 1419132_AT                                                                                                                                                                                             |
| immune | GOTERM_BP_FAT                 | GO:0002526-acute inflammatory response                                                                                               | 4     | 5.88  | 0.006865313 | 1418021_AT, 1419100_AT, 1437726_X_AT, 1449401_AT, 1434366_X_AT                                                                                                                                                                             |
| immune | SP_PIR_KEYWORDS               | complement pathway                                                                                                                   | 3     | 4.41  | 0.006870333 | 1418021_AT, 1437726_X_AT, 1449401_AT, 1434366_X_AT                                                                                                                                                                                         |
| immune | GOTERM_BP_FAT                 | GO:0006958-complement activation, classical pathway                                                                                  | 3     | 4.41  | 0.007768512 | 1418021_AT, 1437726_X_AT, 1449401_AT, 1434366_X_AT                                                                                                                                                                                         |
| immune | GOTERM_BP_FAT                 | GO:0002455-humoral immune response mediated by circulating immunoglobulin                                                            | 3     | 4.41  | 0.010489602 | 1418021_AT, 1437726_X_AT, 1449401_AT, 1434366_X_AT                                                                                                                                                                                         |
| immune | GOTERM_BP_FAT                 | GO:0002541-activation of plasma proteins involved in acute inflammatory response                                                     | 3     | 4.41  | 0.010489602 | 1418021_AT, 1437726_X_AT, 1449401_AT, 1434366_X_AT                                                                                                                                                                                         |
| immune | GOTERM_BP_FAT                 | GO:0006956-complement activation                                                                                                     | 3     | 4.41  | 0.010489602 | 1418021_AT, 1437726_X_AT, 1449401_AT, 1434366_X_AT                                                                                                                                                                                         |
| immune | KEGG_PATHWAY                  | mmu05322:Systemic lupus erythematosus                                                                                                | 4     | 5.88  | 0.011408844 | 1418021_AT, 1451941_A_AT, 1437726_X_AT, 1455332_X_AT, 1449401_AT, 1434366_X_AT, 1435477_S_AT                                                                                                                                               |
| immune | KEGG_PATHWAY                  | mmu04610:Complement and coagulation cascades                                                                                         | 4     | 5.88  | 0.011878829 | 1418021_AT, 1419482_AT, 1437726_X_AT, 1449401_AT, 1434366_X_AT, 1419483_AT                                                                                                                                                                 |
| immune | GOTERM_BP_FAT                 | GO:0010033-response to organic substance                                                                                             | 7     | 10.29 | 0.016092162 | 1419100_AT, 1420361_AT, 1420699_AT, 1422660_AT, 1416612_AT, 1427301_AT, 1419132_AT                                                                                                                                                         |
| immune | GOTERM_BP_FAT                 | GO:0006959-humoral immune response                                                                                                   | 3     | 4.41  | 0.023764772 | 1418021_AT, 1437726_X_AT, 1449401_AT, 1434366_X_AT                                                                                                                                                                                         |
| immune | GOTERM_BP_FAT                 | GO:0001819-positive regulation of cytokine production                                                                                | 3     | 4.41  | 0.028051453 | 1420361_AT, 1420699_AT, 1419132_AT                                                                                                                                                                                                         |
| immune | GOTERM_BP_FAT                 | GO:0051605-protein maturation by peptide bond cleavage                                                                               | 3     | 4.41  | 0.035012467 | 1418021_AT, 1437726_X_AT, 1449401_AT, 1434366_X_AT                                                                                                                                                                                         |
| immune | GOTERM_BP_FAT                 | GO:0016485-protein processing                                                                                                        | 3     | 4.41  | 0.062264083 | 1418021_AT, 1437726_X_AT, 1449401_AT, 1434366_X_AT                                                                                                                                                                                         |
| immune | GOTERM_BP_FAT                 | GO:0051604-protein maturation                                                                                                        | 3     | 4.41  | 0.068366612 | 1418021_AT, 1437726_X_AT, 1449401_AT, 1434366_X_AT                                                                                                                                                                                         |
| immune | GOTERM_BP_FAT                 | GO:0001817-regulation of cytokine production                                                                                         | 3     | 4.41  | 0.136242797 | 1420361_AT, 1420699_AT, 1419132_AT                                                                                                                                                                                                         |
| immune | GOTERM_BP_FAT                 | GO:0051240-positive regulation of multicellular organismal process                                                                   | 3     | 4.41  | 0.171199099 | 1420361_AT, 1420699_AT, 1419132_AT                                                                                                                                                                                                         |
|        | GOTERM_BP_FAT                 | GO:0006508-proteolysis                                                                                                               | 7     | 10.29 | 0.263621423 | 1418021_AT, 1417870_X_AT, 1437726_X_AT, 1417868_A_AT, 1448591_AT, 1449401_AT, 1434366_X_AT, 1455965_AT, 1460248_AT                                                                                                                         |
|        | UP_SEQ_FEATURE                | mutagenesis site                                                                                                                     | 5     | 7.35  | 0.483181551 | 1418825_AT, 1420699_AT, 1428018_A_AT, 1435903_AT, 1419132_AT                                                                                                                                                                               |
|        | Annotation Cluster 5 Category | Enrichment Score: 2.7407592738577513                                                                                                 |       |       |             |                                                                                                                                                                                                                                            |
|        | GOTERM_CC_FAT                 | GO:0009897-external side of plasma membrane                                                                                          | Count | %     | PValue      | Genes                                                                                                                                                                                                                                      |
|        | GOTERM_CC_FAT                 | GO:0009986-cell surface                                                                                                              | 8     | 11.76 | 1.87E-04    | 1425545_X_AT, 1451683_X_AT, 1451784_X_AT, 1424067_AT, 1451941_A_AT, 1455332_X_AT, 1420699_AT, 1435477_S_AT, 1427301_AT, 1451161_A_AT, 1419128_AT, 1419132_AT                                                                               |
|        | GOTERM_CC_FAT                 | GO:0044459-plasma membrane part                                                                                                      | 9     | 13.24 | 3.35E-04    | 1451683_X_AT, 1451784_X_AT, 1424067_AT, 1420361_AT, 1420699_AT, 1435477_S_AT, 1451161_A_AT, 1419132_AT, 1425545_X_AT, 1451941_A_AT, 1455332_X_AT, 1427301_AT, 1419128_AT                                                                   |
|        | GOTERM_CC_FAT                 | GO:0009897-external side of plasma membrane                                                                                          | 14    | 20.59 | 0.095714156 | 1426025_S_AT, 1451683_X_AT, 1451784_X_AT, 1424067_AT, 1420699_AT, 1421223_A_AT, 1435477_S_AT, 1451161_A_AT, 1438910_A_AT, 1419132_AT, 1425545_X_AT, 1421812_AT, 1451941_A_AT, 1455332_X_AT, 1427221_AT, 1448303_AT, 1427301_AT, 1419128_AT |
|        | Annotation Cluster 6          | Enrichment Score: 2.5795838206287387                                                                                                 |       |       |             |                                                                                                                                                                                                                                            |

| Category              | Term                                                   | Count                                     | %     | PValue      | Genes                                                                                                                                                                                                                                                                                          |                                                                                                                                                                                          |
|-----------------------|--------------------------------------------------------|-------------------------------------------|-------|-------------|------------------------------------------------------------------------------------------------------------------------------------------------------------------------------------------------------------------------------------------------------------------------------------------------|------------------------------------------------------------------------------------------------------------------------------------------------------------------------------------------|
| KEGG_PATHWAY          | mmu04142:Lysosome                                      | 6                                         | 8.82  | 7.46E-04    | 1426025_S_AT, 1417870_X_AT, 1416340_A_AT, 1417868_A_AT, 1420361_AT, 1448591_AT, 1449164_AT                                                                                                                                                                                                     |                                                                                                                                                                                          |
| GOTERM_CC_FAT         | GO:0005773-vacuole                                     | 7                                         | 10.29 | 0.001574594 | 1426025_S_AT, 1417870_X_AT, 1416340_A_AT, 1418825_AT, 1417868_A_AT, 1420361_AT, 1448591_AT, 1449164_AT                                                                                                                                                                                         |                                                                                                                                                                                          |
| SP_PIR_KEYWORDS       | Lysosome                                               | 5                                         | 7.35  | 0.004755445 | 1426025_S_AT, 1417870_X_AT, 1416340_A_AT, 1417868_A_AT, 1448591_AT, 1449164_AT                                                                                                                                                                                                                 |                                                                                                                                                                                          |
| GOTERM_CC_FAT         | GO:0005764-lysosome                                    | 6                                         | 8.82  | 0.004759808 | 1426025_S_AT, 1417870_X_AT, 1416340_A_AT, 1417868_A_AT, 1420361_AT, 1448591_AT, 1449164_AT                                                                                                                                                                                                     |                                                                                                                                                                                          |
| GOTERM_CC_FAT         | GO:000323-lytic vacuole                                | 6                                         | 8.82  | 0.004759808 | 1426025_S_AT, 1417870_X_AT, 1416340_A_AT, 1417868_A_AT, 1420361_AT, 1448591_AT, 1449164_AT                                                                                                                                                                                                     |                                                                                                                                                                                          |
| Annotation Cluster 7  |                                                        |                                           |       |             |                                                                                                                                                                                                                                                                                                |                                                                                                                                                                                          |
| Category              | Term                                                   | Count                                     | %     | PValue      | Genes                                                                                                                                                                                                                                                                                          |                                                                                                                                                                                          |
| GOTERM_BP_FAT         | GO:0050829-defense response to Gram-negative bacterium | 3                                         | 4.41  | 8.34E-04    | 1420361_AT, 1436996_X_AT, 1423547_AT, 1439426_X_AT                                                                                                                                                                                                                                             |                                                                                                                                                                                          |
| GOTERM_BP_FAT         | GO:0050830-defense response to Gram-positive bacterium | 3                                         | 4.41  | 0.004899368 | 1436996_X_AT, 1423547_AT, 1419132_AT, 1439426_X_AT                                                                                                                                                                                                                                             |                                                                                                                                                                                          |
| GOTERM_BP_FAT         | GO:0042742-defense response to bacterium               | 4                                         | 5.88  | 0.005586037 | 1420361_AT, 1436996_X_AT, 1423547_AT, 1419132_AT, 1439426_X_AT                                                                                                                                                                                                                                 |                                                                                                                                                                                          |
| GOTERM_BP_FAT         | GO:0009617-response to bacterium                       | 4                                         | 5.88  | 0.022631172 | 1420361_AT, 1436996_X_AT, 1423547_AT, 1419132_AT, 1439426_X_AT                                                                                                                                                                                                                                 |                                                                                                                                                                                          |
| Annotation Cluster 8  |                                                        |                                           |       |             |                                                                                                                                                                                                                                                                                                |                                                                                                                                                                                          |
| Category              | Term                                                   | Count                                     | %     | PValue      | Genes                                                                                                                                                                                                                                                                                          |                                                                                                                                                                                          |
| SP_PIR_KEYWORDS       | Secreted                                               | 16                                        | 23.53 | 6.04E-04    | 1448148_AT, 1419298_AT, 1419100_AT, 1437726_X_AT, 1448380_AT, 1421792_S_AT, 1449401_AT, 1435477_S_AT, 1455965_AT, 1418910_AT, 1417963_AT, 1419202_AT, 1418021_AT, 1451941_A_AT, 1452014_A_AT, 1455332_X_AT, 1434366_X_AT, 1419561_AT, 1456567_X_AT, 1460248_AT                                 |                                                                                                                                                                                          |
| GOTERM_CC_FAT         | GO:0005576-extracellular region                        | 18                                        | 26.47 | 0.005096219 | 1448148_AT, 1419298_AT, 1419100_AT, 1437726_X_AT, 1448380_AT, 1421792_S_AT, 1449195_S_AT, 1449401_AT, 1435477_S_AT, 1455965_AT, 1418910_AT, 1417963_AT, 1419202_AT, 1418021_AT, 1451941_A_AT, 1452014_A_AT, 1455332_X_AT, 1434366_X_AT, 1419561_AT, 1456567_X_AT, 1460248_AT                   |                                                                                                                                                                                          |
| GOTERM_CC_FAT         | GO:0044421-extracellular region part                   | 11                                        | 16.18 | 0.012600953 | 1418021_AT, 1448148_AT, 1419298_AT, 1452014_A_AT, 1448380_AT, 1449195_S_AT, 1426808_AT, 1419561_AT, 1456567_X_AT, 1455965_AT, 1460248_AT, 1418910_AT                                                                                                                                           |                                                                                                                                                                                          |
| immune                | GOTERM_CC_FAT                                          | GO:0005615-extracellular space            | 8     | 11.76       | 0.029046853                                                                                                                                                                                                                                                                                    | 1418021_AT, 1448148_AT, 1419298_AT, 1452014_A_AT, 1449195_S_AT, 1419561_AT, 1456567_X_AT, 1460248_AT, 1418910_AT                                                                         |
| Annotation Cluster 9  |                                                        |                                           |       |             |                                                                                                                                                                                                                                                                                                |                                                                                                                                                                                          |
| Category              | Term                                                   | Count                                     | %     | PValue      | Genes                                                                                                                                                                                                                                                                                          |                                                                                                                                                                                          |
| immune                | INTERPRO                                               | IPR013783:Immunoglobulin-like fold        | 10    | 14.71       | 5.71E-05                                                                                                                                                                                                                                                                                       | 1451683_X_AT, 1451784_X_AT, 1420394_S_AT, 1424067_AT, 1421792_S_AT, 1428018_A_AT, 1435477_S_AT, 1425545_X_AT, 1421812_AT, 1451941_A_AT, 1455332_X_AT, 1435903_AT, 1427301_AT, 1448891_AT |
| SP_PIR_KEYWORDS       | cell membrane                                          | 17                                        | 25.00 | 7.40E-04    | 1451683_X_AT, 1451784_X_AT, 1420394_S_AT, 1418825_AT, 1422875_AT, 1448710_AT, 1421792_S_AT, 1428018_A_AT, 1435477_S_AT, 1419483_AT, 1451161_A_AT, 1438910_A_AT, 1419132_AT, 1425545_X_AT, 1419482_AT, 1451941_A_AT, 1455332_X_AT, 1427221_AT, 1435903_AT, 1449164_AT, 1427301_AT, 1448606_AT   |                                                                                                                                                                                          |
| SP_PIR_KEYWORDS       | alternative splicing                                   | 17                                        | 25.00 | 0.698753839 | 1454268_A_AT, 1451683_X_AT, 1451784_X_AT, 1420394_S_AT, 1424067_AT, 1418825_AT, 1422875_AT, 1448710_AT, 1421792_S_AT, 1428018_A_AT, 1435477_S_AT, 1425545_X_AT, 1426509_S_AT, 1426508_AT, 1421812_AT, 1451941_A_AT, 1436890_AT, 1452014_A_AT, 1455332_X_AT, 1435903_AT, 1449164_AT, 1448606_AT |                                                                                                                                                                                          |
| UP_SEQ_FEATURE        | splice variant                                         | 17                                        | 25.00 | 0.722999178 | 1454268_A_AT, 1451683_X_AT, 1451784_X_AT, 1420394_S_AT, 1424067_AT, 1418825_AT, 1422875_AT, 1448710_AT, 1421792_S_AT, 1428018_A_AT, 1435477_S_AT, 1425545_X_AT, 1426509_S_AT, 1426508_AT, 1421812_AT, 1451941_A_AT, 1436890_AT, 1452014_A_AT, 1455332_X_AT, 1435903_AT, 1449164_AT, 1448606_AT |                                                                                                                                                                                          |
| Annotation Cluster 10 |                                                        |                                           |       |             |                                                                                                                                                                                                                                                                                                |                                                                                                                                                                                          |
| Category              | Term                                                   | Count                                     | %     | PValue      | Genes                                                                                                                                                                                                                                                                                          |                                                                                                                                                                                          |
| GOTERM_BP_FAT         | GO:0007155-cell adhesion                               | 8                                         | 11.76 | 0.011406839 | 1424067_AT, 1422875_AT, 1448380_AT, 1420699_AT, 1448303_AT, 1460248_AT, 1419128_AT, 1449156_AT                                                                                                                                                                                                 |                                                                                                                                                                                          |
| GOTERM_BP_FAT         | GO:0022610-biological adhesion                         | 8                                         | 11.76 | 0.011538761 | 1424067_AT, 1422875_AT, 1448380_AT, 1420699_AT, 1448303_AT, 1460248_AT, 1419128_AT, 1449156_AT                                                                                                                                                                                                 |                                                                                                                                                                                          |
| SP_PIR_KEYWORDS       | cell adhesion                                          | 5                                         | 7.35  | 0.076887856 | 1424067_AT, 1422875_AT, 1448380_AT, 1419128_AT, 1449156_AT                                                                                                                                                                                                                                     |                                                                                                                                                                                          |
| Annotation Cluster 11 |                                                        |                                           |       |             |                                                                                                                                                                                                                                                                                                |                                                                                                                                                                                          |
| Category              | Term                                                   | Count                                     | %     | PValue      | Genes                                                                                                                                                                                                                                                                                          |                                                                                                                                                                                          |
| immune                | GOTERM_BP_FAT                                          | GO:0042098-T cell proliferation           | 3     | 4.41        | 0.009083018                                                                                                                                                                                                                                                                                    | 1420361_AT, 1448710_AT, 1419128_AT                                                                                                                                                       |
| immune                | GOTERM_BP_FAT                                          | GO:0046651-lymphocyte proliferation       | 3     | 4.41        | 0.017902453                                                                                                                                                                                                                                                                                    | 1420361_AT, 1448710_AT, 1419128_AT                                                                                                                                                       |
| immune                | GOTERM_BP_FAT                                          | GO:0032943-mononuclear cell proliferation | 3     | 4.41        | 0.018830422                                                                                                                                                                                                                                                                                    | 1420361_AT, 1448710_AT, 1419128_AT                                                                                                                                                       |
| immune                | GOTERM_BP_FAT                                          | GO:0070661-leukocyte proliferation        | 3     | 4.41        | 0.018830422                                                                                                                                                                                                                                                                                    | 1420361_AT, 1448710_AT, 1419128_AT                                                                                                                                                       |
| immune                | GOTERM_BP_FAT                                          | GO:0045321-leukocyte activation           | 5     | 7.35        | 0.019305064                                                                                                                                                                                                                                                                                    | 1451941_A_AT, 1420361_AT, 1455332_X_AT, 1448710_AT, 1435477_S_AT, 1427301_AT, 1419128_AT                                                                                                 |
| immune                | GOTERM_BP_FAT                                          | GO:0042110-T cell activation              | 4     | 5.88        | 0.0200143                                                                                                                                                                                                                                                                                      | 1420361_AT, 1448710_AT, 1427301_AT, 1419128_AT                                                                                                                                           |
| immune                | GOTERM_BP_FAT                                          | GO:0001775-cell activation                | 5     | 7.35        | 0.029086386                                                                                                                                                                                                                                                                                    | 1451941_A_AT, 1420361_AT, 1455332_X_AT, 1448710_AT, 1435477_S_AT, 1427301_AT, 1419128_AT                                                                                                 |
| immune                | GOTERM_BP_FAT                                          | GO:0046649-lymphocyte activation          | 4     | 5.88        | 0.060262652                                                                                                                                                                                                                                                                                    | 1420361_AT, 1448710_AT, 1427301_AT, 1419128_AT                                                                                                                                           |
| immune                | GOTERM_BP_FAT                                          | GO:0008283-cell proliferation             | 3     | 4.41        | 0.357941461                                                                                                                                                                                                                                                                                    | 1420361_AT, 1448710_AT, 1419128_AT                                                                                                                                                       |
| Annotation Cluster 12 |                                                        |                                           |       |             |                                                                                                                                                                                                                                                                                                |                                                                                                                                                                                          |
| Category              | Term                                                   | Count                                     | %     | PValue      | Genes                                                                                                                                                                                                                                                                                          |                                                                                                                                                                                          |
|                       | Enrichment Score: 1.52574686796283                     |                                           |       |             |                                                                                                                                                                                                                                                                                                |                                                                                                                                                                                          |

|                               | Category              | Term                                                              | Count | %     | PValue      | Genes                                                                                                                                                                                                                                      |
|-------------------------------|-----------------------|-------------------------------------------------------------------|-------|-------|-------------|--------------------------------------------------------------------------------------------------------------------------------------------------------------------------------------------------------------------------------------------|
|                               | GOTERM_MF_FAT         | GO:0004866-endopeptidase inhibitor activity                       | 4     | 5.88  | 0.019097955 | 1418021_AT, 1419100_AT, 1452352_AT, 1419202_AT                                                                                                                                                                                             |
|                               | GOTERM_MF_FAT         | GO:0030414-peptidase inhibitor activity                           | 4     | 5.88  | 0.022548735 | 1418021_AT, 1419100_AT, 1452352_AT, 1419202_AT                                                                                                                                                                                             |
|                               | GOTERM_MF_FAT         | GO:0004857-enzyme inhibitor activity                              | 4     | 5.88  | 0.061468178 | 1418021_AT, 1419100_AT, 1452352_AT, 1419202_AT                                                                                                                                                                                             |
|                               | Annotation Cluster 13 | Enrichment Score: 1.3607610489878275                              |       |       |             |                                                                                                                                                                                                                                            |
|                               | Category              | Term                                                              | Count | %     | PValue      | Genes                                                                                                                                                                                                                                      |
| immune                        | GOTERM_CC_FAT         | GO:0005615-extracellular space                                    | 8     | 11.76 | 0.029046853 | 1418021_AT, 1448148_AT, 1419298_AT, 1452014_A_AT, 1449195_S_AT, 1419561_AT, 1456567_X_AT, 1460248_AT, 1418910_AT                                                                                                                           |
| immune                        | GOTERM_MF_FAT         | GO:0005125-cytokine activity                                      | 4     | 5.88  | 0.042370762 | 1448148_AT, 1449195_S_AT, 1419561_AT, 1456567_X_AT, 1418910_AT                                                                                                                                                                             |
| immune                        | SP_PIR_KEYWORDS       | cytokine                                                          | 4     | 5.88  | 0.043738306 | 1448148_AT, 1449195_S_AT, 1419561_AT, 1456567_X_AT, 1418910_AT                                                                                                                                                                             |
|                               | KEGG_PATHWAY          | mmu04060:Cytokine-cytokine receptor interaction                   | 5     | 7.35  | 0.06697743  | 1419455_AT, 1448710_AT, 1449195_S_AT, 1419561_AT, 1418910_AT                                                                                                                                                                               |
|                               | Annotation Cluster 14 | Enrichment Score: 1.2560398176710135                              |       |       |             |                                                                                                                                                                                                                                            |
|                               | Category              | Term                                                              | Count | %     | PValue      | Genes                                                                                                                                                                                                                                      |
| immune                        | GOTERM_BP_FAT         | GO:0050766-positive regulation of phagocytosis                    | 3     | 4.41  | 0.004399266 | 1451941_A_AT, 1420361_AT, 1455332_X_AT, 1420699_AT, 1435477_S_AT                                                                                                                                                                           |
| immune                        | GOTERM_BP_FAT         | GO:0050764-regulation of phagocytosis                             | 3     | 4.41  | 0.005424421 | 1451941_A_AT, 1420361_AT, 1455332_X_AT, 1420699_AT, 1435477_S_AT                                                                                                                                                                           |
| immune                        | GOTERM_BP_FAT         | GO:0045807-positive regulation of endocytosis                     | 3     | 4.41  | 0.009774934 | 1451941_A_AT, 1420361_AT, 1455332_X_AT, 1420699_AT, 1435477_S_AT                                                                                                                                                                           |
| immune                        | GOTERM_BP_FAT         | GO:0006909-phagocytosis                                           | 3     | 4.41  | 0.019778346 | 1451941_A_AT, 1420361_AT, 1455332_X_AT, 1420699_AT, 1435477_S_AT                                                                                                                                                                           |
| immune                        | GOTERM_BP_FAT         | GO:0030100-regulation of endocytosis                              | 3     | 4.41  | 0.020745983 | 1451941_A_AT, 1420361_AT, 1455332_X_AT, 1420699_AT, 1435477_S_AT                                                                                                                                                                           |
| immune                        | GOTERM_BP_FAT         | GO:0060627-regulation of vesicle-mediated transport               | 3     | 4.41  | 0.046555602 | 1451941_A_AT, 1420361_AT, 1455332_X_AT, 1420699_AT, 1435477_S_AT                                                                                                                                                                           |
| immune                        | GOTERM_BP_FAT         | GO:0051130-positive regulation of cellular component organization | 3     | 4.41  | 0.119462989 | 1451941_A_AT, 1420361_AT, 1455332_X_AT, 1420699_AT, 1435477_S_AT                                                                                                                                                                           |
| immune                        | GOTERM_BP_FAT         | GO:0051050-positive regulation of transport                       | 3     | 4.41  | 0.134352312 | 1451941_A_AT, 1420361_AT, 1455332_X_AT, 1420699_AT, 1435477_S_AT                                                                                                                                                                           |
| immune                        | GOTERM_BP_FAT         | GO:0006897-endocytosis                                            | 3     | 4.41  | 0.221817505 | 1451941_A_AT, 1420361_AT, 1455332_X_AT, 1420699_AT, 1435477_S_AT                                                                                                                                                                           |
| immune                        | GOTERM_BP_FAT         | GO:0010324-membrane invagination                                  | 3     | 4.41  | 0.221817505 | 1451941_A_AT, 1420361_AT, 1455332_X_AT, 1420699_AT, 1435477_S_AT                                                                                                                                                                           |
| immune                        | GOTERM_BP_FAT         | GO:0016044-membrane organization                                  | 3     | 4.41  | 0.374087963 | 1451941_A_AT, 1420361_AT, 1455332_X_AT, 1420699_AT, 1435477_S_AT                                                                                                                                                                           |
| immune                        | GOTERM_BP_FAT         | GO:0016192-vesicle-mediated transport                             | 3     | 4.41  | 0.642887442 | 1451941_A_AT, 1420361_AT, 1455332_X_AT, 1420699_AT, 1435477_S_AT                                                                                                                                                                           |
|                               | Annotation Cluster 15 | Enrichment Score: 1.221327586084469                               |       |       |             |                                                                                                                                                                                                                                            |
|                               | Category              | Term                                                              | Count | %     | PValue      | Genes                                                                                                                                                                                                                                      |
|                               | GOTERM_CC_FAT         | GO:0005887-integral to plasma membrane                            | 7     | 10.29 | 0.044611228 | 1426025_S_AT, 1421812_AT, 1451941_A_AT, 1455332_X_AT, 1427221_AT, 1448303_AT, 1435477_S_AT, 1419128_AT, 1438910_A_AT                                                                                                                       |
|                               | GOTERM_CC_FAT         | GO:0031226-intrinsic to plasma membrane                           | 7     | 10.29 | 0.050768799 | 1426025_S_AT, 1421812_AT, 1451941_A_AT, 1455332_X_AT, 1427221_AT, 1448303_AT, 1435477_S_AT, 1419128_AT, 1438910_A_AT                                                                                                                       |
|                               | GOTERM_CC_FAT         | GO:0044459-plasma membrane part                                   | 14    | 20.59 | 0.095714156 | 1426025_S_AT, 1451683_X_AT, 1451784_X_AT, 1424067_AT, 1420699_AT, 1421223_A_AT, 1435477_S_AT, 1451161_A_AT, 1438910_A_AT, 1419132_AT, 1425545_X_AT, 1421812_AT, 1451941_A_AT, 1455332_X_AT, 1427221_AT, 1448303_AT, 1427301_AT, 1419128_AT |
|                               | Annotation Cluster 16 | Enrichment Score: 1.085074596499677                               |       |       |             |                                                                                                                                                                                                                                            |
|                               | Category              | Term                                                              | Count | %     | PValue      | Genes                                                                                                                                                                                                                                      |
| extracellular matrix/adhesion | GOTERM_MF_FAT         | GO:0030246-carbohydrate binding                                   | 5     | 7.35  | 0.04388825  | 1416340_A_AT, 1420699_AT, 1448303_AT, 1426808_AT, 1418910_AT                                                                                                                                                                               |
| extracellular matrix/adhesion | GOTERM_MF_FAT         | GO:0001871-pattern binding                                        | 3     | 4.41  | 0.112515919 | 1420699_AT, 1448303_AT, 1418910_AT                                                                                                                                                                                                         |
| extracellular matrix/adhesion | GOTERM_MF_FAT         | GO:0030247-polysaccharide binding                                 | 3     | 4.41  | 0.112515919 | 1420699_AT, 1448303_AT, 1418910_AT                                                                                                                                                                                                         |
|                               | Annotation Cluster 17 | Enrichment Score: 1.0831038273109155                              |       |       |             |                                                                                                                                                                                                                                            |
|                               | Category              | Term                                                              | Count | %     | PValue      | Genes                                                                                                                                                                                                                                      |
|                               | SP_PIR_KEYWORDS       | chemotaxis                                                        | 3     | 4.41  | 0.033710359 | 1419482_AT, 1449195_S_AT, 1419561_AT, 1419483_AT                                                                                                                                                                                           |
|                               | GOTERM_BP_FAT         | GO:0042330-taxis                                                  | 3     | 4.41  | 0.101512971 | 1419482_AT, 1449195_S_AT, 1419561_AT, 1419483_AT                                                                                                                                                                                           |
|                               | GOTERM_BP_FAT         | GO:0006935-chemotaxis                                             | 3     | 4.41  | 0.101512971 | 1419482_AT, 1449195_S_AT, 1419561_AT, 1419483_AT                                                                                                                                                                                           |
|                               | GOTERM_BP_FAT         | GO:0007610-behavior                                               | 5     | 7.35  | 0.10463346  | 1419482_AT, 1416340_A_AT, 1437540_AT, 1449195_S_AT, 1419561_AT, 1419483_AT                                                                                                                                                                 |
|                               | GOTERM_BP_FAT         | GO:0007626-locomotory behavior                                    | 4     | 5.88  | 0.10568268  | 1419482_AT, 1437540_AT, 1449195_S_AT, 1419561_AT, 1419483_AT                                                                                                                                                                               |
|                               | Annotation Cluster 18 | Enrichment Score: 0.9116367543075803                              |       |       |             |                                                                                                                                                                                                                                            |
|                               | Category              | Term                                                              | Count | %     | PValue      | Genes                                                                                                                                                                                                                                      |

|                       |                                       |                                                                 |    |        |             |                                                                                                                                                                      |
|-----------------------|---------------------------------------|-----------------------------------------------------------------|----|--------|-------------|----------------------------------------------------------------------------------------------------------------------------------------------------------------------|
|                       | GOTERM_BP_FAT                         | GO:0001503-ossification                                         | 3  | 4.41   | 0.096290258 | 1452014_A_AT, 1448303_AT, 1418910_AT                                                                                                                                 |
|                       | GOTERM_BP_FAT                         | GO:0060348-bone development                                     | 3  | 4.41   | 0.113995571 | 1452014_A_AT, 1448303_AT, 1418910_AT                                                                                                                                 |
|                       | GOTERM_BP_FAT                         | GO:0001501-skeletal system development                          | 4  | 5.88   | 0.167733345 | 1452014_A_AT, 1448303_AT, 1426808_AT, 1418910_AT                                                                                                                     |
| Annotation Cluster 19 | Enrichment Score: 0.7598296521261833  |                                                                 |    |        |             |                                                                                                                                                                      |
| Category              | Term                                  | Count                                                           | %  | PValue | Genes       |                                                                                                                                                                      |
|                       | INTERPRO                              | IPR013128:Peptidase C1A, papain                                 | 3  | 4.41   | 0.008105518 | 1417870_X_AT, 1417868_A_AT, 1448591_AT, 1452352_AT                                                                                                                   |
|                       | GOTERM_MF_FAT                         | GO:0008234-cysteine-type peptidase activity                     | 3  | 4.41   | 0.115979532 | 1417870_X_AT, 1417868_A_AT, 1448591_AT, 1452352_AT                                                                                                                   |
|                       | GOTERM_MF_FAT                         | GO:0070011-peptidase activity, acting on L-amino acid peptides  | 5  | 7.35   | 0.203253743 | 1417870_X_AT, 1417868_A_AT, 1448591_AT, 1452352_AT, 1455965_AT, 1460248_AT                                                                                           |
|                       | GOTERM_MF_FAT                         | GO:0008233-peptidase activity                                   | 5  | 7.35   | 0.225789104 | 1417870_X_AT, 1417868_A_AT, 1448591_AT, 1452352_AT, 1455965_AT, 1460248_AT                                                                                           |
|                       | SP_PIR_KEYWORDS                       | zymogen                                                         | 3  | 4.41   | 0.234813039 | 1417870_X_AT, 1417868_A_AT, 1448591_AT, 1455965_AT                                                                                                                   |
|                       | GOTERM_BP_FAT                         | GO:0006508-proteolysis                                          | 7  | 10.29  | 0.263621423 | 1418021_AT, 1417870_X_AT, 1437726_X_AT, 1417868_A_AT, 1448591_AT, 1449401_AT, 1434366_X_AT, 1455965_AT, 1460248_AT                                                   |
|                       | GOTERM_MF_FAT                         | GO:0004175-endorpeptidase activity                              | 3  | 4.41   | 0.495330504 | 1417870_X_AT, 1417868_A_AT, 1448591_AT, 1455965_AT                                                                                                                   |
|                       | SP_PIR_KEYWORDS                       | Protease                                                        | 3  | 4.41   | 0.63075561  | 1417870_X_AT, 1417868_A_AT, 1448591_AT, 1455965_AT                                                                                                                   |
| Annotation Cluster 20 | Enrichment Score: 0.7438319563573289  |                                                                 |    |        |             |                                                                                                                                                                      |
| Category              | Term                                  | Count                                                           | %  | PValue | Genes       |                                                                                                                                                                      |
|                       | GOTERM_BP_FAT                         | GO:0048754-branching morphogenesis of a tube                    | 3  | 4.41   | 0.089454797 | 1452014_A_AT, 1448710_AT, 1418910_AT                                                                                                                                 |
|                       | GOTERM_BP_FAT                         | GO:0001763-morphogenesis of a branching structure               | 3  | 4.41   | 0.140041933 | 1452014_A_AT, 1448710_AT, 1418910_AT                                                                                                                                 |
|                       | GOTERM_BP_FAT                         | GO:0035239-tube morphogenesis                                   | 3  | 4.41   | 0.2177101   | 1452014_A_AT, 1448710_AT, 1418910_AT                                                                                                                                 |
|                       | GOTERM_BP_FAT                         | GO:0035295-tube development                                     | 3  | 4.41   | 0.388089477 | 1452014_A_AT, 1448710_AT, 1418910_AT                                                                                                                                 |
| Annotation Cluster 21 | Enrichment Score: 0.7186851822773435  |                                                                 |    |        |             |                                                                                                                                                                      |
| Category              | Term                                  | Count                                                           | %  | PValue | Genes       |                                                                                                                                                                      |
|                       | GOTERM_CC_FAT                         | GO:0048770-pigment granule                                      | 3  | 4.41   | 0.114055629 | 1418028_AT, 1448303_AT, 1438910_A_AT                                                                                                                                 |
|                       | GOTERM_CC_FAT                         | GO:0042470-melanosome                                           | 3  | 4.41   | 0.114055629 | 1418028_AT, 1448303_AT, 1438910_A_AT                                                                                                                                 |
|                       | GOTERM_CC_FAT                         | GO:0031410-cytoplasmic vesicle                                  | 6  | 8.82   | 0.196237639 | 1418825_AT, 1420361_AT, 1418028_AT, 1448303_AT, 1438910_A_AT, 1419132_AT                                                                                             |
|                       | GOTERM_CC_FAT                         | GO:0031982-vesicle                                              | 6  | 8.82   | 0.207515257 | 1418825_AT, 1420361_AT, 1418028_AT, 1448303_AT, 1438910_A_AT, 1419132_AT                                                                                             |
|                       | GOTERM_CC_FAT                         | GO:0016023-cytoplasmic membrane-bounded vesicle                 | 5  | 7.35   | 0.246291067 | 1418825_AT, 1420361_AT, 1418028_AT, 1448303_AT, 1438910_A_AT                                                                                                         |
|                       | GOTERM_CC_FAT                         | GO:0031988-membrane-bounded vesicle                             | 5  | 7.35   | 0.255620839 | 1418825_AT, 1420361_AT, 1418028_AT, 1448303_AT, 1438910_A_AT                                                                                                         |
|                       | SP_PIR_KEYWORDS                       | cytoplasmic vesicle                                             | 3  | 4.41   | 0.279314203 | 1418825_AT, 1448303_AT, 1419132_AT                                                                                                                                   |
| Annotation Cluster 22 | Enrichment Score: 0.5211078231034835  |                                                                 |    |        |             |                                                                                                                                                                      |
| Category              | Term                                  | Count                                                           | %  | PValue | Genes       |                                                                                                                                                                      |
|                       | GOTERM_BP_FAT                         | GO:0007166-cell surface receptor linked signal transduction     | 10 | 14.71  | 0.098498028 | 1420699_AT, 1448710_AT, 1435477_S_AT, 1419483_AT, 1451161_A_AT, 1418910_AT, 1419132_AT, 1419482_AT, 1451941_A_AT, 1452014_A_AT, 1455332_X_AT, 1448606_AT, 1419128_AT |
| immune                | SP_PIR_KEYWORDS                       | g-protein coupled receptor                                      | 4  | 5.88   | 0.226962037 | 1419482_AT, 1448710_AT, 1448606_AT, 1451161_A_AT, 1419483_AT                                                                                                         |
| immune                | SP_PIR_KEYWORDS                       | transducer                                                      | 4  | 5.88   | 0.291676056 | 1419482_AT, 1448710_AT, 1448606_AT, 1451161_A_AT, 1419483_AT                                                                                                         |
| immune                | PIR_SUPERFAMILY                       | PIRSF800006:rhodopsin-like G protein-coupled receptors          | 3  | 4.41   | 0.414730487 | 1419482_AT, 1448710_AT, 1448606_AT, 1419483_AT                                                                                                                       |
| immune                | INTERPRO                              | IPR000276:7TM GPCR, rhodopsin-like                              | 3  | 4.41   | 0.415416875 | 1419482_AT, 1448710_AT, 1448606_AT, 1419483_AT                                                                                                                       |
| immune                | INTERPRO                              | IPR017452:GPCR, rhodopsin-like superfamily                      | 3  | 4.41   | 0.427257576 | 1419482_AT, 1448710_AT, 1448606_AT, 1419483_AT                                                                                                                       |
| immune                | GOTERM_BP_FAT                         | GO:0007186-G-protein coupled receptor protein signaling pathway | 4  | 5.88   | 0.468839111 | 1419482_AT, 1448710_AT, 1448606_AT, 1451161_A_AT, 1419483_AT                                                                                                         |
| Annotation Cluster 23 | Enrichment Score: 0.3647640030852192  |                                                                 |    |        |             |                                                                                                                                                                      |
| Category              | Term                                  | Count                                                           | %  | PValue | Genes       |                                                                                                                                                                      |
| signaling             | GOTERM_BP_FAT                         | GO:0042325-regulation of phosphorylation                        | 3  | 4.41   | 0.421529239 | 1420361_AT, 1448606_AT, 1418910_AT                                                                                                                                   |
| signaling             | GOTERM_BP_FAT                         | GO:0019220-regulation of phosphate metabolic process            | 3  | 4.41   | 0.436958451 | 1420361_AT, 1448606_AT, 1418910_AT                                                                                                                                   |
| signaling             | GOTERM_BP_FAT                         | GO:0051174-regulation of phosphorus metabolic process           | 3  | 4.41   | 0.436958451 | 1420361_AT, 1448606_AT, 1418910_AT                                                                                                                                   |
| Annotation Cluster 24 | Enrichment Score: 0.31694277192642684 |                                                                 |    |        |             |                                                                                                                                                                      |
| Category              | Term                                  | Count                                                           | %  | PValue | Genes       |                                                                                                                                                                      |
|                       | GOTERM_CC_FAT                         | GO:0005792-microsome                                            | 3  | 4.41   | 0.302373509 | 1421812_AT, 1418028_AT, 1416612_AT                                                                                                                                   |
|                       | GOTERM_CC_FAT                         | GO:0042598-vesicular fraction                                   | 3  | 4.41   | 0.315465801 | 1421812_AT, 1418028_AT, 1416612_AT                                                                                                                                   |

|           |                       |                                                                                                         |       |       |             |                                                                                                                                |
|-----------|-----------------------|---------------------------------------------------------------------------------------------------------|-------|-------|-------------|--------------------------------------------------------------------------------------------------------------------------------|
|           | GOTERM_CC_FAT         | GO:0005624-membrane fraction                                                                            | 4     | 5.88  | 0.605045042 | 1426509_S_AT, 1426508_AT, 1421812_AT, 1418028_AT, 1416612_AT                                                                   |
|           | GOTERM_CC_FAT         | GO:0005626-insoluble fraction                                                                           | 4     | 5.88  | 0.631242357 | 1426509_S_AT, 1426508_AT, 1421812_AT, 1418028_AT, 1416612_AT                                                                   |
|           | GOTERM_CC_FAT         | GO:0000267-cell fraction                                                                                | 4     | 5.88  | 0.714177684 | 1426509_S_AT, 1426508_AT, 1421812_AT, 1418028_AT, 1416612_AT                                                                   |
|           | Annotation Cluster 25 | Enrichment Score: 0.2723631535154015                                                                    |       |       |             |                                                                                                                                |
|           | Category              | Term                                                                                                    | Count | %     | PValue      | Genes                                                                                                                          |
|           | SP_PIR_KEYWORDS       | iron                                                                                                    | 3     | 4.41  | 0.394711934 | 1454268_A_AT, 1420361_AT, 1416612_AT                                                                                           |
|           | GOTERM_MF_FAT         | GO:0005506-iron ion binding                                                                             | 3     | 4.41  | 0.408739369 | 1454268_A_AT, 1420361_AT, 1416612_AT                                                                                           |
|           | GOTERM_MF_FAT         | GO:0046914-transition metal ion binding                                                                 | 7     | 10.29 | 0.944460528 | 1454268_A_AT, 1416340_A_AT, 1420361_AT, 1418028_AT, 1416612_AT, 1455965_AT, 1460248_AT                                         |
|           | Annotation Cluster 26 | Enrichment Score: 0.15449423971815338                                                                   |       |       |             |                                                                                                                                |
|           | Category              | Term                                                                                                    | Count | %     | PValue      | Genes                                                                                                                          |
|           | GOTERM_BP_FAT         | GO:0051173-positive regulation of nitrogen compound metabolic process                                   | 4     | 5.88  | 0.486259515 | 1452014_A_AT, 1420361_AT, 1418910_AT, 1419132_AT                                                                               |
|           | GOTERM_BP_FAT         | GO:0031328-positive regulation of cellular biosynthetic process                                         | 4     | 5.88  | 0.51470792  | 1452014_A_AT, 1420361_AT, 1418910_AT, 1419132_AT                                                                               |
|           | GOTERM_BP_FAT         | GO:0009891-positive regulation of biosynthetic process                                                  | 4     | 5.88  | 0.520303373 | 1452014_A_AT, 1420361_AT, 1418910_AT, 1419132_AT                                                                               |
|           | GOTERM_BP_FAT         | GO:0045944-positive regulation of transcription from RNA polymerase II promoter                         | 3     | 4.41  | 0.536738344 | 1452014_A_AT, 1420361_AT, 1418910_AT                                                                                           |
|           | GOTERM_BP_FAT         | GO:0045893-positive regulation of transcription, DNA-dependent                                          | 3     | 4.41  | 0.624129064 | 1452014_A_AT, 1420361_AT, 1418910_AT                                                                                           |
|           | GOTERM_BP_FAT         | GO:0051254-positive regulation of RNA metabolic process                                                 | 3     | 4.41  | 0.62852236  | 1452014_A_AT, 1420361_AT, 1418910_AT                                                                                           |
|           | GOTERM_BP_FAT         | GO:0045941-positive regulation of transcription                                                         | 3     | 4.41  | 0.694855856 | 1452014_A_AT, 1420361_AT, 1418910_AT                                                                                           |
|           | GOTERM_BP_FAT         | GO:0010628-positive regulation of gene expression                                                       | 3     | 4.41  | 0.708370506 | 1452014_A_AT, 1420361_AT, 1418910_AT                                                                                           |
|           | GOTERM_BP_FAT         | GO:0045935-positive regulation of nucleobase, nucleoside, nucleotide and nucleic acid metabolic process | 3     | 4.41  | 0.728298171 | 1452014_A_AT, 1420361_AT, 1418910_AT                                                                                           |
|           | GOTERM_BP_FAT         | GO:0010557-positive regulation of macromolecule biosynthetic process                                    | 3     | 4.41  | 0.746017186 | 1452014_A_AT, 1420361_AT, 1418910_AT                                                                                           |
|           | GOTERM_BP_FAT         | GO:0006357-regulation of transcription from RNA polymerase II promoter                                  | 3     | 4.41  | 0.814198901 | 1452014_A_AT, 1420361_AT, 1418910_AT                                                                                           |
|           | GOTERM_BP_FAT         | GO:0010604-positive regulation of macromolecule metabolic process                                       | 3     | 4.41  | 0.826992857 | 1452014_A_AT, 1420361_AT, 1418910_AT                                                                                           |
|           | GOTERM_BP_FAT         | GO:0006355-regulation of transcription, DNA-dependent                                                   | 3     | 4.41  | 0.988133938 | 1452014_A_AT, 1420361_AT, 1418910_AT                                                                                           |
|           | GOTERM_BP_FAT         | GO:0051252-regulation of RNA metabolic process                                                          | 3     | 4.41  | 0.989472578 | 1452014_A_AT, 1420361_AT, 1418910_AT                                                                                           |
|           | GOTERM_BP_FAT         | GO:0045449-regulation of transcription                                                                  | 4     | 5.88  | 0.997419705 | 1452014_A_AT, 1420361_AT, 1418910_AT, 1419132_AT                                                                               |
|           | Annotation Cluster 27 | Enrichment Score: 0.11532949597072797                                                                   |       |       |             |                                                                                                                                |
|           | Category              | Term                                                                                                    | Count | %     | PValue      | Genes                                                                                                                          |
| apoptosis | GOTERM_BP_FAT         | GO:0042981-regulation of apoptosis                                                                      | 3     | 4.41  | 0.762762843 | 1452014_A_AT, 1419004_S_AT, 1418910_AT                                                                                         |
| apoptosis | GOTERM_BP_FAT         | GO:0043067-regulation of programmed cell death                                                          | 3     | 4.41  | 0.767801444 | 1452014_A_AT, 1419004_S_AT, 1418910_AT                                                                                         |
| apoptosis | GOTERM_BP_FAT         | GO:0010941-regulation of cell death                                                                     | 3     | 4.41  | 0.769791407 | 1452014_A_AT, 1419004_S_AT, 1418910_AT                                                                                         |
|           | Annotation Cluster 28 | Enrichment Score: 0.008719633323897162                                                                  |       |       |             |                                                                                                                                |
|           | Category              | Term                                                                                                    | Count | %     | PValue      | Genes                                                                                                                          |
|           | GOTERM_MF_FAT         | GO:0046914-transition metal ion binding                                                                 | 7     | 10.29 | 0.944460528 | 1454268_A_AT, 1416340_A_AT, 1420361_AT, 1418028_AT, 1416612_AT, 1455965_AT, 1460248_AT                                         |
|           | GOTERM_MF_FAT         | GO:0046872-metal ion binding                                                                            | 10    | 14.71 | 0.979505533 | 1454268_A_AT, 1416340_A_AT, 1420361_AT, 1418028_AT, 1421223_A_AT, 1416612_AT, 1455965_AT, 1460248_AT, 1451161_A_AT, 1419128_AT |
|           | GOTERM_MF_FAT         | GO:0043169-cation binding                                                                               | 10    | 14.71 | 0.981612539 | 1454268_A_AT, 1416340_A_AT, 1420361_AT, 1418028_AT, 1421223_A_AT, 1416612_AT, 1455965_AT, 1460248_AT, 1451161_A_AT, 1419128_AT |
|           | GOTERM_MF_FAT         | GO:0043167-ion binding                                                                                  | 10    | 14.71 | 0.984353291 | 1454268_A_AT, 1416340_A_AT, 1420361_AT, 1418028_AT, 1421223_A_AT, 1416612_AT, 1455965_AT, 1460248_AT, 1451161_A_AT, 1419128_AT |
|           | SP_PIR_KEYWORDS       | metal-binding                                                                                           | 6     | 8.82  | 0.987425401 | 1454268_A_AT, 1419298_AT, 1416340_A_AT, 1418028_AT, 1416612_AT, 1455965_AT                                                     |
|           | GOTERM_MF_FAT         | GO:0008270-zinc ion binding                                                                             | 4     | 5.88  | 0.988338271 | 1416340_A_AT, 1418028_AT, 1455965_AT, 1460248_AT                                                                               |

|                               |                          |                                                                   |       |       |             |                                                                                                                                                                                                                                                                            |
|-------------------------------|--------------------------|-------------------------------------------------------------------|-------|-------|-------------|----------------------------------------------------------------------------------------------------------------------------------------------------------------------------------------------------------------------------------------------------------------------------|
|                               | SP_PIR_KEYWORDS          | zinc                                                              | 3     | 4.41  | 0.996026421 | 1416340_A_AT, 1418028_AT, 1455965_AT                                                                                                                                                                                                                                       |
|                               | Annotation Cluster 29    | Enrichment Score: 0.0021074596656234946                           |       |       |             |                                                                                                                                                                                                                                                                            |
|                               | Category                 | Term                                                              | Count | %     | PValue      | Genes                                                                                                                                                                                                                                                                      |
|                               | GOTERM_CC_FAT            | GO:0005856-cytoskeleton                                           | 3     | 4.41  | 0.985804132 | 1426509_S_AT, 1426508_AT, 1451941_A_AT, 1455332_X_AT, 1435477_S_AT, 1438910_A_AT                                                                                                                                                                                           |
|                               | GOTERM_CC_FAT            | GO:0043228-non-membrane-bounded organelle                         | 3     | 4.41  | 0.999869897 | 1426509_S_AT, 1426508_AT, 1451941_A_AT, 1455332_X_AT, 1435477_S_AT, 1438910_A_AT                                                                                                                                                                                           |
|                               | GOTERM_CC_FAT            | GO:0043232-intracellular non-membrane-bounded organelle           | 3     | 4.41  | 0.999869897 | 1426509_S_AT, 1426508_AT, 1451941_A_AT, 1455332_X_AT, 1435477_S_AT, 1438910_A_AT                                                                                                                                                                                           |
|                               | <b>Unclustered terms</b> |                                                                   |       |       |             |                                                                                                                                                                                                                                                                            |
|                               | INTERPRO                 | IPR015631:Signalling lymphocyte activation molecule               | 4     | 5.88  | 2.05E-05    | 1419315_AT, 1422875_AT, 1427301_AT, 1449156_AT                                                                                                                                                                                                                             |
|                               | SP_PIR_KEYWORDS          | receptor                                                          | 17    | 25.00 | 3.86E-05    | 1420394_S_AT, 1422875_AT, 1420699_AT, 1448710_AT, 1421792_S_AT, 1428018_A_AT, 1435477_S_AT, 1451161_A_AT, 1419483_AT, 1419132_AT, 1419599_S_AT, 1419482_AT, 1418826_AT, 1419455_AT, 1451941_A_AT, 1419598_AT, 1455332_X_AT, 1435903_AT, 1448606_AT, 1448891_AT, 1419128_AT |
|                               | UP_SEQ_FEATURE           | sequence variant                                                  | 9     | 13.24 | 4.81E-04    | 1451683_X_AT, 1451784_X_AT, 1422875_AT, 1448591_AT, 1420361_AT, 1437540_AT, 1421792_S_AT, 1435477_S_AT, 1449156_AT, 1425545_X_AT, 1451941_A_AT, 1455332_X_AT, 1418028_AT                                                                                                   |
| immune                        | GOTERM_BP_FAT            | GO:0048002-antigen processing and presentation of peptide antigen | 4     | 5.88  | 6.57E-04    | 1425545_X_AT, 1451683_X_AT, 1451784_X_AT, 1421812_AT, 1451941_A_AT, 1420361_AT, 1455332_X_AT, 1435477_S_AT                                                                                                                                                                 |
|                               | INTERPRO                 | IPR007237:CD20/IgE Fc receptor beta subunit                       | 3     | 4.41  | 0.002025329 | 1419599_S_AT, 1418826_AT, 1419598_AT, 1424754_AT                                                                                                                                                                                                                           |
|                               | GOTERM_MF_FAT            | GO:0005044-scavenger receptor activity                            | 3     | 4.41  | 0.010980001 | 1448380_AT, 1449195_S_AT, 1448891_AT                                                                                                                                                                                                                                       |
|                               | SP_PIR_KEYWORDS          | sulfation                                                         | 3     | 4.41  | 0.013052052 | 1418021_AT, 1419482_AT, 1448710_AT, 1419483_AT                                                                                                                                                                                                                             |
|                               | SP_PIR_KEYWORDS          | glycosidase                                                       | 3     | 4.41  | 0.037284712 | 1416340_A_AT, 1436996_X_AT, 1423547_AT, 1439426_X_AT                                                                                                                                                                                                                       |
| immune                        | GOTERM_MF_FAT            | GO:0032403-protein complex binding                                | 3     | 4.41  | 0.050623651 | 1451941_A_AT, 1455332_X_AT, 1448303_AT, 1426808_AT, 1435477_S_AT                                                                                                                                                                                                           |
|                               | UP_SEQ_FEATURE           | short sequence motif:Cell attachment site                         | 3     | 4.41  | 0.053720887 | 1424067_AT, 1448303_AT, 1451161_A_AT                                                                                                                                                                                                                                       |
| immune                        | UP_SEQ_FEATURE           | domain:Ig-like V-type                                             | 3     | 4.41  | 0.062520649 | 1421792_S_AT, 1428018_A_AT, 1435903_AT                                                                                                                                                                                                                                     |
|                               | SP_PIR_KEYWORDS          | polymorphism                                                      | 4     | 5.88  | 0.075869107 | 1418021_AT, 1451941_A_AT, 1422875_AT, 1455332_X_AT, 1435477_S_AT, 1449156_AT                                                                                                                                                                                               |
| immune                        | KEGG_PATHWAY             | mmu04612:Antigen processing and presentation                      | 3     | 4.41  | 0.077093483 | 1425545_X_AT, 1451683_X_AT, 1451784_X_AT, 1421812_AT, 1448591_AT                                                                                                                                                                                                           |
|                               | GOTERM_BP_FAT            | GO:0001655-urogenital system development                          | 3     | 4.41  | 0.16526476  | 1452014_A_AT, 1421223_A_AT, 1418910_AT                                                                                                                                                                                                                                     |
|                               | KEGG_PATHWAY             | mmu04670:Leukocyte transendothelial migration                     | 3     | 4.41  | 0.175657176 | 1454268_A_AT, 1424067_AT, 1448710_AT                                                                                                                                                                                                                                       |
|                               | KEGG_PATHWAY             | mmu04650:Natural killer cell mediated cytotoxicity                | 3     | 4.41  | 0.175657176 | 1425545_X_AT, 1451683_X_AT, 1451784_X_AT, 1424067_AT, 1427301_AT                                                                                                                                                                                                           |
|                               | SP_PIR_KEYWORDS          | hydrolase                                                         | 9     | 13.24 | 0.295622672 | 1418021_AT, 1419298_AT, 1417870_X_AT, 1416340_A_AT, 1418825_AT, 1417868_A_AT, 1448591_AT, 1455965_AT, 1436996_X_AT, 1423547_AT, 1439426_X_AT                                                                                                                               |
|                               | KEGG_PATHWAY             | mmu04062:Chemokine signaling pathway                              | 3     | 4.41  | 0.323759014 | 1448710_AT, 1449195_S_AT, 1419561_AT                                                                                                                                                                                                                                       |
| signaling                     | GOTERM_BP_FAT            | GO:0044093-positive regulation of molecular function              | 3     | 4.41  | 0.413738129 | 1420361_AT, 1448606_AT, 1419132_AT                                                                                                                                                                                                                                         |
| development                   | GOTERM_BP_FAT            | GO:0030030-cell projection organization                           | 3     | 4.41  | 0.433120767 | 1448710_AT, 1448606_AT, 1418910_AT                                                                                                                                                                                                                                         |
|                               | SP_PIR_KEYWORDS          | lipoprotein                                                       | 4     | 5.88  | 0.502756052 | 1416527_AT, 1427301_AT, 1448606_AT, 1438910_A_AT                                                                                                                                                                                                                           |
| extracellular matrix/adhesion | GOTERM_CC_FAT            | GO:0005578-proteinaceous extracellular matrix                     | 3     | 4.41  | 0.509463423 | 1448380_AT, 1426808_AT, 1455965_AT                                                                                                                                                                                                                                         |
| extracellular matrix/adhesion | GOTERM_CC_FAT            | GO:0031012-extracellular matrix                                   | 3     | 4.41  | 0.527172974 | 1448380_AT, 1426808_AT, 1455965_AT                                                                                                                                                                                                                                         |
| myelination                   | GOTERM_BP_FAT            | GO:0048878-chemical homeostasis                                   | 3     | 4.41  | 0.529882946 | 1452014_A_AT, 1419064_A_AT, 1420361_AT                                                                                                                                                                                                                                     |
| myelination                   | GOTERM_BP_FAT            | GO:0042592-homeostatic process                                    | 4     | 5.88  | 0.530015865 | 1452014_A_AT, 1419064_A_AT, 1420361_AT, 1419004_S_AT                                                                                                                                                                                                                       |
|                               | GOTERM_BP_FAT            | GO:0042127-regulation of cell proliferation                       | 4     | 5.88  | 0.536889914 | 1448148_AT, 1451941_A_AT, 1452014_A_AT, 1455332_X_AT, 1456567_X_AT, 1435477_S_AT, 1418910_AT                                                                                                                                                                               |
| development                   | GOTERM_BP_FAT            | GO:0030182-neuron differentiation                                 | 3     | 4.41  | 0.555247068 | 1448710_AT, 1437540_AT, 1418910_AT                                                                                                                                                                                                                                         |
|                               | SP_PIR_KEYWORDS          | transmembrane protein                                             | 3     | 4.41  | 0.563170642 | 1425545_X_AT, 1451683_X_AT, 1451784_X_AT, 1451941_A_AT, 1455332_X_AT, 1449164_AT, 1435477_S_AT                                                                                                                                                                             |
|                               | SP_PIR_KEYWORDS          | calcium                                                           | 4     | 5.88  | 0.588065553 | 1419298_AT, 1421223_A_AT, 1451161_A_AT, 1419128_AT                                                                                                                                                                                                                         |
| ion transport/channels        | SP_PIR_KEYWORDS          | transport                                                         | 7     | 10.29 | 0.698992751 | 1454268_A_AT, 1426025_S_AT, 1428114_AT, 1420361_AT, 1427221_AT, 1437540_AT, 1448640_AT, 1417963_AT                                                                                                                                                                         |
|                               | SP_PIR_KEYWORDS          | oxidoreductase                                                    | 3     | 4.41  | 0.717341002 | 1454268_A_AT, 1416612_AT, 1418808_AT                                                                                                                                                                                                                                       |
|                               | GOTERM_BP_FAT            | GO:0008219-cell death                                             | 3     | 4.41  | 0.717891715 | 1419004_S_AT, 1436996_X_AT, 1423547_AT, 1439426_X_AT                                                                                                                                                                                                                       |
|                               | GOTERM_BP_FAT            | GO:0016265-death                                                  | 3     | 4.41  | 0.727157692 | 1419004_S_AT, 1436996_X_AT, 1423547_AT, 1439426_X_AT                                                                                                                                                                                                                       |
| myelination                   | GOTERM_BP_FAT            | GO:0050877-neurological system process                            | 3     | 4.41  | 0.736172056 | 1416340_A_AT, 1419064_A_AT, 1437540_AT                                                                                                                                                                                                                                     |
|                               | GOTERM_BP_FAT            | GO:0051114-oxidation reduction                                    | 3     | 4.41  | 0.805791109 | 1454268_A_AT, 1416612_AT, 1418808_AT                                                                                                                                                                                                                                       |
|                               | GOTERM_MF_FAT            | GO:0005509-calcium ion binding                                    | 3     | 4.41  | 0.862082527 | 1421223_A_AT, 1451161_A_AT, 1419128_AT                                                                                                                                                                                                                                     |
|                               | GOTERM_CC_FAT            | GO:0005783-endoplasmic reticulum                                  | 4     | 5.88  | 0.883113724 | 1421812_AT, 1418825_AT, 1416612_AT, 1418808_AT                                                                                                                                                                                                                             |



|           |                 |                                            |    |       |             |                                                                                                                                                                                                                                                                                                                                                            |
|-----------|-----------------|--------------------------------------------|----|-------|-------------|------------------------------------------------------------------------------------------------------------------------------------------------------------------------------------------------------------------------------------------------------------------------------------------------------------------------------------------------------------|
|           | GOTERM_BP_FAT   | GO:0007242-intracellular signaling cascade | 3  | 4.41  | 0.92974142  | 1416527_AT, 1420361_AT, 1448606_AT                                                                                                                                                                                                                                                                                                                         |
|           | GOTERM_CC_FAT   | GO:0031090-organelle membrane              | 3  | 4.41  | 0.959984749 | 1426025_S_AT, 1418825_AT, 1420361_AT                                                                                                                                                                                                                                                                                                                       |
|           | SP_PIR_KEYWORDS | phosphoprotein                             | 22 | 32.35 | 0.96868323  | 1426025_S_AT, 1454268_A_AT, 1451683_X_AT, 1419298_AT, 1420394_S_AT, 1418825_AT, 1422875_AT, 1420361_AT, 1418808_AT, 1438910_A_AT, 1416527_AT, 1422660_AT, 1426808_AT, 1435903_AT, 1427301_AT, 1451784_X_AT, 1448710_AT, 1420699_AT, 1421223_A_AT, 1435477_S_AT, 1417963_AT, 1426509_S_AT, 1425545_X_AT, 1426508_AT, 1451941_A_AT, 1455332_X_AT, 1448303_AT |
| signaling | GOTERM_CC_FAT   | GO:0005739-mitochondrion                   | 4  | 5.88  | 0.985725559 | 1454268_A_AT, 1448148_AT, 1416527_AT, 1456567_X_AT, 1418808_AT                                                                                                                                                                                                                                                                                             |
|           | GOTERM_MF_FAT   | GO:0000166-nucleotide binding              | 3  | 4.41  | 0.999512242 | 1418825_AT, 1416527_AT, 1422660_AT                                                                                                                                                                                                                                                                                                                         |
|           | SP_PIR_KEYWORDS | acetylation                                | 3  | 4.41  | 0.999940469 | 1416527_AT, 1421223_A_AT, 1426808_AT                                                                                                                                                                                                                                                                                                                       |
|           | SP_PIR_KEYWORDS | cytoplasm                                  | 4  | 5.88  | 0.999949456 | 1426509_S_AT, 1426508_AT, 1451941_A_AT, 1455332_X_AT, 1419004_S_AT, 1422660_AT, 1435477_S_AT                                                                                                                                                                                                                                                               |
