# Supplementary material
Source: PubMed Central journal article supplement (PMC4832927)
Supplement: NIHMS776226-supplement-7.pdf [file NIHMS776226-supplement-7.pdf]

### Proteome vs transcriptome direction at equivalent cutoff

|                                |       |              |              |              |              |              |       |       |              |       |      |
|--------------------------------|-------|--------------|--------------|--------------|--------------|--------------|-------|-------|--------------|-------|------|
| Proteome cutoff p <            | 1     | 0.9          | 0.8          | 0.7          | 0.6          | 0.5          | 0.4   | 0.3   | 0.2          | 0.1   | 0.05 |
| Transcriptome cutoff q <       | 1     | 0.9          | 0.8          | 0.7          | 0.6          | 0.5          | 0.4   | 0.3   | 0.2          | 0.1   | 0.05 |
| Same - Probeset vs Protein     | 1831  | 834          | 362          | 180          | 115          | 75           | 34    | 14    | 9            | 2     | 0    |
| Opposite - Probeset vs Protein | 1916  | 634          | 316          | 141          | 77           | 49           | 22    | 6     | 1            | 0     | 0    |
| % in same direction            | 49    | 57           | 53           | 56           | 60           | 60           | 61    | 70    | 90           | 100   |      |
| Chi sq.p-value                 | 0.165 | <b>0.000</b> | <b>0.077</b> | <b>0.029</b> | <b>0.006</b> | <b>0.020</b> | 0.109 | 0.074 | <b>0.011</b> | 0.157 |      |
| Same - Gene vs Protein         | 1099  | 538          | 274          | 139          | 85           | 55           | 27    | 11    | 5            | 2     | 0    |
| Opposite - Gene vs Protein     | 1220  | 441          | 239          | 119          | 65           | 44           | 18    | 6     | 1            | 0     | 0    |
| % in same direction            | 47    | 55.0         | 53.4         | 53.9         | 56.7         | 55.6         | 60.0  | 64.7  | 83.3         | 100.0 |      |
| Chi sq.p-value                 | 0.012 | <b>0.002</b> | 0.122        | 0.213        | 0.102        | 0.269        | 0.180 | 0.225 | 0.102        | 0.157 |      |

### Significant proteome vs filtered transcriptome direction

|                                |       |              |              |              |              |       |       |              |       |       |      |
|--------------------------------|-------|--------------|--------------|--------------|--------------|-------|-------|--------------|-------|-------|------|
| Proteome cutoff p <            | 0.05  | 0.05         | 0.05         | 0.05         | 0.05         | 0.05  | 0.05  | 0.05         | 0.05  | 0.05  | 0.05 |
| Transcriptome cutoff q <       | 1     | 0.9          | 0.8          | 0.7          | 0.6          | 0.5   | 0.4   | 0.3          | 0.2   | 0.1   | 0.05 |
| Same - Probeset vs Protein     | 205   | 113          | 64           | 34           | 24           | 17    | 6     | 4            | 3     | 2     | 0    |
| Opposite - Probeset vs Protein | 182   | 56           | 27           | 16           | 10           | 8     | 3     | 0            | 0     | 0     | 0    |
| % in same direction            | 53    | 66.9         | 70.3         | 68.0         | 70.6         | 68.0  | 66.7  | 100.0        | 100.0 | 100.0 |      |
| Chi sq.p-value                 | 0.242 | <b>0.000</b> | <b>0.000</b> | <b>0.011</b> | <b>0.016</b> | 0.072 | 0.317 | <b>0.046</b> | 0.083 | 0.157 |      |
| Same - Gene vs Protein         | 124   | 77           | 49           | 49           | 16           | 13    | 5     | 3            | 2     | 2     | 0    |
| Opposite - Gene vs Protein     | 124   | 37           | 22           | 14           | 9            | 8     | 3     | 0            | 0     | 0     | 0    |
| % in same direction            | 50    | 68           | 69           | 78           | 64           | 62    | 63    | 100          | 100   | 100   |      |
| Chi sq.p-value                 | 1.000 | <b>0.000</b> | <b>0.001</b> | <b>0.000</b> | 0.162        | 0.275 | 0.480 | 0.083        | 0.157 | 0.157 |      |

### Significant transcriptome vs filtered proteome direction

|                                |       |              |              |              |              |              |              |       |       |         |      |
|--------------------------------|-------|--------------|--------------|--------------|--------------|--------------|--------------|-------|-------|---------|------|
| Proteome cutoff p <            | 1     | 0.9          | 0.8          | 0.7          | 0.6          | 0.5          | 0.4          | 0.3   | 0.2   | 0.1     | 0.05 |
| Transcriptome cutoff q <       | 0.05  | 0.05         | 0.05         | 0.05         | 0.05         | 0.05         | 0.05         | 0.05  | 0.05  | 0.05    | 0.05 |
| Same - Probeset vs Protein     | 6     | 6            | 6            | 6            | 6            | 6            | 5            | 3     | 2     | 0       |      |
| Opposite - Probeset vs Protein | 1     | 0            | 0            | 0            | 0            | 0            | 0            | 0     | 0     | 0       |      |
| % in same direction            | 90    | 100          | 100          | 100          | 100          | 100          | 100          | 100   | 100   |         |      |
| Chi sq.p-value                 | 0.059 | <b>0.014</b> | <b>0.014</b> | <b>0.014</b> | <b>0.014</b> | <b>0.014</b> | <b>0.025</b> | 0.083 | 0.157 | #DIV/0! |      |
| Same - Gene vs Protein         | 3     | 3            | 3            | 3            | 3            | 3            | 3            | 2     | 1     | 0       | 0    |
| Opposite - Gene vs Protein     | 1     | 0            | 0            | 0            | 0            | 0            | 0            | 0     | 0     | 0       | 0    |
| % in same direction            | 75    | 100          | 100          | 100          | 100          | 100          | 100          | 100   | 100   |         |      |
| Chi sq.p-value                 | 0.317 | 0.083        | 0.083        | 0.083        | 0.083        | 0.083        | 0.083        | 0.157 | 0.317 |         |      |
